# Supplementary material for: Isolation and In Silico SARS-CoV-2 Main Protease Inhibition Potential of Jusan Coumarin, a New Dicoumarin from Artemisia glauca
Source: MDPI journal article supplement (doi:10.3390/molecules27072281), 2022-03-31
Supplement: s1 [file s1]

## Supporting Data

### Isolation and *in silico* SARS-CoV-2 main protease inhibition potential of jusan coumarin, a new dicoumarin from *Artemisia glauca*

Suleimen Yerlan M.<sup>1,2</sup>, Jose Rani A.<sup>3</sup>, Suleimen Raigul N.<sup>4\*</sup>, Ishmuratova Margarita Yu.<sup>5</sup>, Toppet Suzanne<sup>3</sup>, Dehaen Wim<sup>3</sup>, Aisha A. Alsfook<sup>6</sup>, Eslam B. Elkaeed<sup>7</sup>, Ibrahim. H. Eissa<sup>8</sup>, Ahmed M. Metwaly<sup>9,10\*</sup>

<sup>1</sup>The International Centre for Interdisciplinary Solutions on Antibiotics and Secondary Metabolites, Republican collection of microorganisms, Nur-Sultan, Republic of Kazakhstan

<sup>2</sup> The laboratory of Engineering Profile of NMR Spectroscopy, Sh. Ualikhanov Kokshetau University, Kokshetau, Republic of Kazakhstan

<sup>3</sup>Catholic University of Leuven, Leuven, Belgium

<sup>4</sup> L.N. Gumilyov Eurasian National University, 010010, Nur-Sultan, Kazakstan

<sup>5</sup> Department of Botany, E.A. Buketov Karaganda University, Karaganda, Republic of Kazakhstan

<sup>6</sup>Department of Pharmaceutical Sciences, College of Pharmacy, Princess Nourah bint Abdulrahman University, P.O. Box 84428, Riyadh 11671, Saudi Arabia

<sup>7</sup>Department of Pharmaceutical Sciences, College of Pharmacy, AlMaarefa University, Ad Diriyah 13713, Riyadh, Saudi Arabia

<sup>8</sup>Pharmaceutical Medicinal Chemistry & Drug Design Department, Faculty of Pharmacy (Boys), Al-Azhar University, Cairo11884, Egypt

<sup>9</sup>Pharmacognosy and Medicinal Plants Department, Faculty of Pharmacy (Boys), Al-Azhar University, Cairo, Egypt

<sup>10</sup>Biopharmaceutical Product Research Department, Genetic Engineering and Biotechnology Research Institute, City of Scientific Research and Technological Applications, Alexandria, Egypt

## Content

|                 |                      |
|-----------------|----------------------|
| Method          | Fingerprint studies  |
|                 | Molecular Similarity |
|                 | Docking studies      |
|                 | ADMET studies        |
|                 | Toxicity studies     |
|                 | Molecular dynamics   |
| Spectral data   |                      |
| Toxicity report |                      |

# Method

## 1. General experimental section

NMR spectra were carried out on a commercial instrument (Bruker Avance 300 and 600 MHz), chemical shifts ( $\delta$ ) are presented in parts per million (ppm) and re-calculated with respect to tetramethylsilane (TMS) ( $^1\text{H}$ ) or carbon signals of deuterium solvents ( $^{13}\text{C}$ ). Spin-spin coupling constants (J) are given in hertz (Hz). Refinement of  $^{13}\text{C}$  NMR spectra signals was carried out using Dept, HSQC, HMBC NMR spectra. Mass spectra were recorded on an HP5989A instrument (CI and EI, ionization energy 70 eV) with Apollo 300 data, and on a Kratos MS50TC instrument for accurate calculations (reaching by electric shock (ESI), common solvent mixture:  $\text{CH}_2\text{Cl}_2$ -MeOH +  $\text{NH}_4\text{OAc}$ ) with MASSLYNX system data. UV spectra were obtained on a Perkin-Elmer Lambda 20 Spectrometr instrument. Melting points were determined on Reichert Thermovar. For column chromatography, silica gel 0.06-0.2 mm (Acros) was used as the stationary phase. Silica gel 32-63 mesh was used for flash column chromatography.

## 2. Plant material

To study the component composition of *Artemisia glauca* Pall. ex Willd., or wormwood gray (family *Asteraceae*), the aboveground part is collected in the East Kazakhstan region (Altai Mountains).

Species affiliation is identified by employees of the Altai Botanical Garden (Reader city, eastern Kazakhstan). The herbarium sample is stored in the International Scientific Research Holding «Phytochemistry» Fund. The herbarium sample code is 2007.09.06.03.12.

## 3. Extraction and isolation

1.04 kg of raw material was placed in a round-bottomed flask and filled with chloroform and heated to the boiling point of solvents. This operation was repeated three times. The solvent was evaporated on a rotary evaporator under the vacuum of a water-jet pump to obtain an extract weighing 20 g, which was used for preparative chromatographic separation by column chromatography on silica gel.

## 4. Molecular Similarity

Molecular Similarity of the tested compound against the eight co-crystallized ligands of SARS-Cov-2 was carried out calculated using Discovery studio 4.0. At first, the CHARMM force field was applied then the compound was prepared using prepare ligand protocol. Then, the tested compound was used as a reference compound while the co-crystallized ligands were used as a test set. The protocol was adjusted to give one output. The default molecular properties were applied.

The molecular properties include the number of rotatable bonds, number of rings, number of aromatic rings, number of hydrogen bond donors (HBA), number of hydrogen bond acceptors (HBD), partition coefficient (ALog p), molecular weight (M. Wt), and molecular fractional polar surface area (MFPSA).

## **5. Fingerprint study**

A fingerprint study of the tested compound against the eight co-crystallized ligands of SARS-Cov-2 was carried out calculated using Discovery studio 4.0. At first, the CHARMM force field was applied then the compounds were prepared using prepare ligand protocol. Then, the tested compound was used as a reference compound while the co-crystallized ligands was used as a test set. The protocol was adjusted to give the most related co-crystallized ligand to the compound. The default molecular properties were applied. The used fingerprints were based on some parameters related to the type of atoms which may be one of the following: charge, hybridization, H-bond acceptor, H-bond donor, Positive ionizable, Negative ionizable, Halogen, Aromatic, or None of the above. In addition, it includes the ALogP category of atoms.

## **6. DFT**

The DFT parameters (total energy, binding energy, HOMO, LUMO, gap energy, dipole moment, and electrostatic potential) were calculated using Discovery studio software. the tested compounds were prepared using prepare ligand protocol. Then, the prepared compounds were subjected to DFT calculation protocol using the default option

## **7. Docking studies**

Crystal structure of SARS-Cov-2 main protease (PDB ID: 6W63) was obtained from Protein Data Bank. The co-crystallized ligand **X77**, (N-(4-tert-butylphenyl)-N-[(1R)-2-(cyclohexylamino)-2-oxo-1-(pyridin-3-yl)ethyl]-1H-imidazole-4-carboxamide), was used as a reference ligand. The docking investigation was accomplished using MOE2014 software. At first, the crystal structure of SARS-Cov-2 main protease was prepared by removing water molecules. Only one chain was retained besides the co-crystallized ligand (GWS). Then, the selected chain was protonated and subjected to minimization of the energy process. Next, the active site of the target protein was defined. Structures of the tested compounds and the co-crystallized ligand were drawn using ChemBioDraw Ultra 14.0 and saved as MDL-SD format. Such file was opened using MOE to display the 3D structures which were protonated and subjected to energy minimization.

Formerly, validation of the docking process was performed by docking the co-crystallized ligand against the isolated pocket of the active site. The produced RMSD value indicated the validity of the process. Finally, docking of the tested compounds was done through the dock option inserted in compute window. For each docked molecule, 30 docked poses were produced using ASE for scoring function and force field for refinement. The results of the docking process were then visualized using Discovery Studio 4.0 software.

## **8. ADMET**

ADMET descriptors (absorption, distribution, metabolism, excretion and toxicity) of the compounds were determined using Discovery studio 4.0. At first, the CHARMM force field was applied then the tested compounds were prepared and minimized according to the preparation of small molecule protocol. Then ADMET descriptors protocol was applied to carry out these studies.

## **9. Toxicity studies**

The toxicity parameters of the tested compounds were calculated using Discovery studio 4.0. Indinavir was used as a reference drug. At first, the CHARMM force field was applied then the compounds were prepared and minimized according to the preparation of small molecule protocol. Then different parameters were calculated from the toxicity prediction (extensible) protocol.

## **10. Molecular dynamics simulations**

The system was prepared using the web-based CHARMM-GUI[1-3] interface with the CHARMM36 force field[4]. All the simulations were done using the NAMD 2.13[5] package. The TIP3P explicit solvation model was used[6], and the periodic boundary conditions were set with a dimension of the dimensions 82.65 Å, 82.36 Å, and 82.64 Å in x, y, and z respectively. The parameters for the top docking results were generated using the CHARMM general force field[7]. Afterward, the system was neutralized using 0.15 mol/L ( $\text{Cl}^-/\text{Na}^+$ ) ions. The MD protocols involved minimization, equilibration, and production. a 2 fs time step of integration was chosen for all MD simulations, the equilibration was carried in the canonical (*NVT*) ensemble, while the isothermal–isobaric (*NPT*) ensemble was for the production. Through the 100 ns of MD production, the pressure was set at 1 atm using the Nose–Hoover Langevin piston barostat[8,9] with a Langevin piston decay of 0.05 ps and a period of 0.1 ps. The temperature was set at 298.15 K using the Langevin thermostat[10]. A distance cutoff of 12.0 Å was applied to short-range nonbonded interactions with a pair list distance of 16 Å, and Lennard Jones interactions were

smoothly truncated at 8.0 Å. Long-range electrostatic interactions were treated using the particle-mesh Ewald (PME) method[11,12], where a grid spacing of 1.0 Å was used for all simulation cells. All covalent bonds involving hydrogen atoms were constrained using the SHAKE algorithm[13]. For consistency, we have applied the same protocol for all MD simulations.

### *Binding Energy Calculations*

The one-average molecular mechanics generalized Born surface area (MM/GBSA)[14,15] approach implemented in the MOLAICAL code[16] was used for the relative binding energy calculations, in which the ligand (*L*) binds to the protein receptor (*R*) to form the complex (*RL*),

$$\Delta G_{bind} = \Delta G_{RL} - \Delta G_R - \Delta G_L$$

which can be represented by contributions of different interactions,

$$\Delta G_{bind} = \Delta H - T\Delta S = \Delta E_{MM} + \Delta G_{Sol} - T\Delta S$$

where the changes in the gas phase molecular mechanics ( $\Delta E_{MM}$ ), solvation Gibbs energy ( $\Delta G_{Sol}$ ), and conformational entropy ( $-T\Delta S$ ) are determined as follows:  $\Delta E_{MM}$  is the sum of the changes in the electrostatic energies  $\Delta E_{ele}$ , the van der Waals energies  $\Delta E_{vdW}$ , and the internal energies  $\Delta E_{int}$  (bonded interactions);  $\Delta G_{Sol}$  is the total of both the polar solvation (calculated using the generalized Born model) and the nonpolar solvation (calculated using the solvent-accessible surface area) and  $-T\Delta S$  is calculated by the normal mode analysis. The solvent dielectric constant of 78.5 and the surface tension constant of 0.03012 kJ mol<sup>-1</sup> Å<sup>2</sup> were used for MM/GBSA calculations.

1. Jo, S.; Kim, T.; Iyer, V.G.; Im, W. CHARMM-GUI: A web-based graphical user interface for CHARMM. *Journal of computational chemistry* **2008**, *29*, 1859-1865, doi:https://doi.org/10.1002/jcc.20945.
2. Brooks, B.R.; Brooks III, C.L.; Mackerell Jr., A.D.; Nilsson, L.; Petrella, R.J.; Roux, B.; Won, Y.; Archontis, G.; Bartels, C.; Boresch, S., et al. CHARMM: The biomolecular simulation program. *Journal of computational chemistry* **2009**, *30*, 1545-1614, doi:https://doi.org/10.1002/jcc.21287.
3. Lee, J.; Cheng, X.; Swails, J.M.; Yeom, M.S.; Eastman, P.K.; Lemkul, J.A.; Wei, S.; Buckner, J.; Jeong, J.C.; Qi, Y., et al. CHARMM-GUI Input Generator for NAMD, GROMACS, AMBER, OpenMM, and CHARMM/OpenMM Simulations Using the CHARMM36 Additive Force Field. *Journal of chemical theory and computation* **2016**, *12*, 405-413, doi:10.1021/acs.jctc.5b00935.
4. Best, R.B.; Zhu, X.; Shim, J.; Lopes, P.E.; Mittal, J.; Feig, M.; Mackerell, A.D., Jr. Optimization of the additive CHARMM all-atom protein force field targeting improved sampling of the backbone phi, psi and side-chain chi(1) and chi(2) dihedral angles. *Journal of chemical theory and computation* **2012**, *8*, 3257-3273, doi:10.1021/ct300400x.

5. Phillips, J.C.; Braun, R.; Wang, W.; Gumbart, J.; Tajkhorshid, E.; Villa, E.; Chipot, C.; Skeel, R.D.; Kale, L.; Schulten, K. Scalable molecular dynamics with NAMD. *Journal of computational chemistry* **2005**, *26*, 1781-1802, doi:10.1002/jcc.20289.
6. Jorgensen, W.L.; Chandrasekhar, J.; Madura, J.D.; Impey, R.W.; Klein, M.L. Comparison of simple potential functions for simulating liquid water. *The Journal of Chemical Physics* **1983**, *79*, 926-935, doi:10.1063/1.445869.
7. Yu, W.; He, X.; Vanommeslaeghe, K.; MacKerell, A.D., Jr. Extension of the CHARMM General Force Field to sulfonyl-containing compounds and its utility in biomolecular simulations. *Journal of computational chemistry* **2012**, *33*, 2451-2468, doi:10.1002/jcc.23067.
8. Nosé, S.; Klein, M.L. Constant pressure molecular dynamics for molecular systems. *Molecular Physics* **1983**, *50*, 1055-1076, doi:10.1080/00268978300102851.
9. Nosé, S. A molecular dynamics method for simulations in the canonical ensemble. *Molecular Physics* **1984**, *52*, 255-268, doi:10.1080/00268978400101201.
10. Grest, G.S.; Kremer, K. Molecular dynamics simulation for polymers in the presence of a heat bath. *Physical review. A, General physics* **1986**, *33*, 3628-3631, doi:10.1103/physreva.33.3628.
11. Darden, T.; York, D.; Pedersen, L. Particle mesh Ewald: AnN·log(N) method for Ewald sums in large systems. *The Journal of Chemical Physics* **1993**, *98*, 10089-10092, doi:10.1063/1.464397.
12. Essmann, U.; Perera, L.; Berkowitz, M.L.; Darden, T.; Lee, H.; Pedersen, L.G. A smooth particle mesh Ewald method. *The Journal of Chemical Physics* **1995**, *103*, 8577-8593, doi:10.1063/1.470117.
13. Ryckaert, J.-P.; Ciccotti, G.; Berendsen, H.J.C. Numerical integration of the cartesian equations of motion of a system with constraints: molecular dynamics of n-alkanes. *Journal of Computational Physics* **1977**, *23*, 327-341, doi:https://doi.org/10.1016/0021-9991(77)90098-5.
14. Genheden, S.; Ryde, U. Comparison of end-point continuum-solvation methods for the calculation of protein-ligand binding free energies. *Proteins* **2012**, *80*, 1326-1342, doi:10.1002/prot.24029.
15. Wang, E.; Sun, H.; Wang, J.; Wang, Z.; Liu, H.; Zhang, J.Z.H.; Hou, T. End-Point Binding Free Energy Calculation with MM/PBSA and MM/GBSA: Strategies and Applications in Drug Design. *Chemical reviews* **2019**, *119*, 9478-9508, doi:10.1021/acs.chemrev.9b00055.
16. Bai, Q.; Tan, S.; Xu, T.; Liu, H.; Huang, J.; Yao, X. MolAICal: a soft tool for 3D drug design of protein targets by artificial intelligence and classical algorithm. *Briefings in bioinformatics* **2021**, *22*, bbaa161.

Table S.1 -  $^1\text{H}$  and  $^{13}\text{C}$  spectral data **2** ( $\text{CDCl}_3$ ,  $\delta$ )

| Position | $\delta\text{H}$ (J=Hz) | $\delta\text{ C}$ | Position | $\delta\text{H}$ (J=Hz) | $\delta\text{ C}$ |
|----------|-------------------------|-------------------|----------|-------------------------|-------------------|
| 2        | -                       | 180               | 9        | -                       | 162.21            |
| 3        | 7.63 d (9.52)           | 143.72            | 10       | -                       | 155.93            |
| 4        | 6.24 (9.91)             | 112.53            | 11       | 4.58 (6.79)             | 65.49             |
| 5        | 7.36 d (8.61)           | 139.43            | 12       | 5.48 t (6.6, 2.2)       | 118.71            |
| 6        | 6.85 dd (8.72, 2.3)     | 112.98            | 13       | -                       | 139.42            |
| 7        | -                       | 161.42            | 14       | 1.82 s                  | 25.89             |
| 8        | 6.82 d (2.3)            | 101.99            | 15       | 1.77 s                  | 18.46             |



# Spectral data

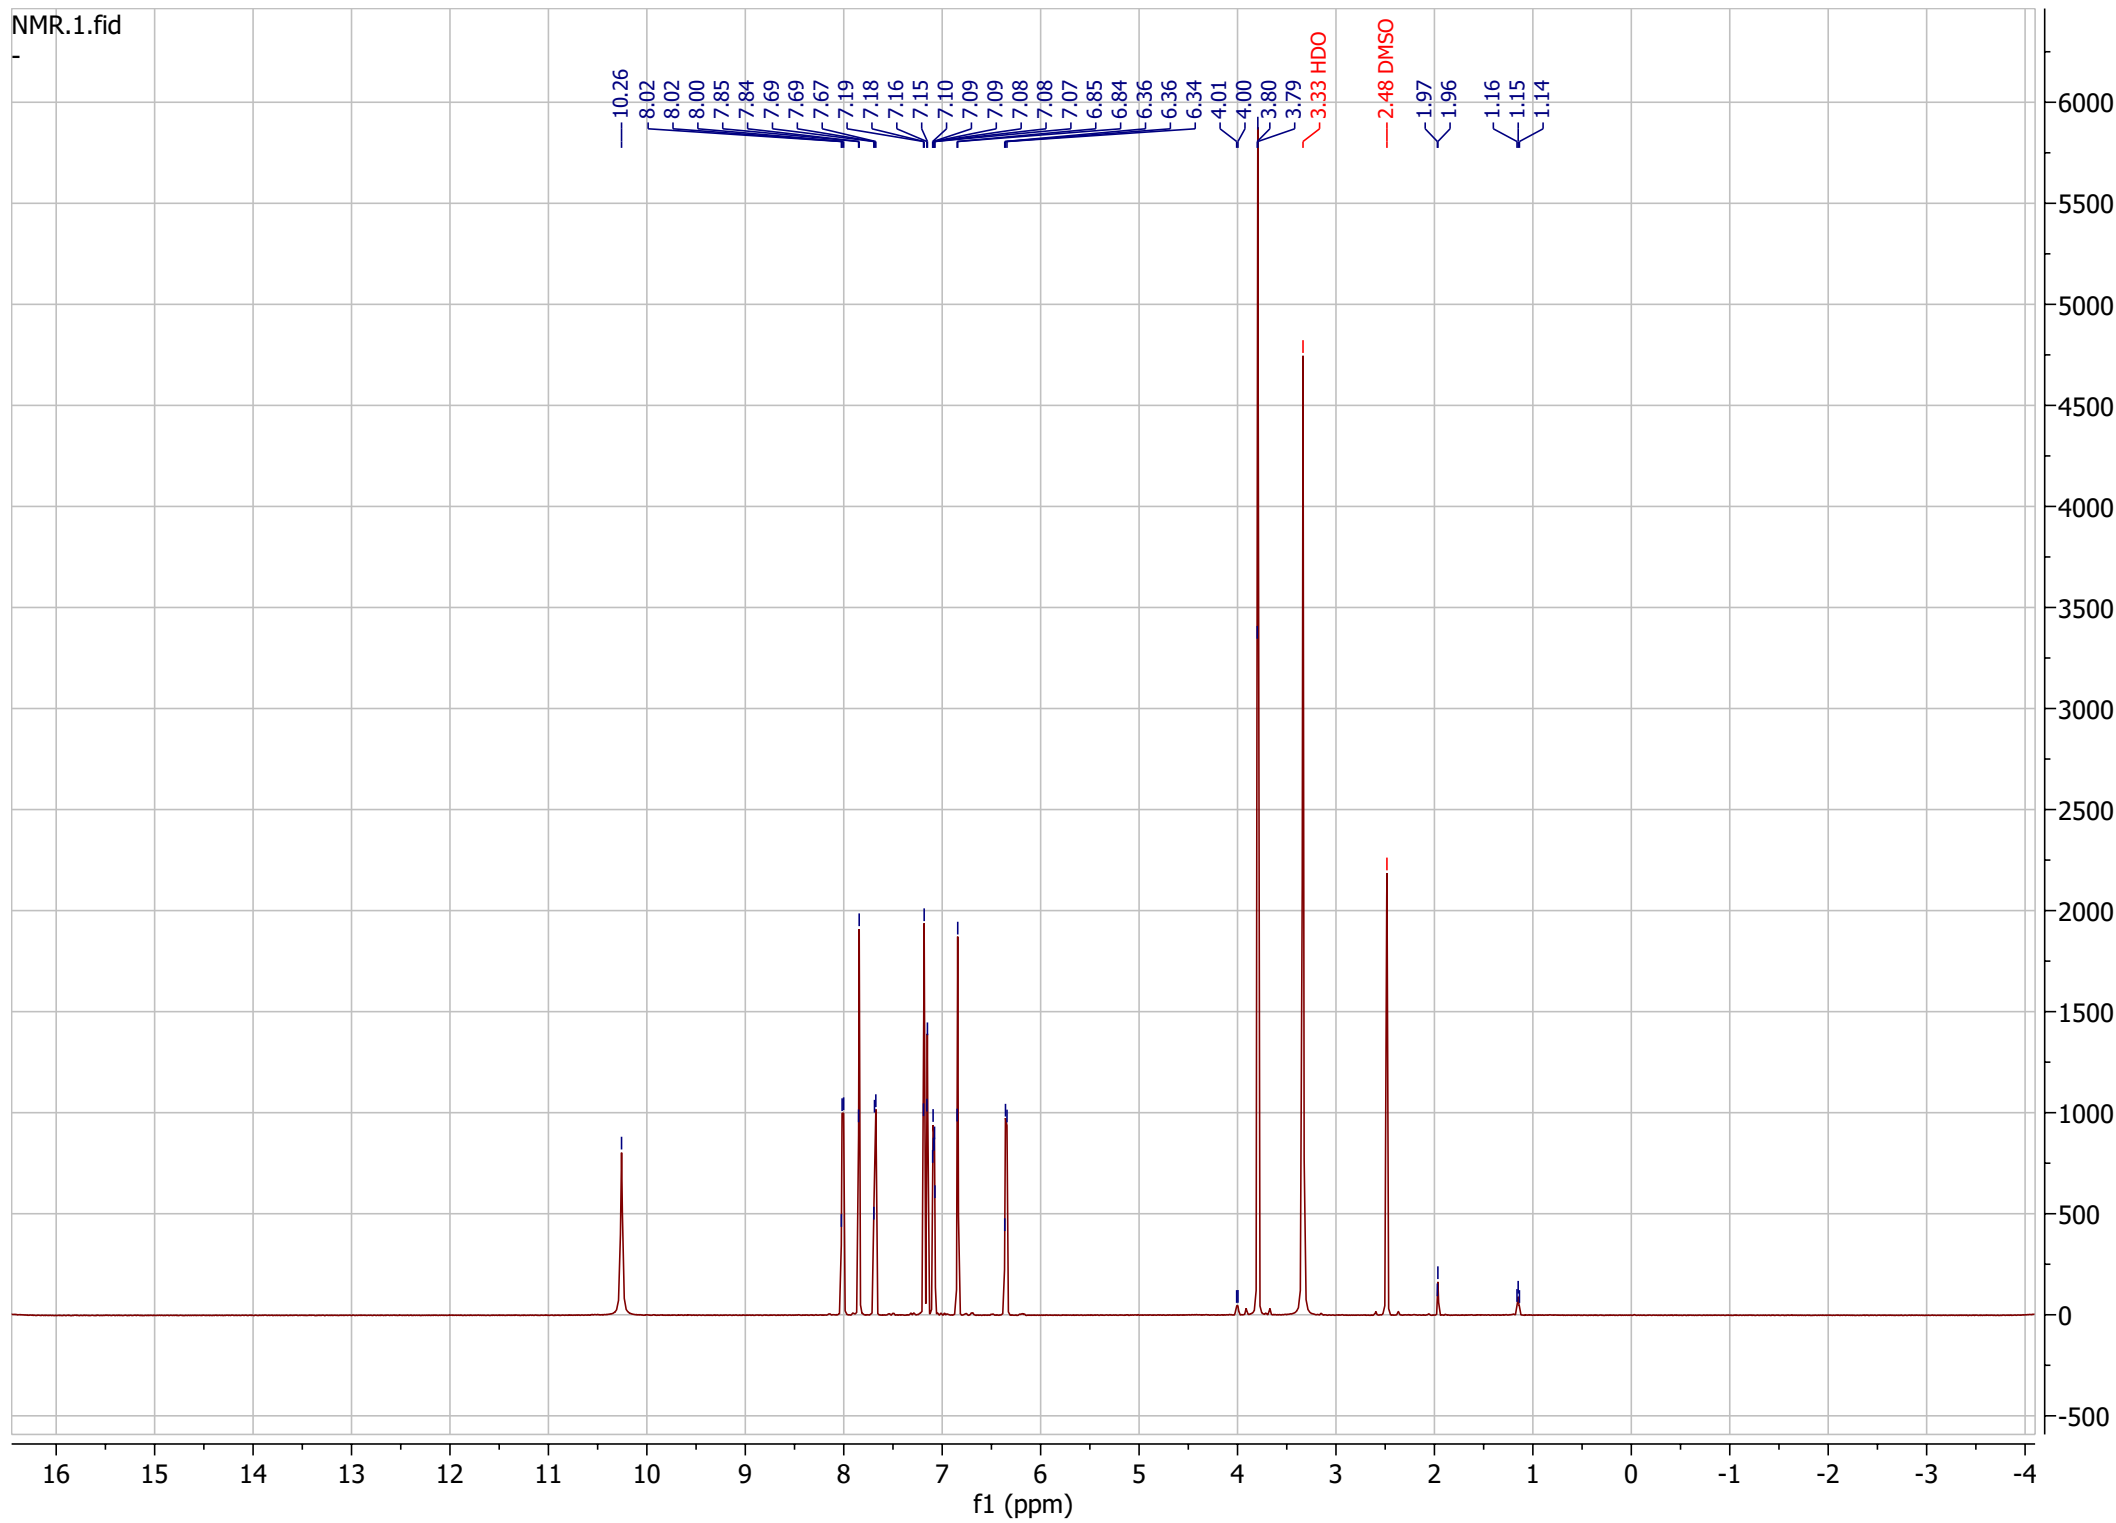

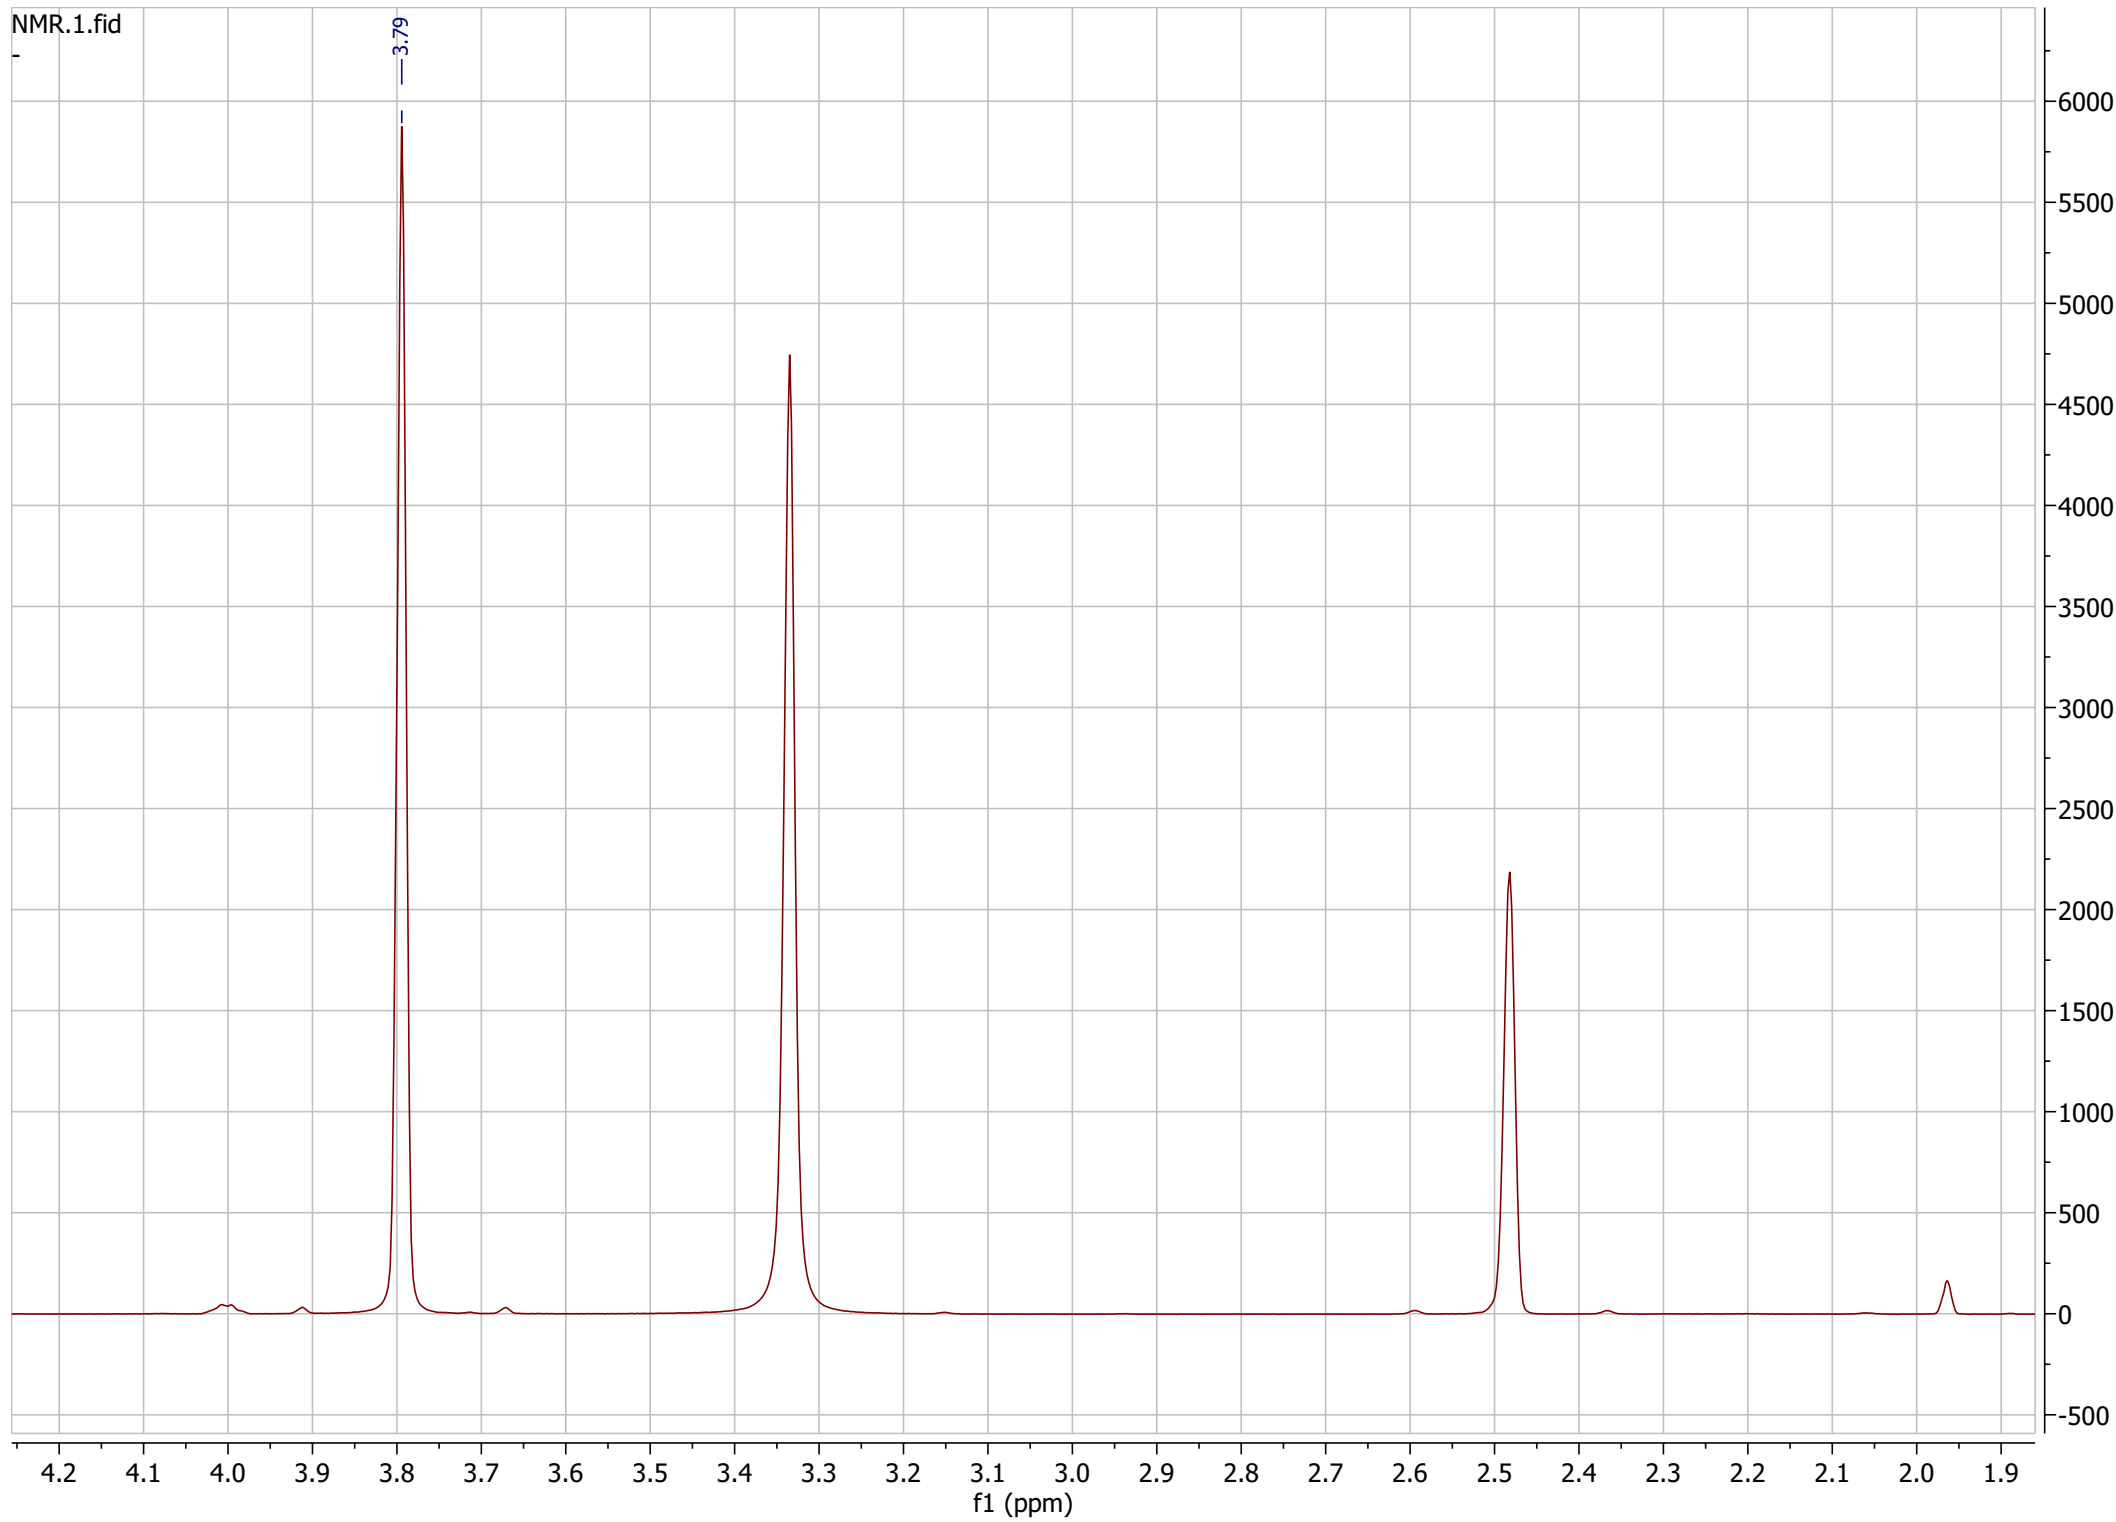

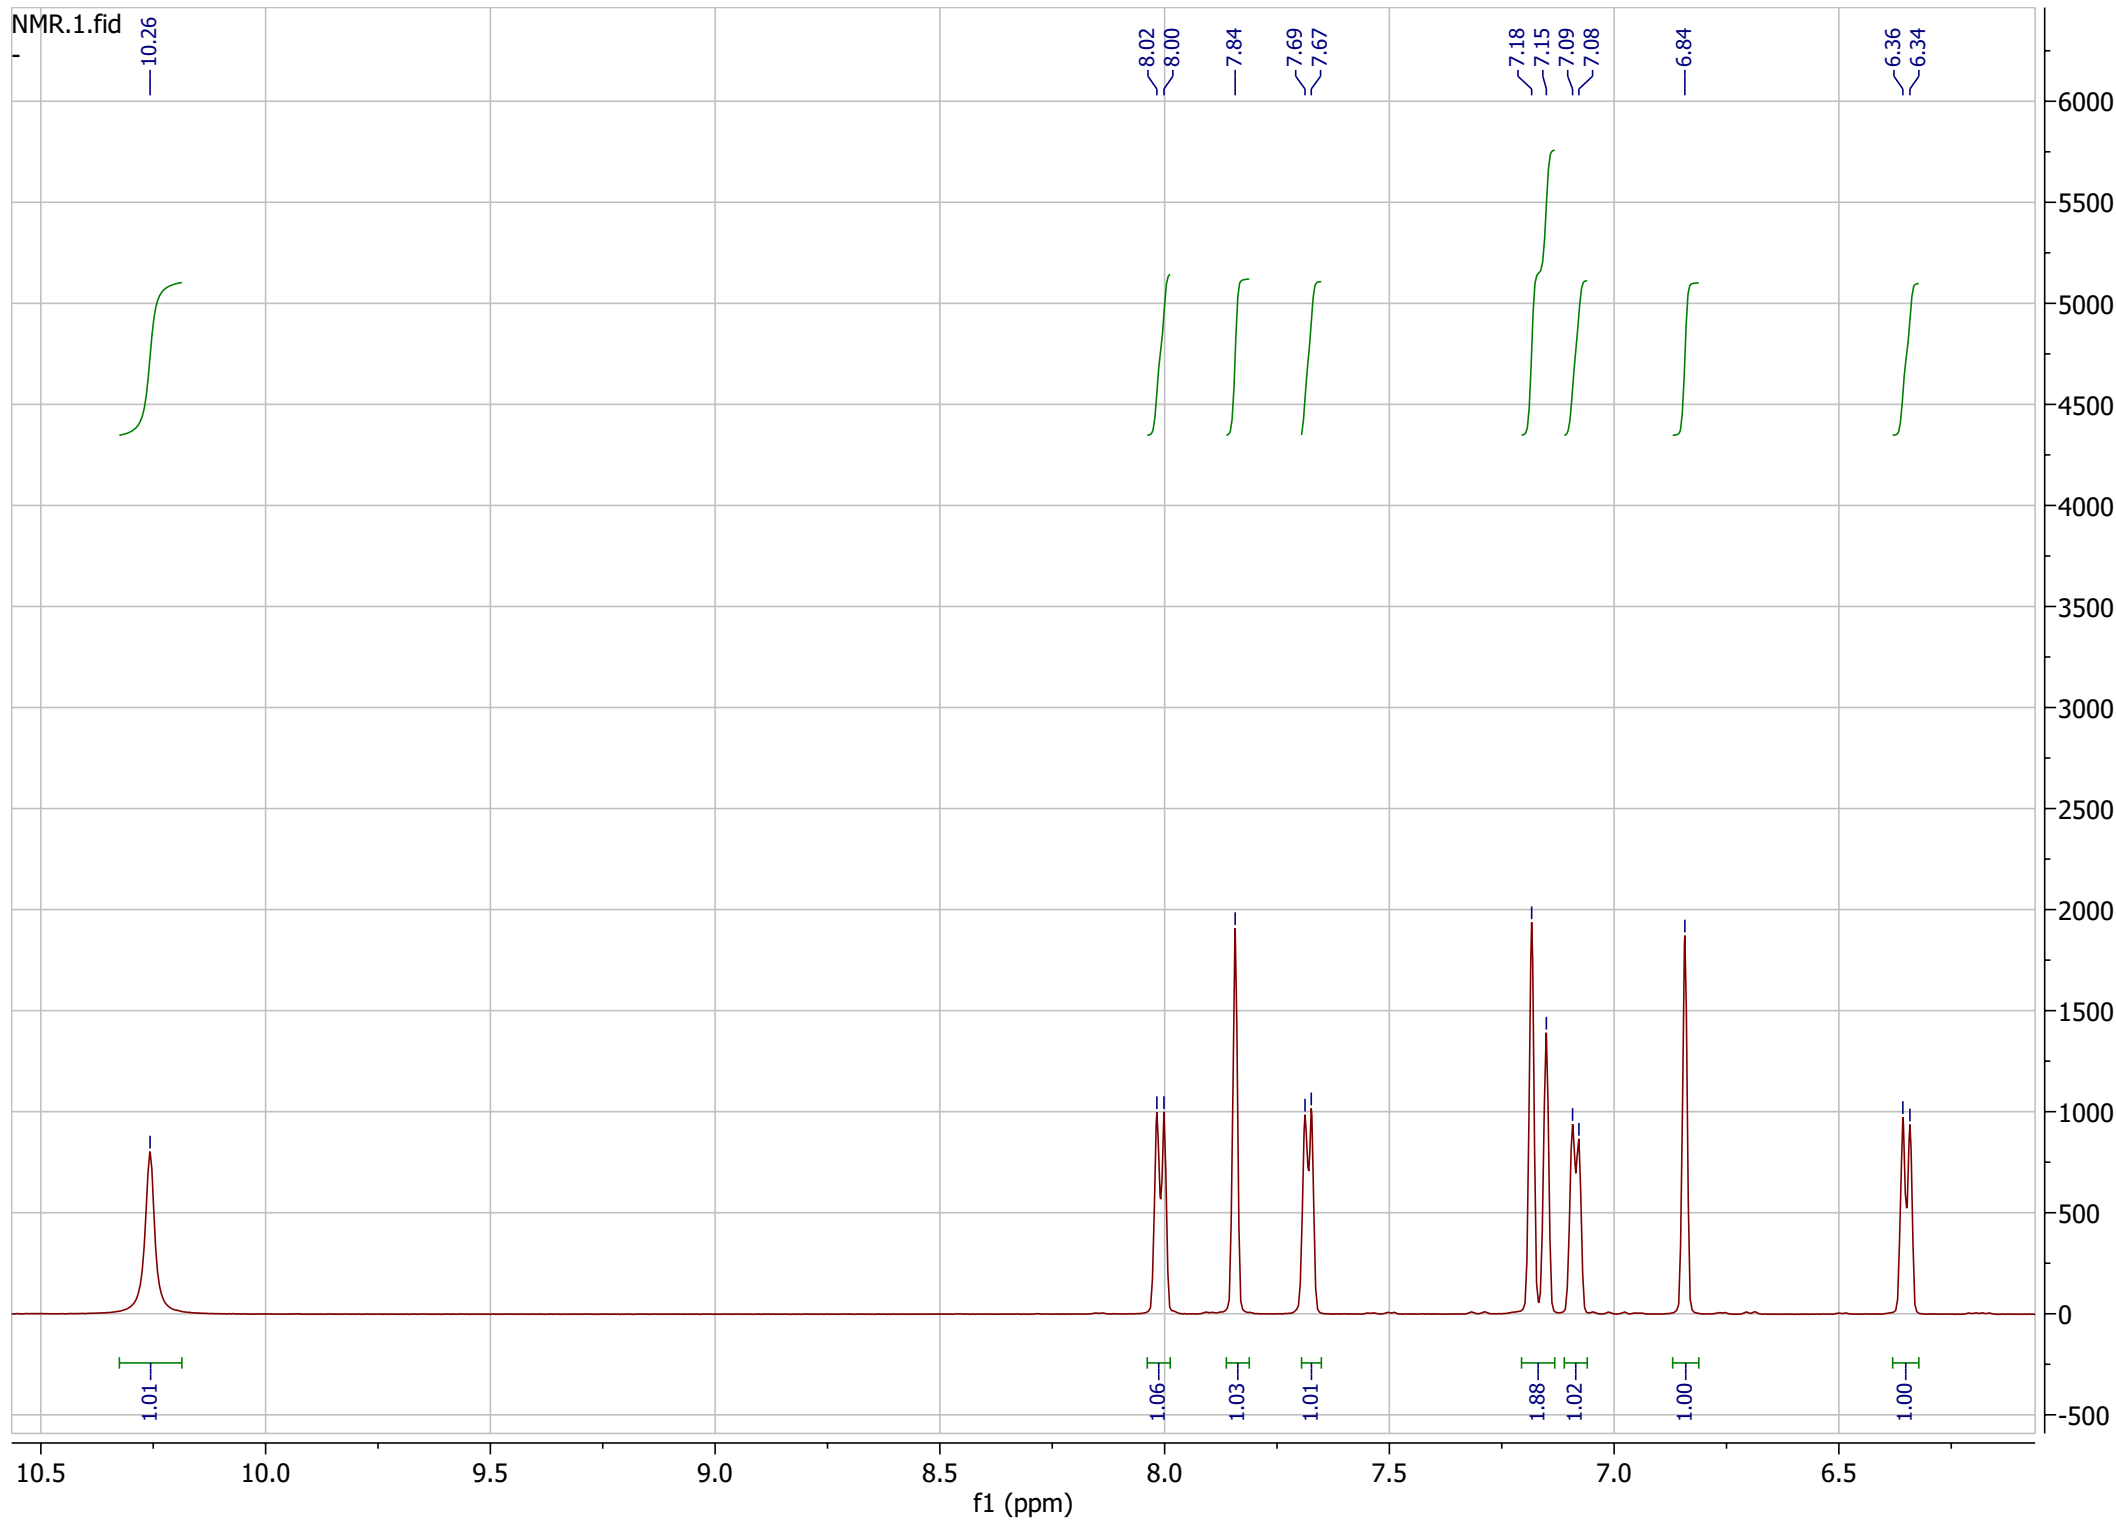

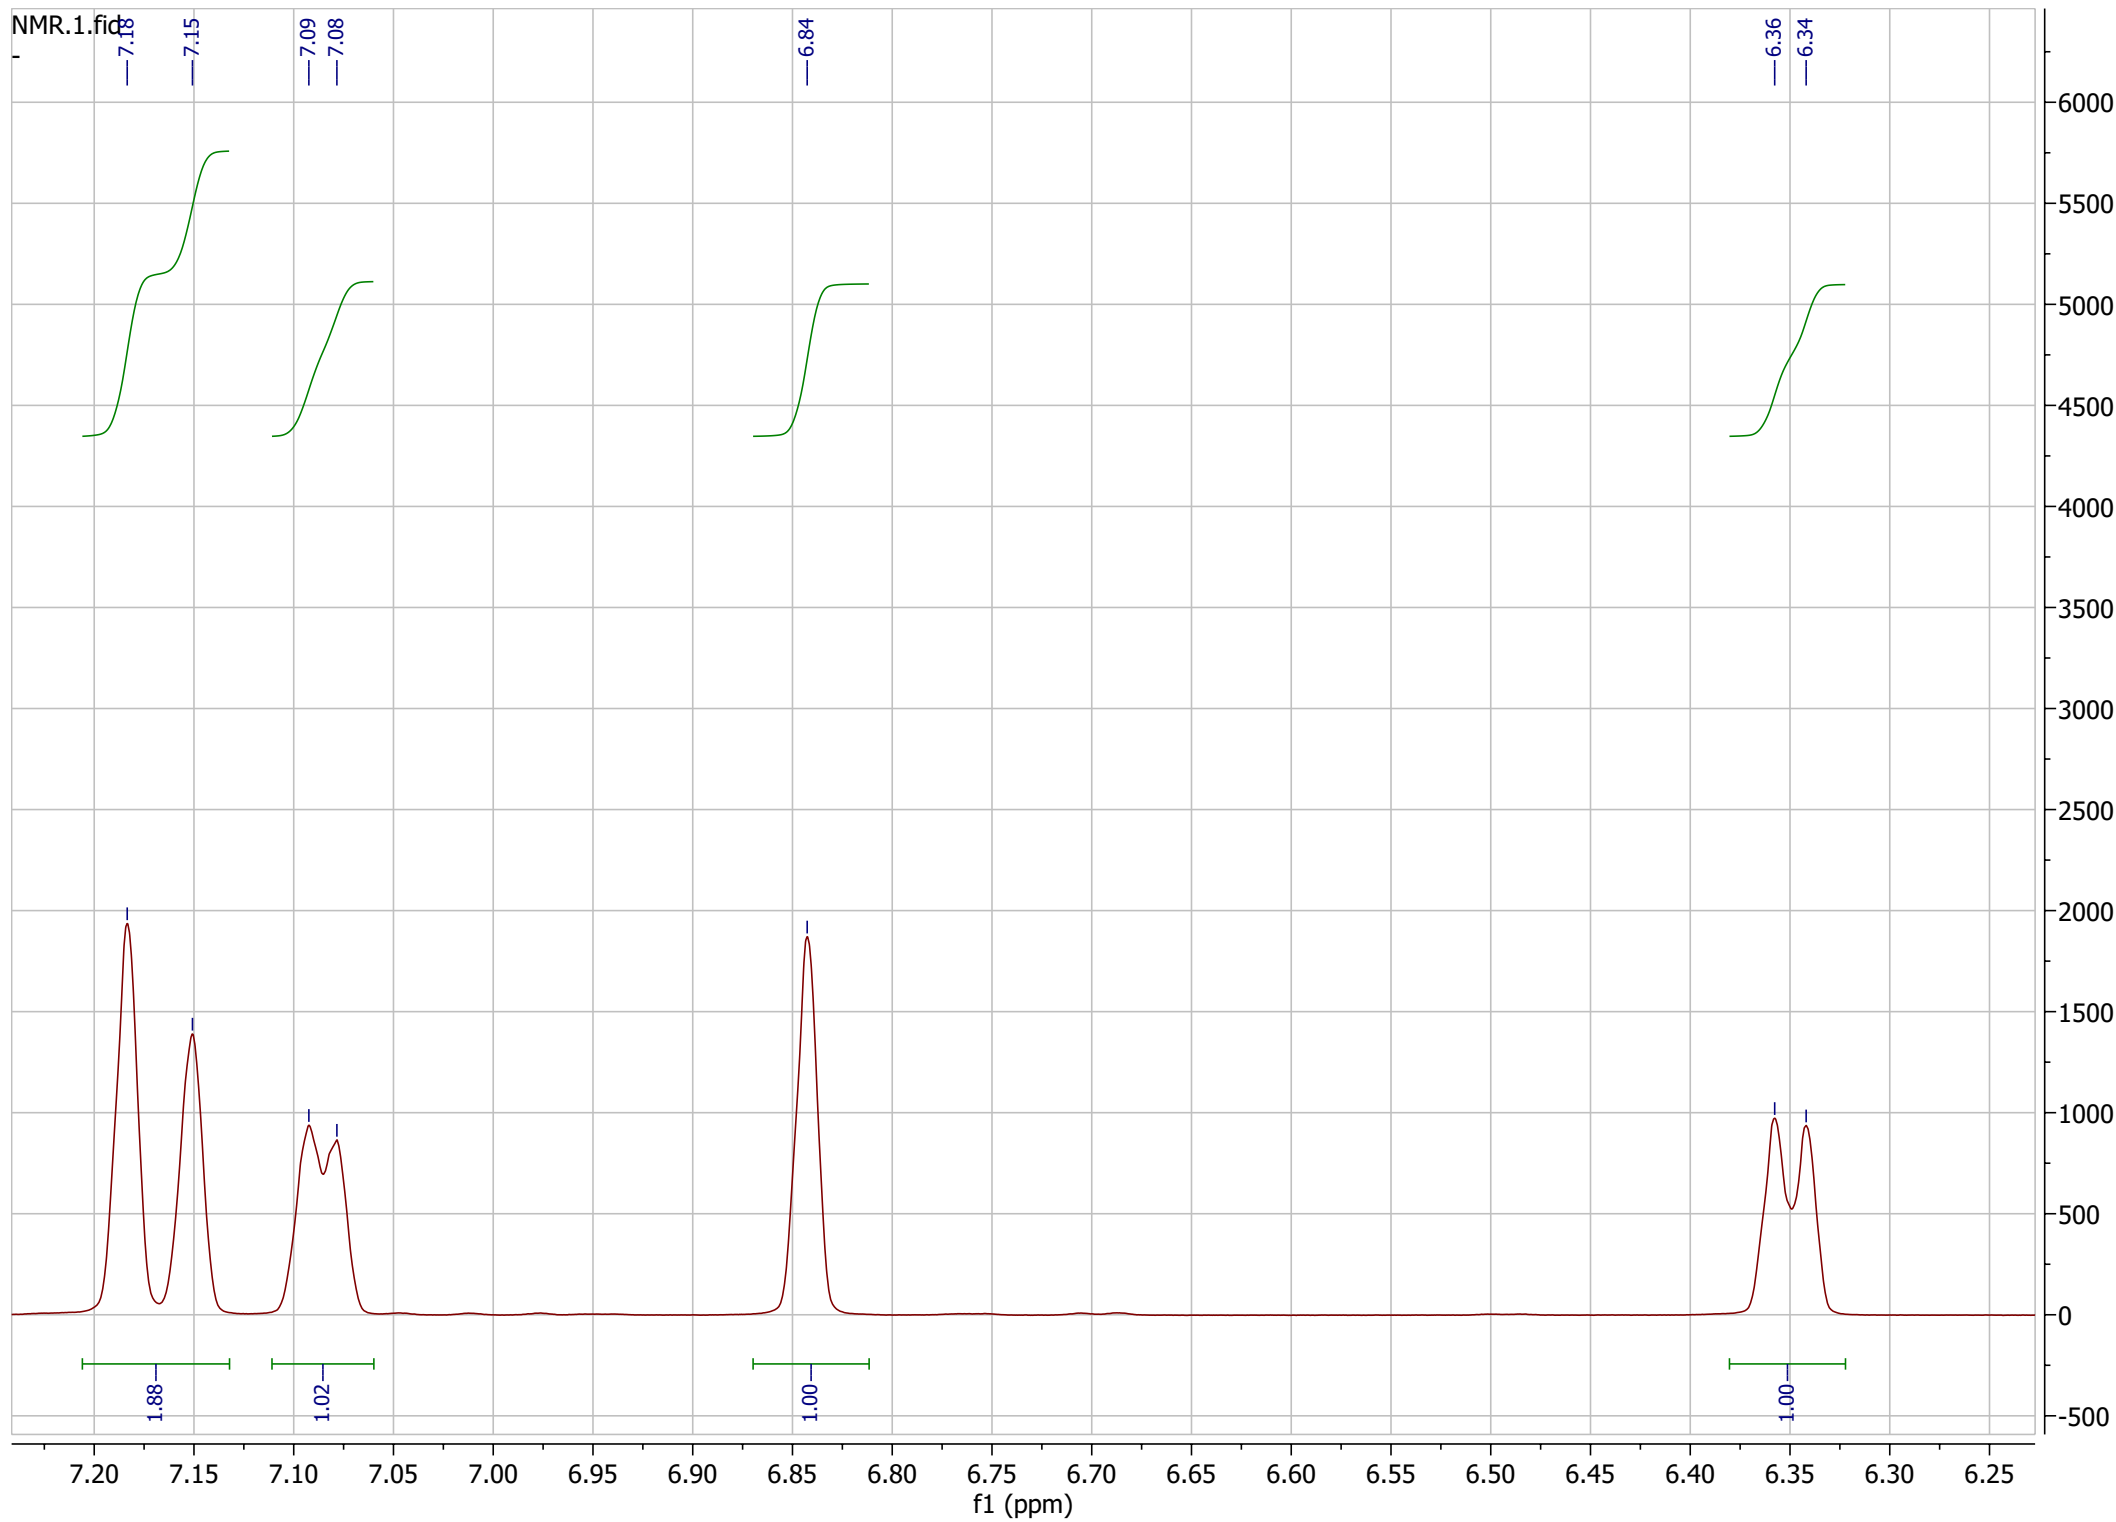

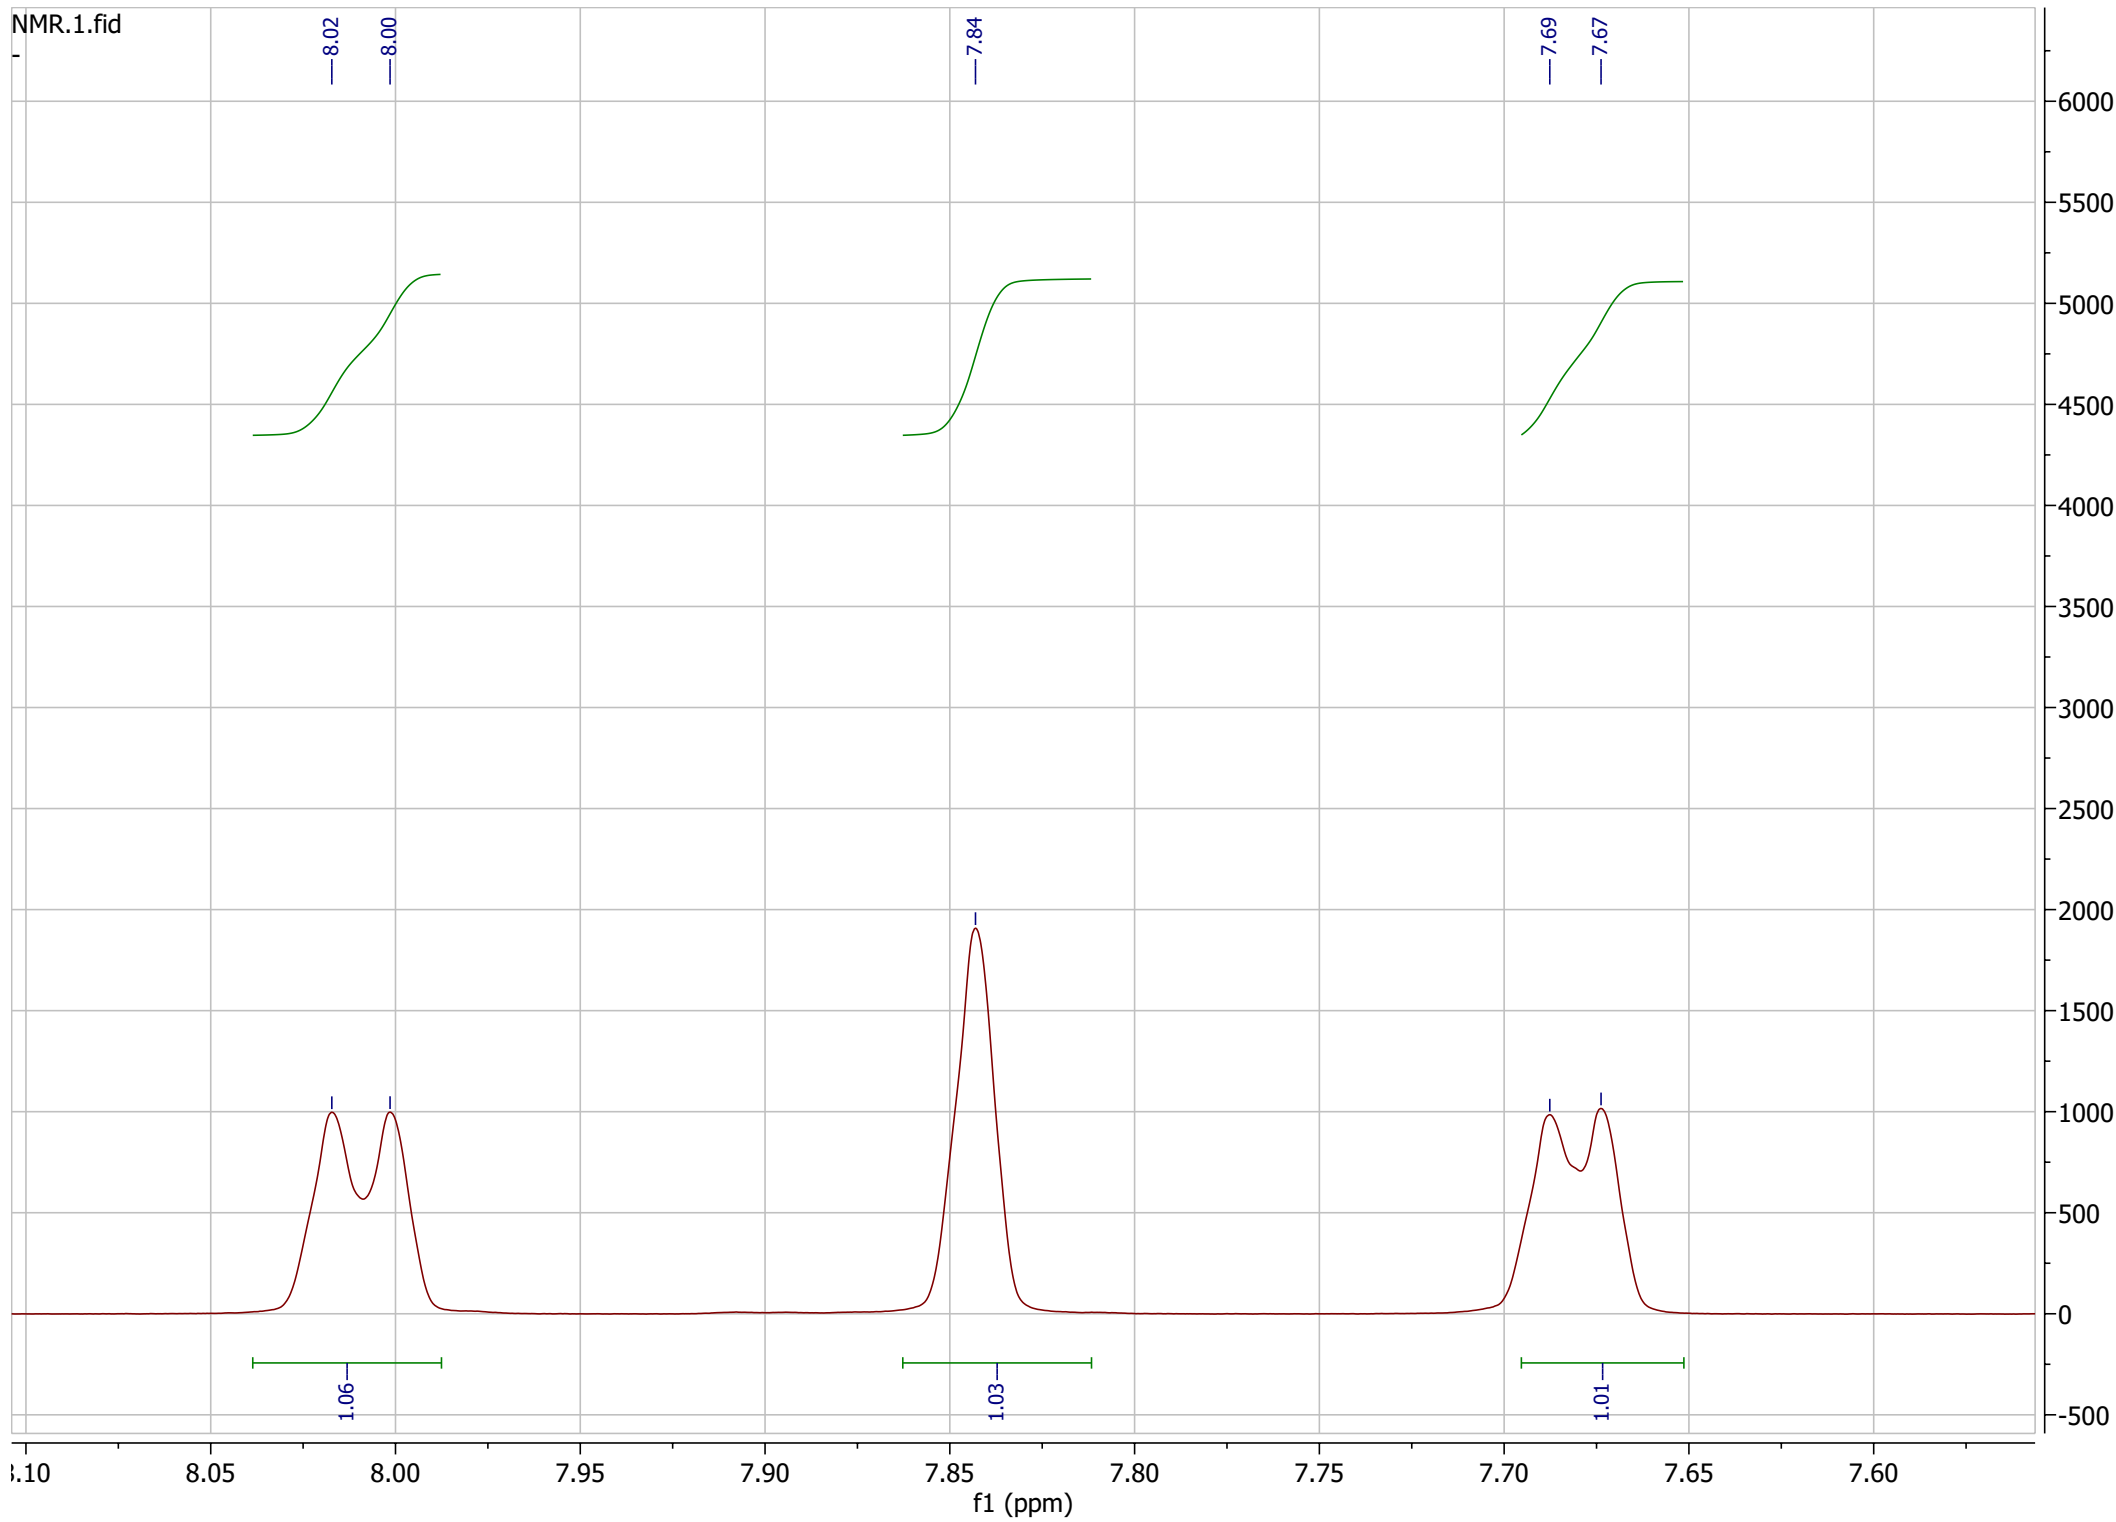

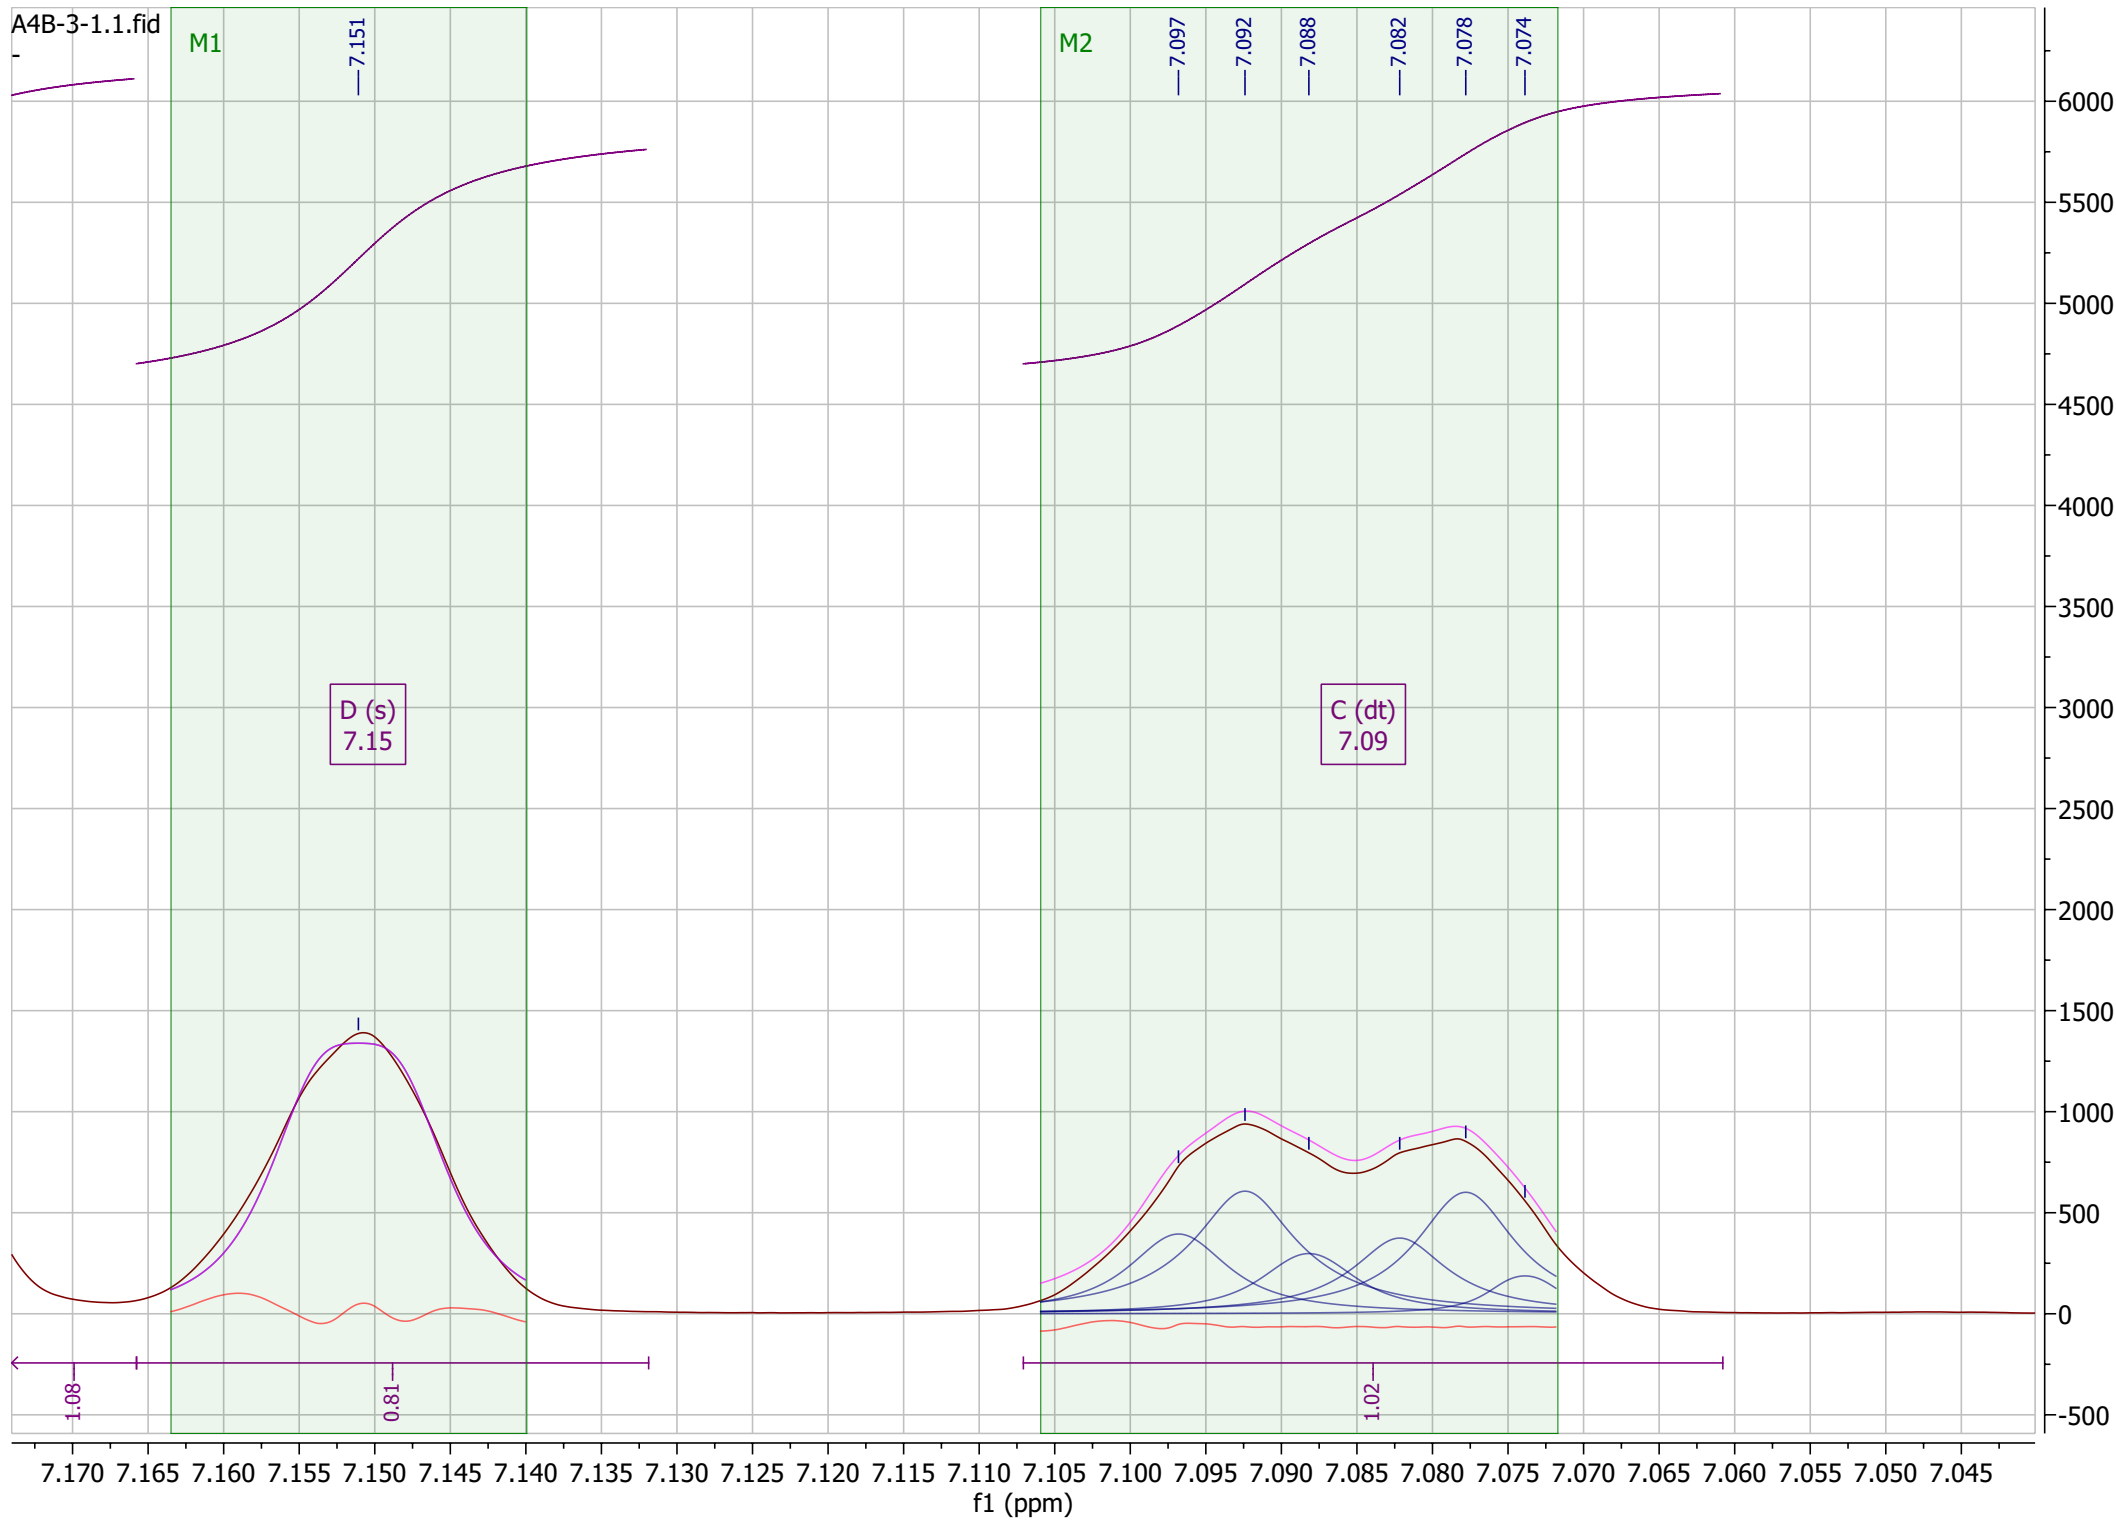

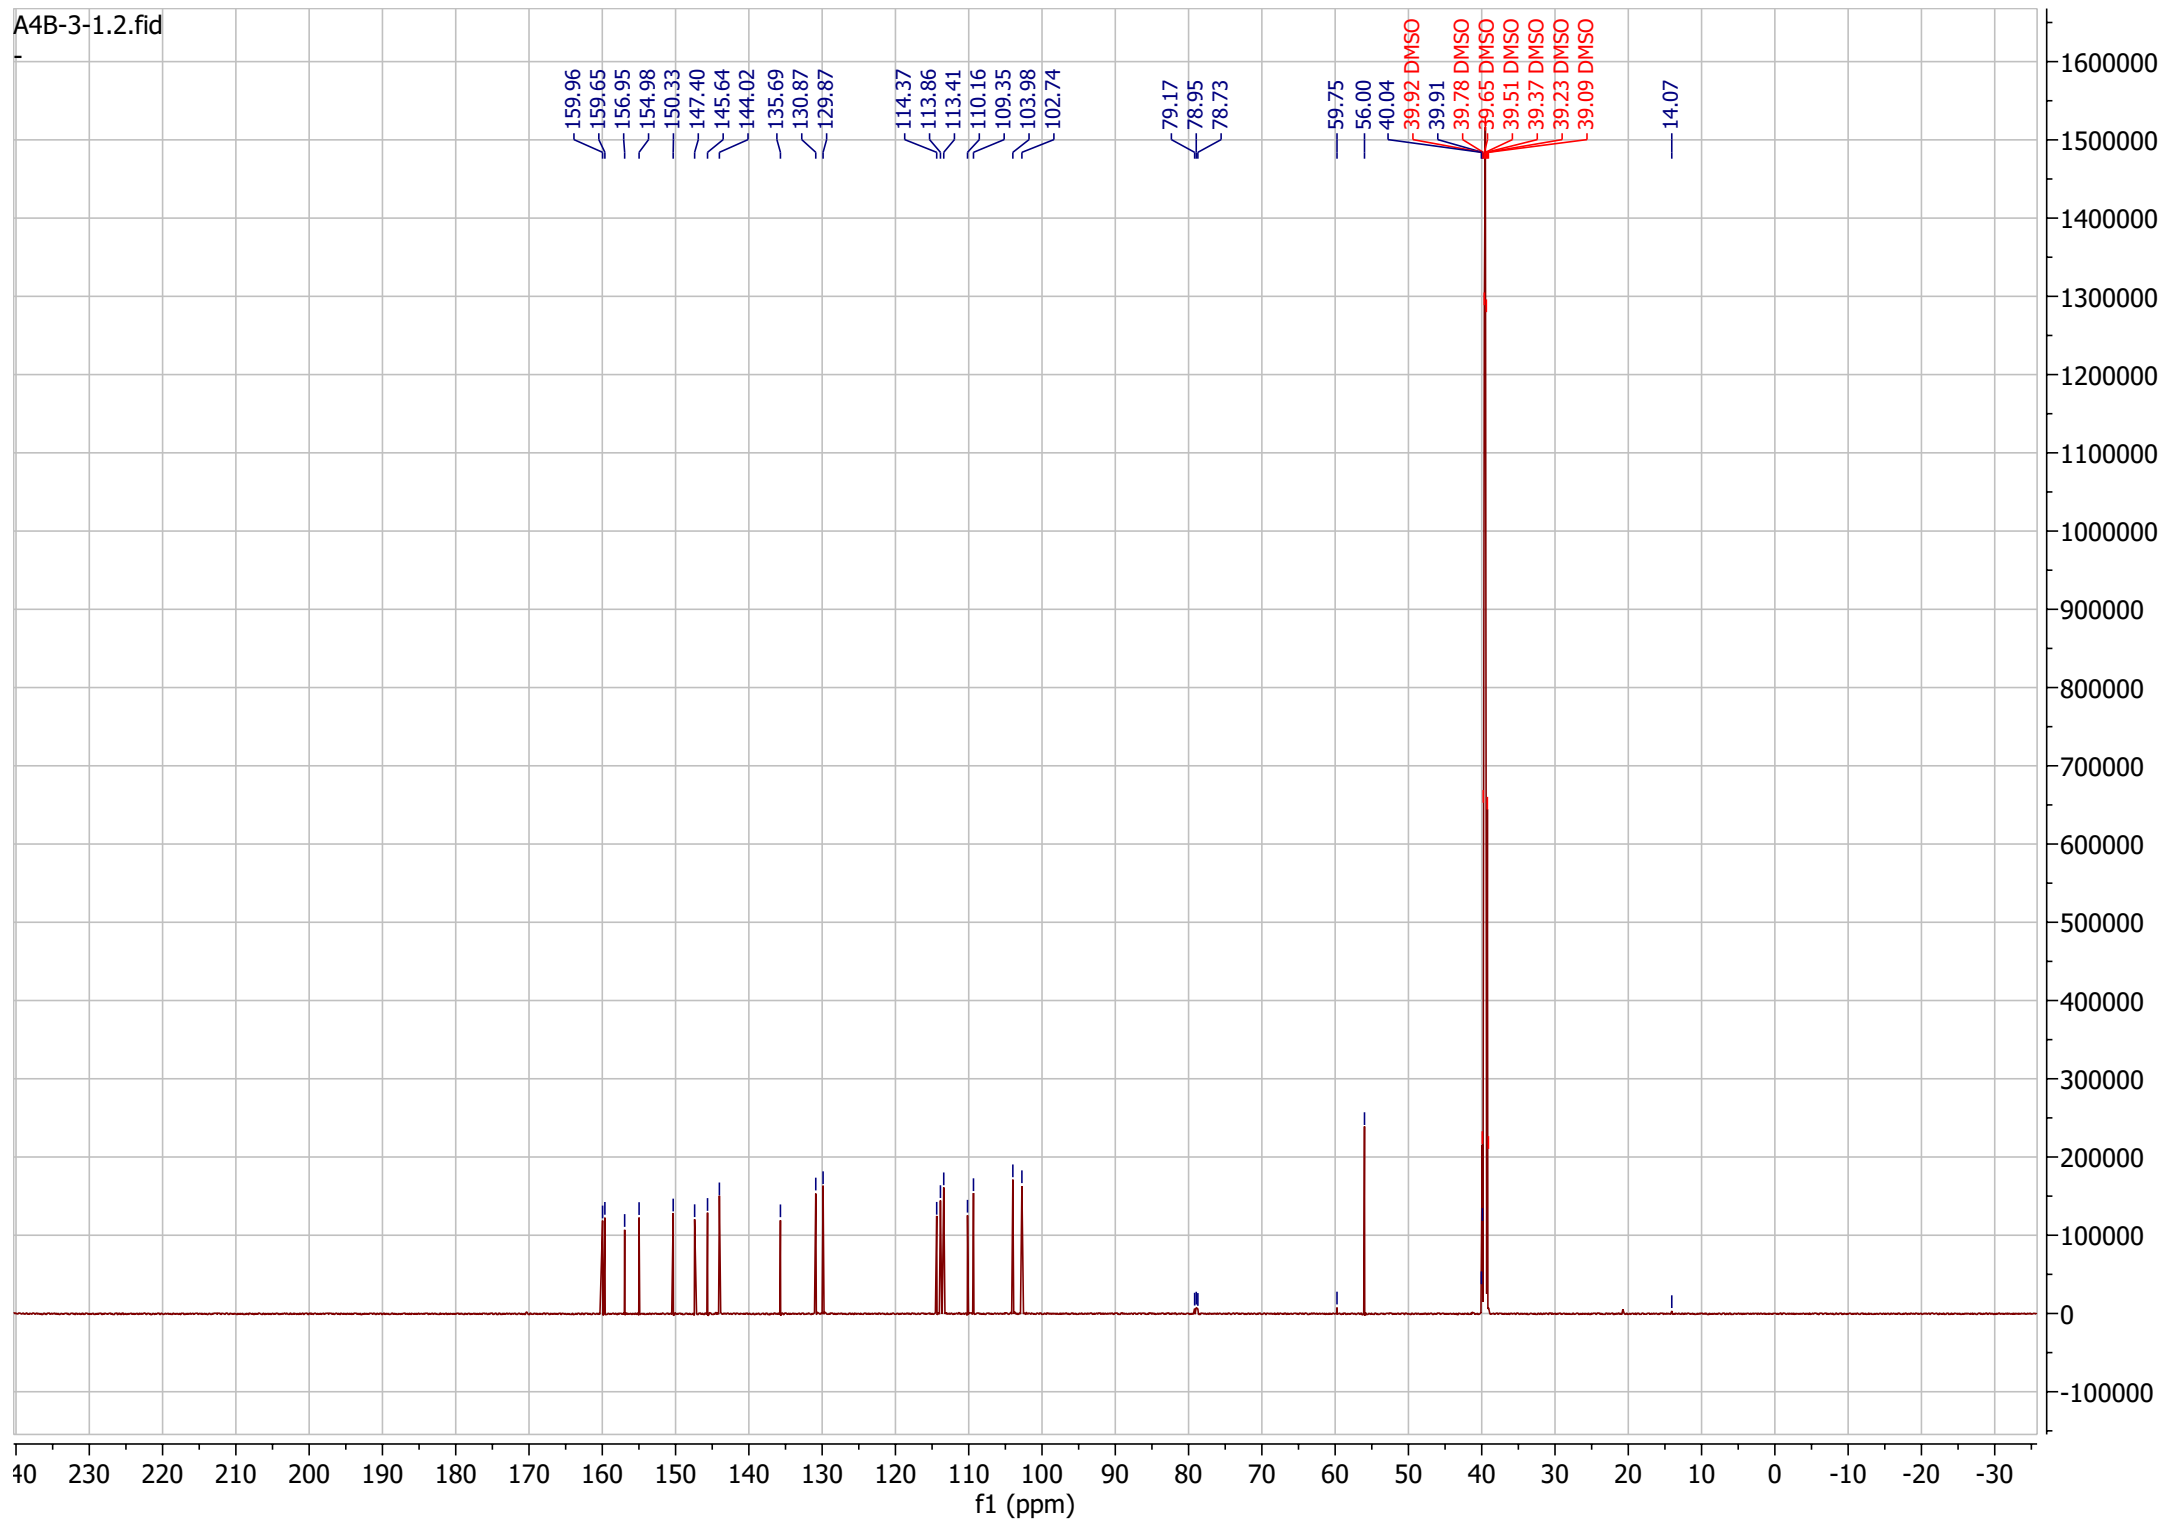



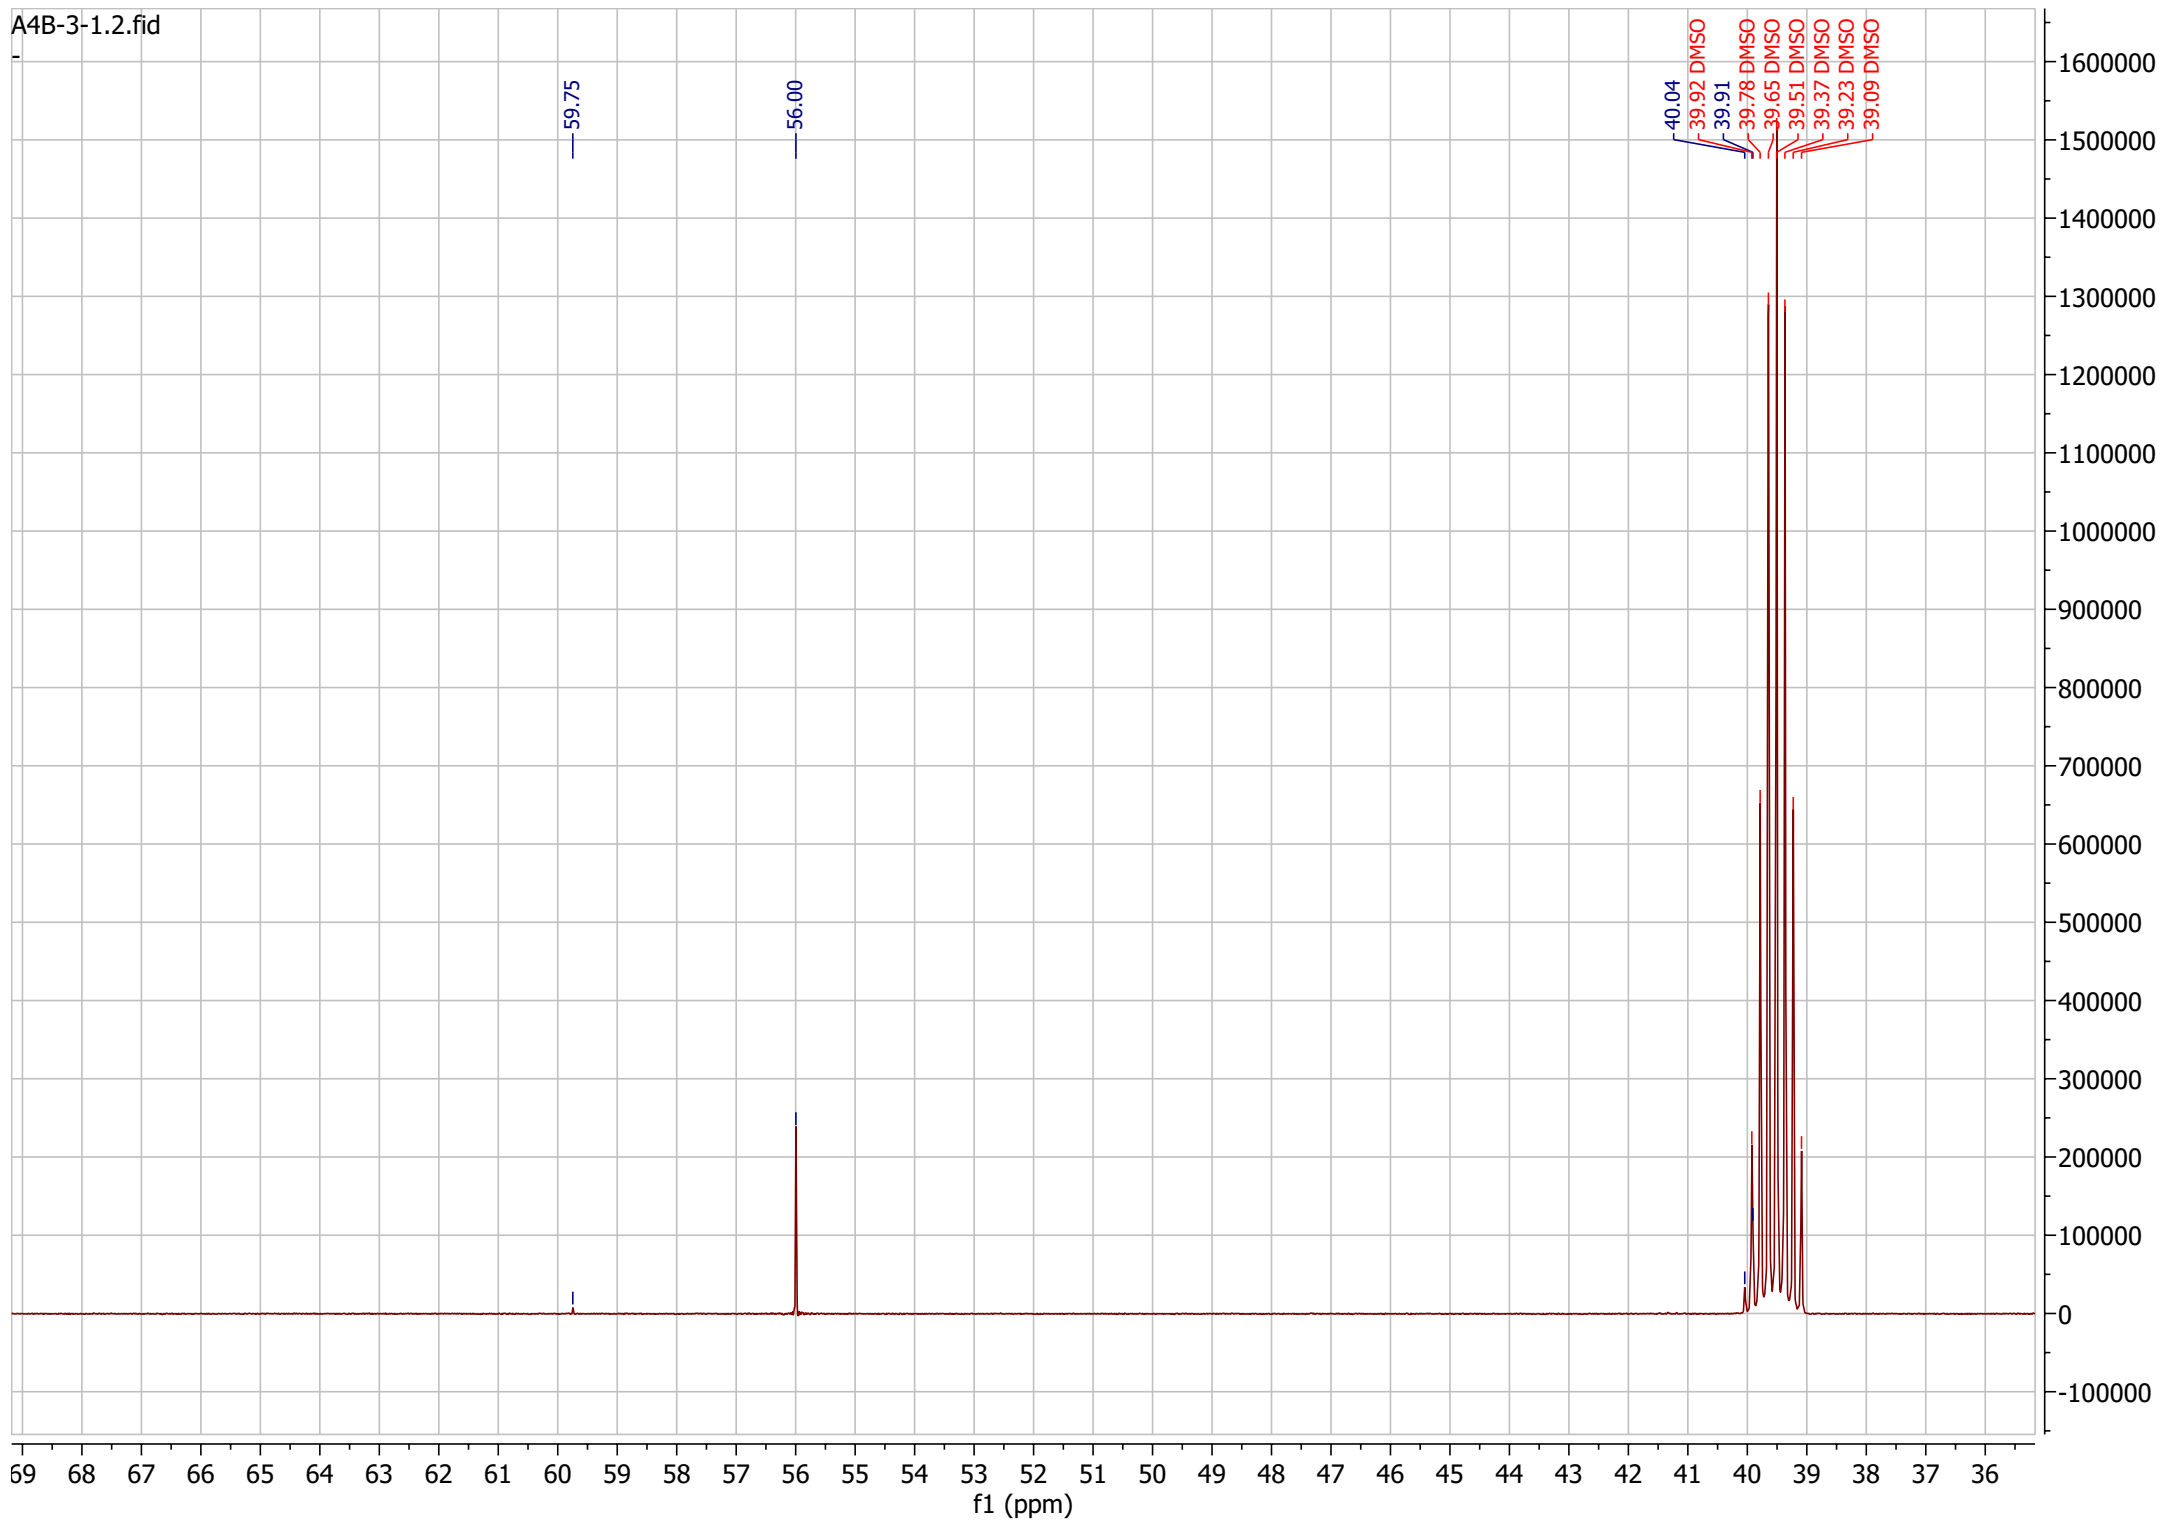

A4B-3-1.2.fid

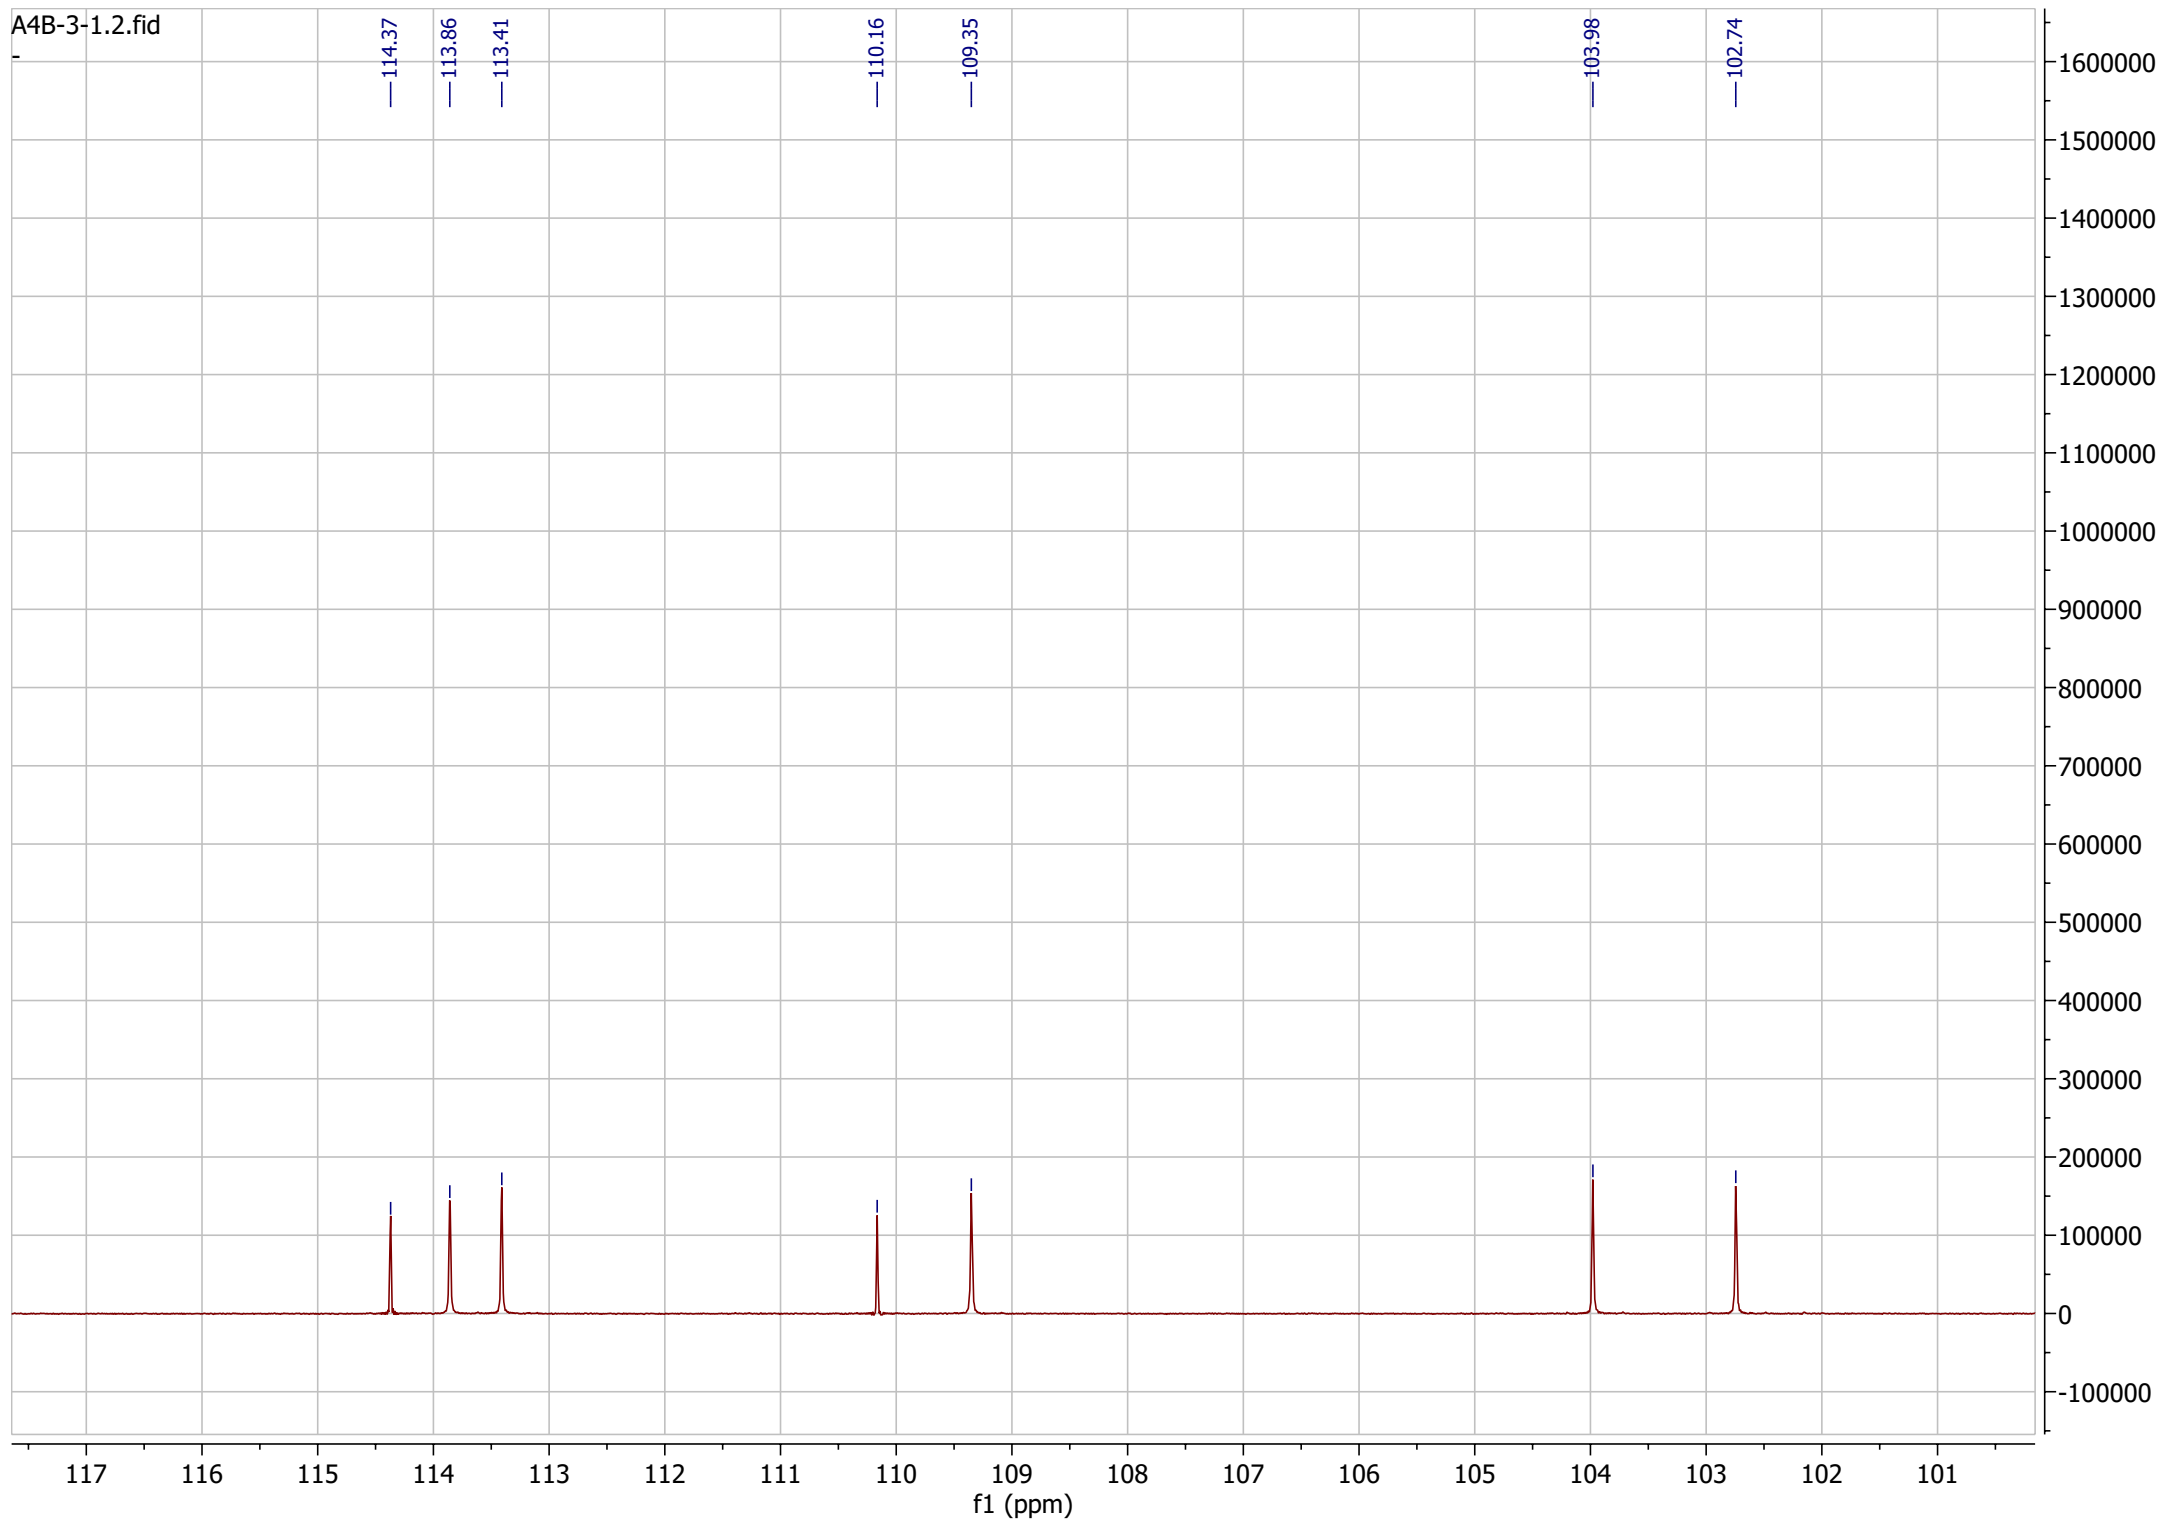

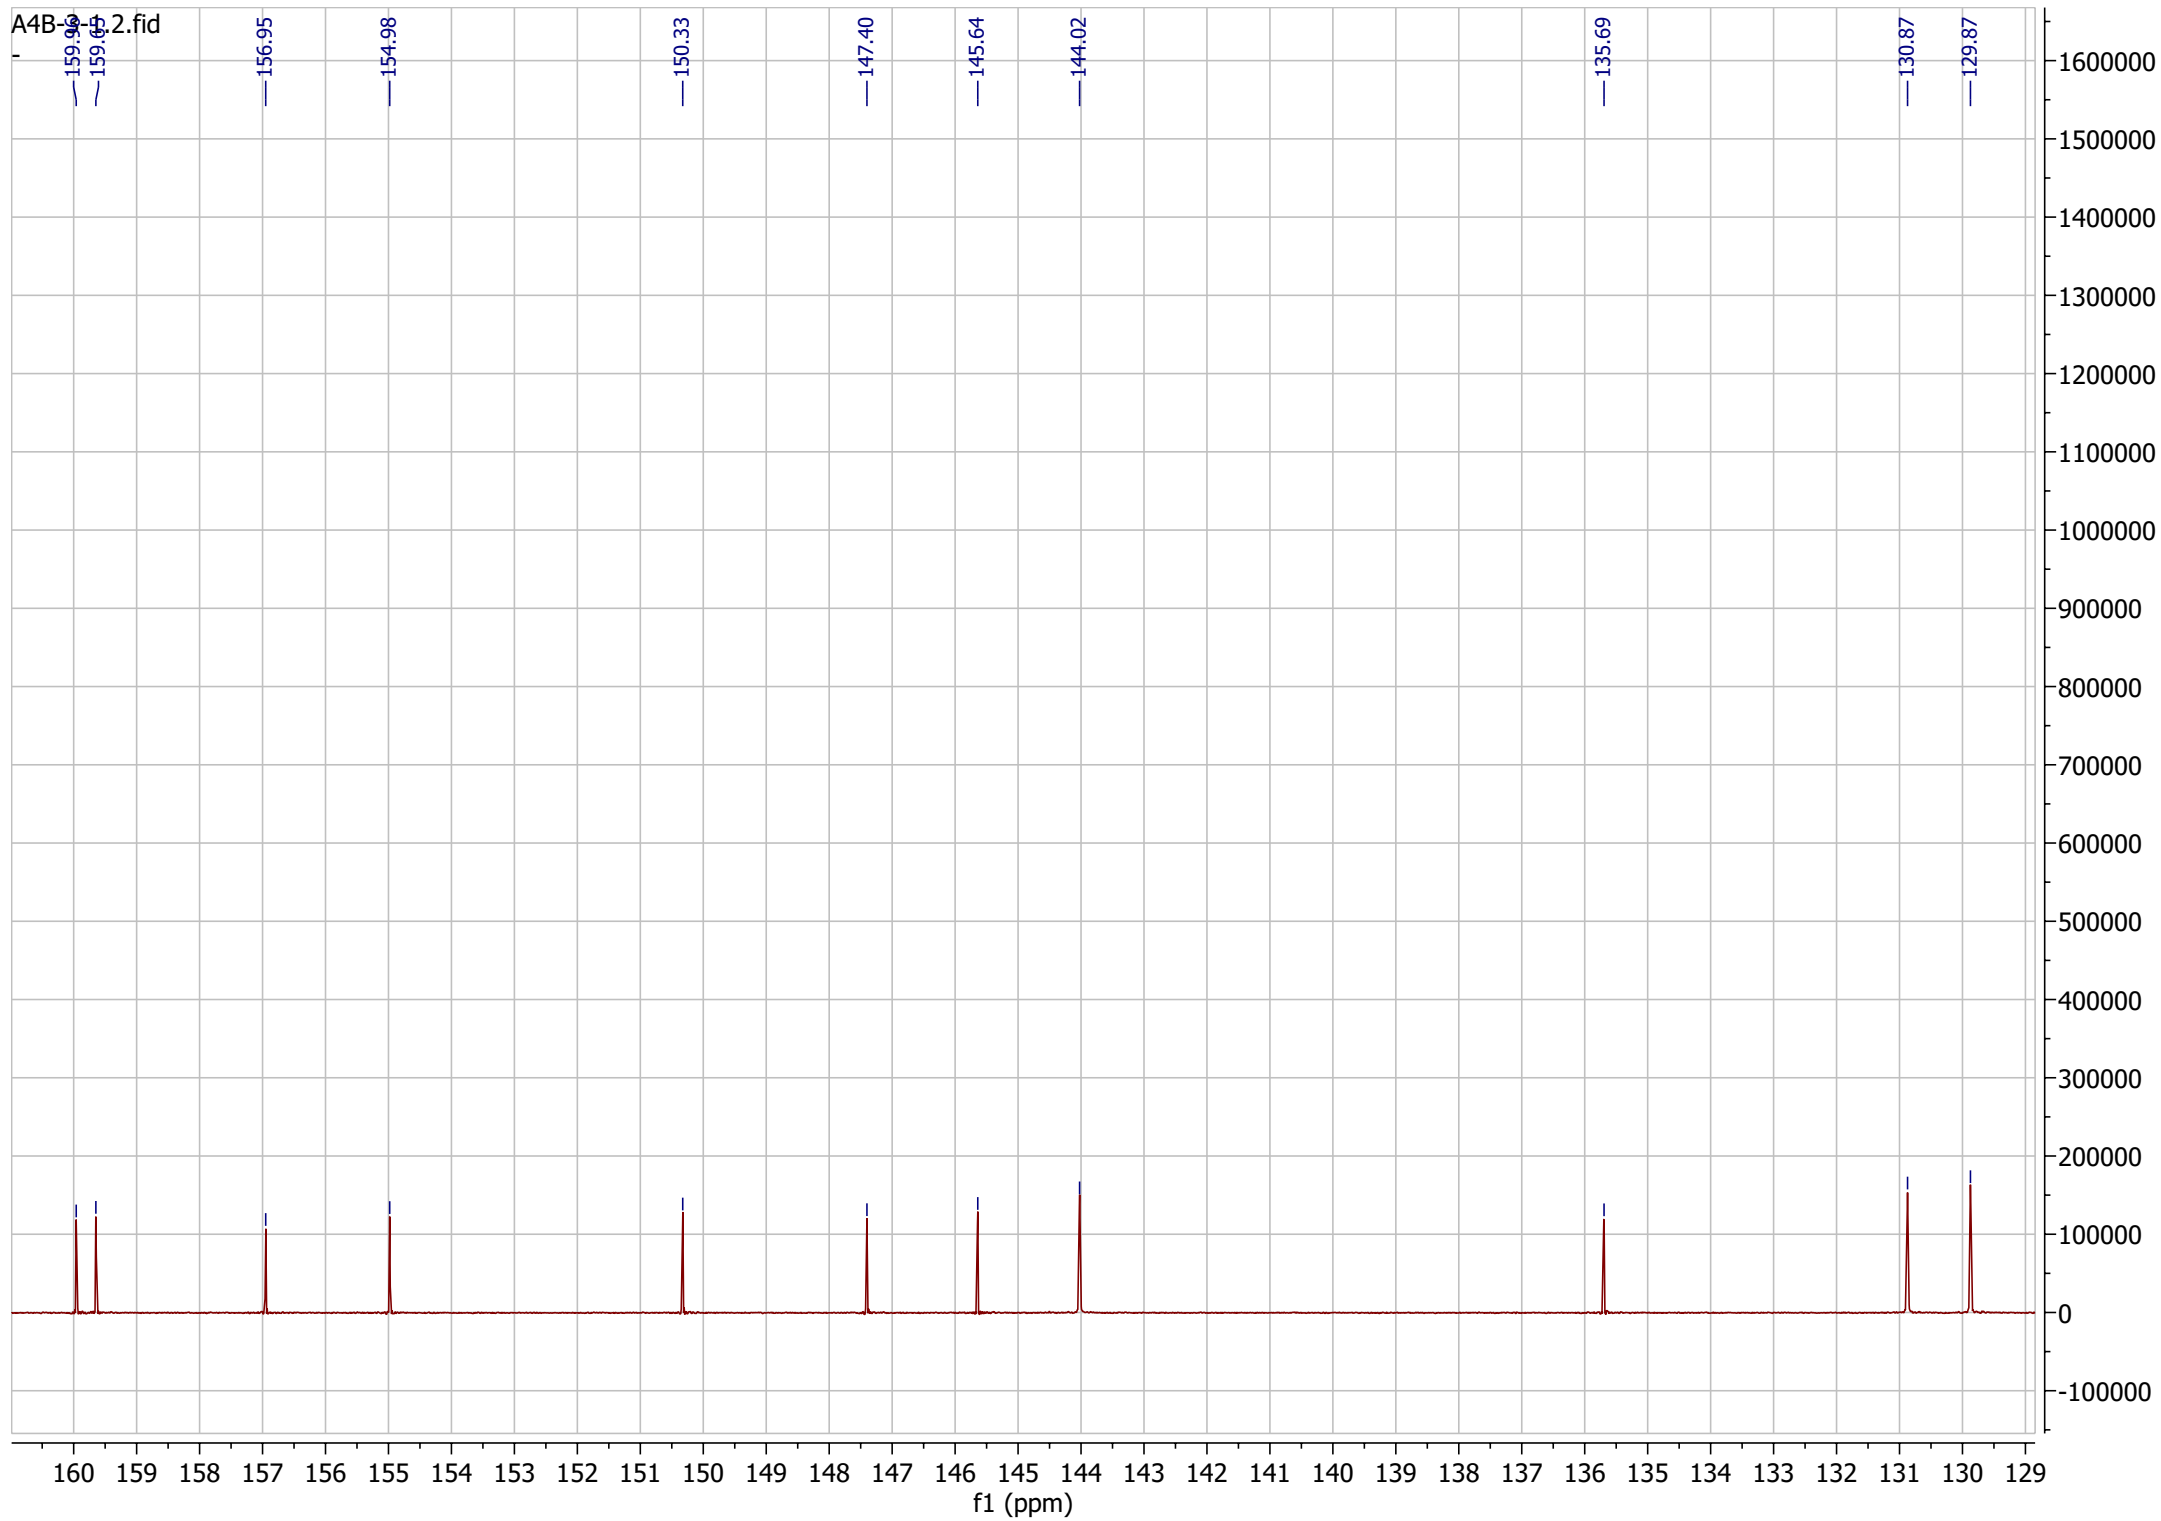

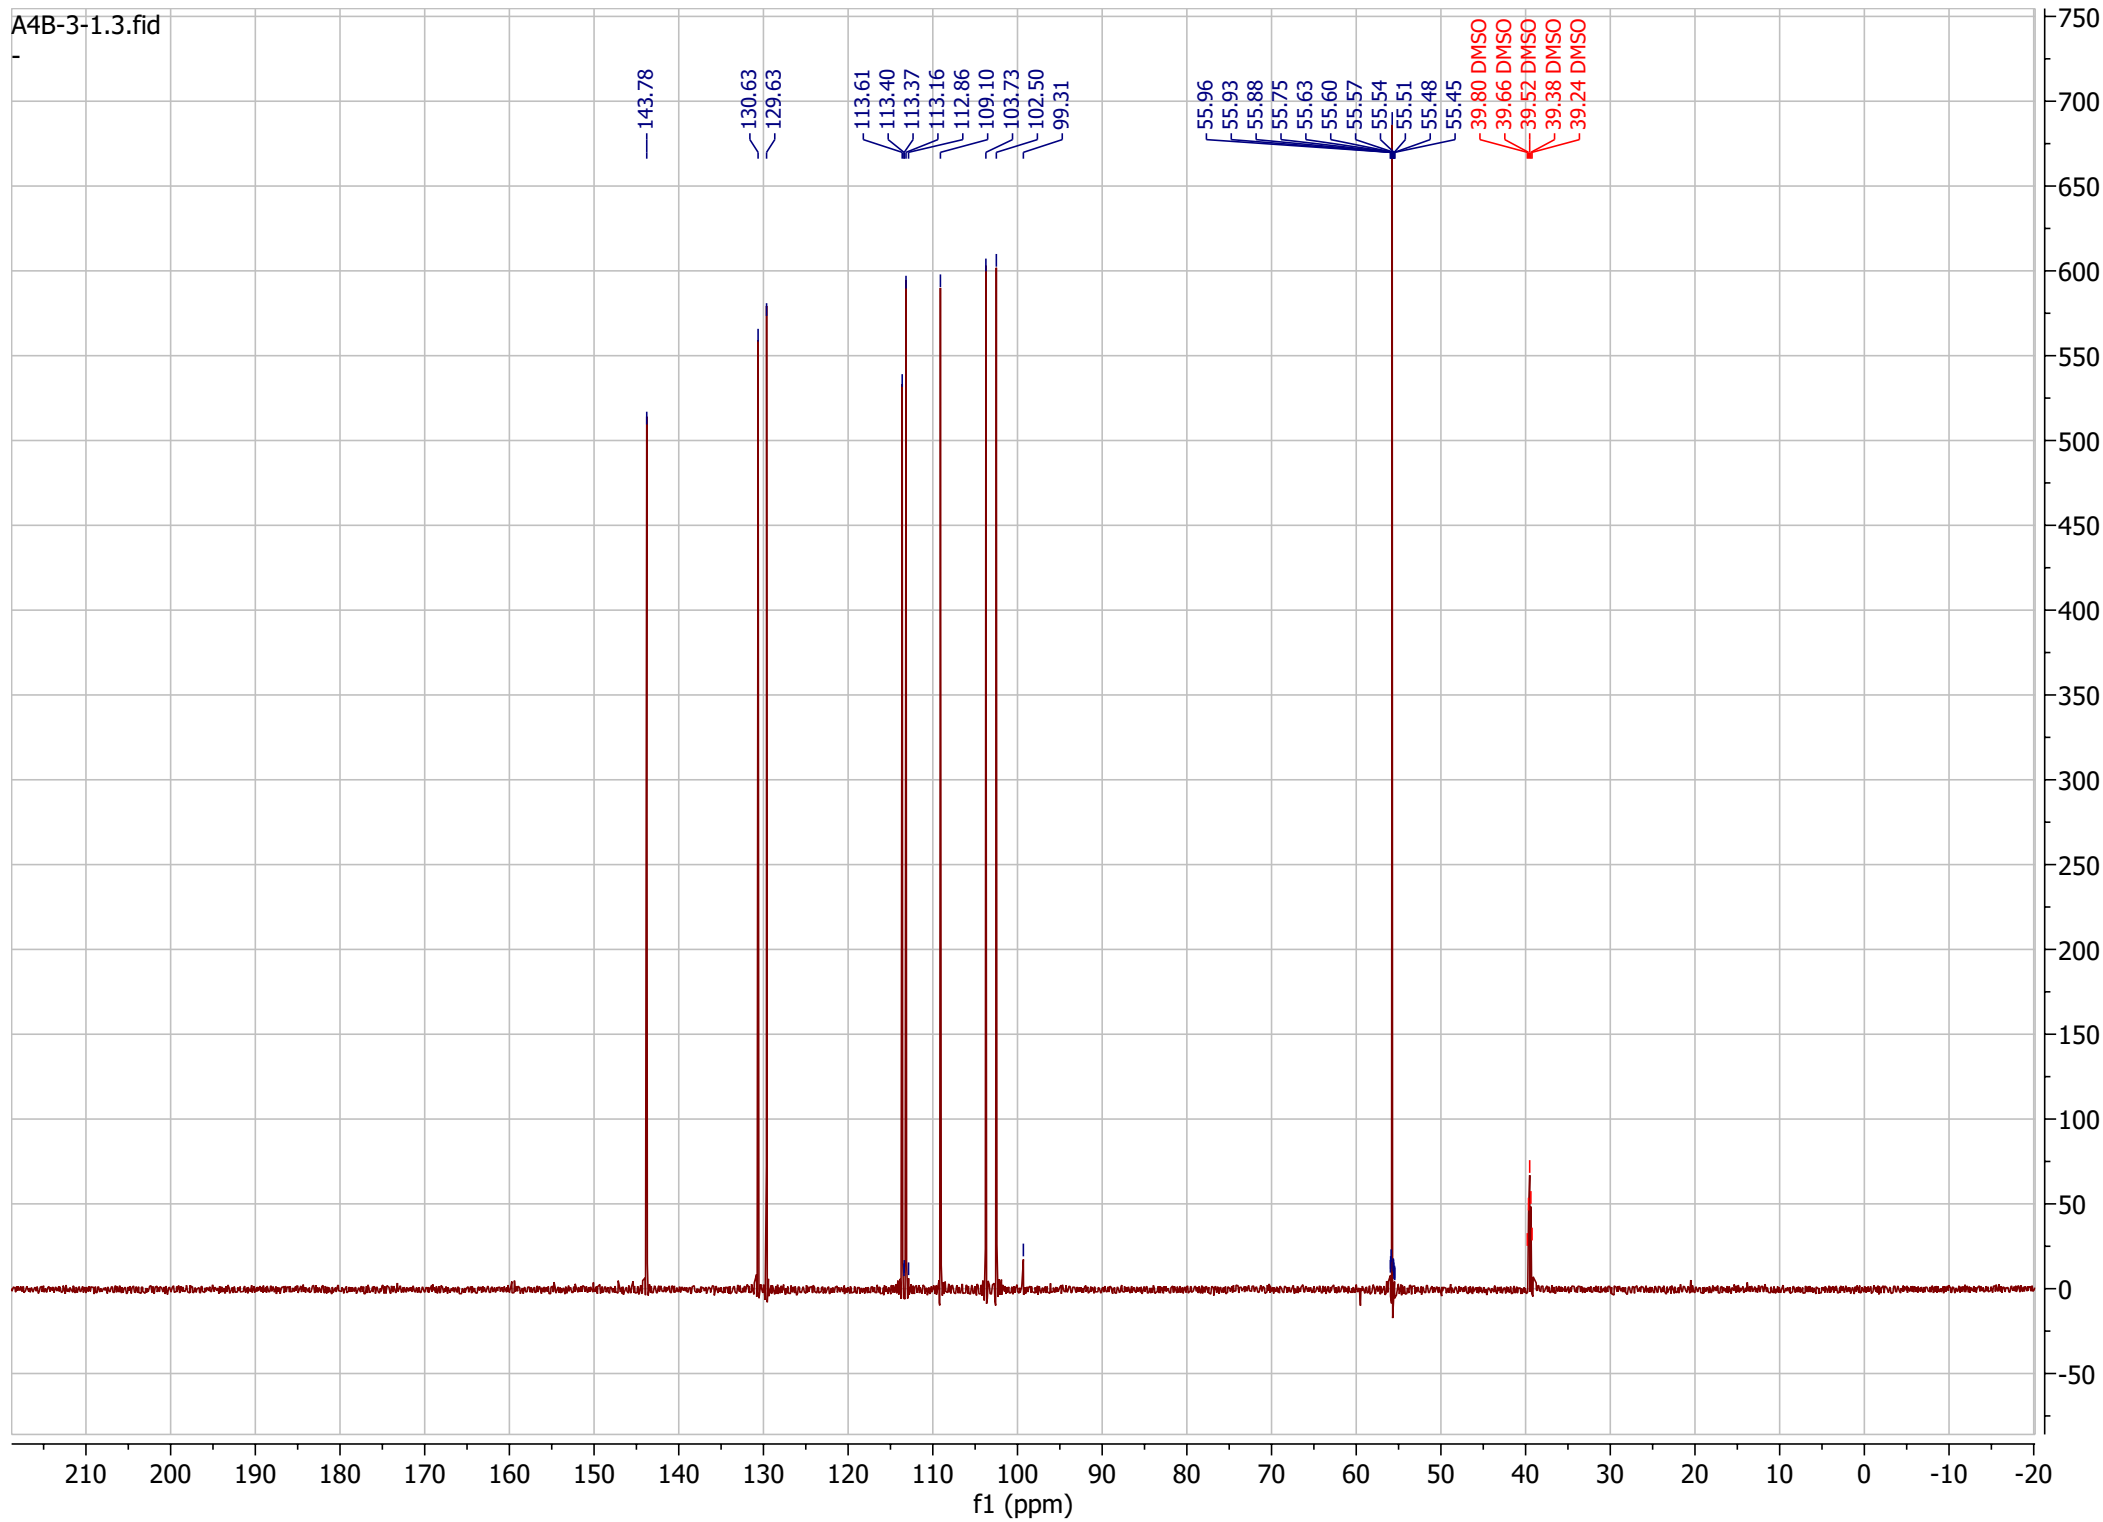

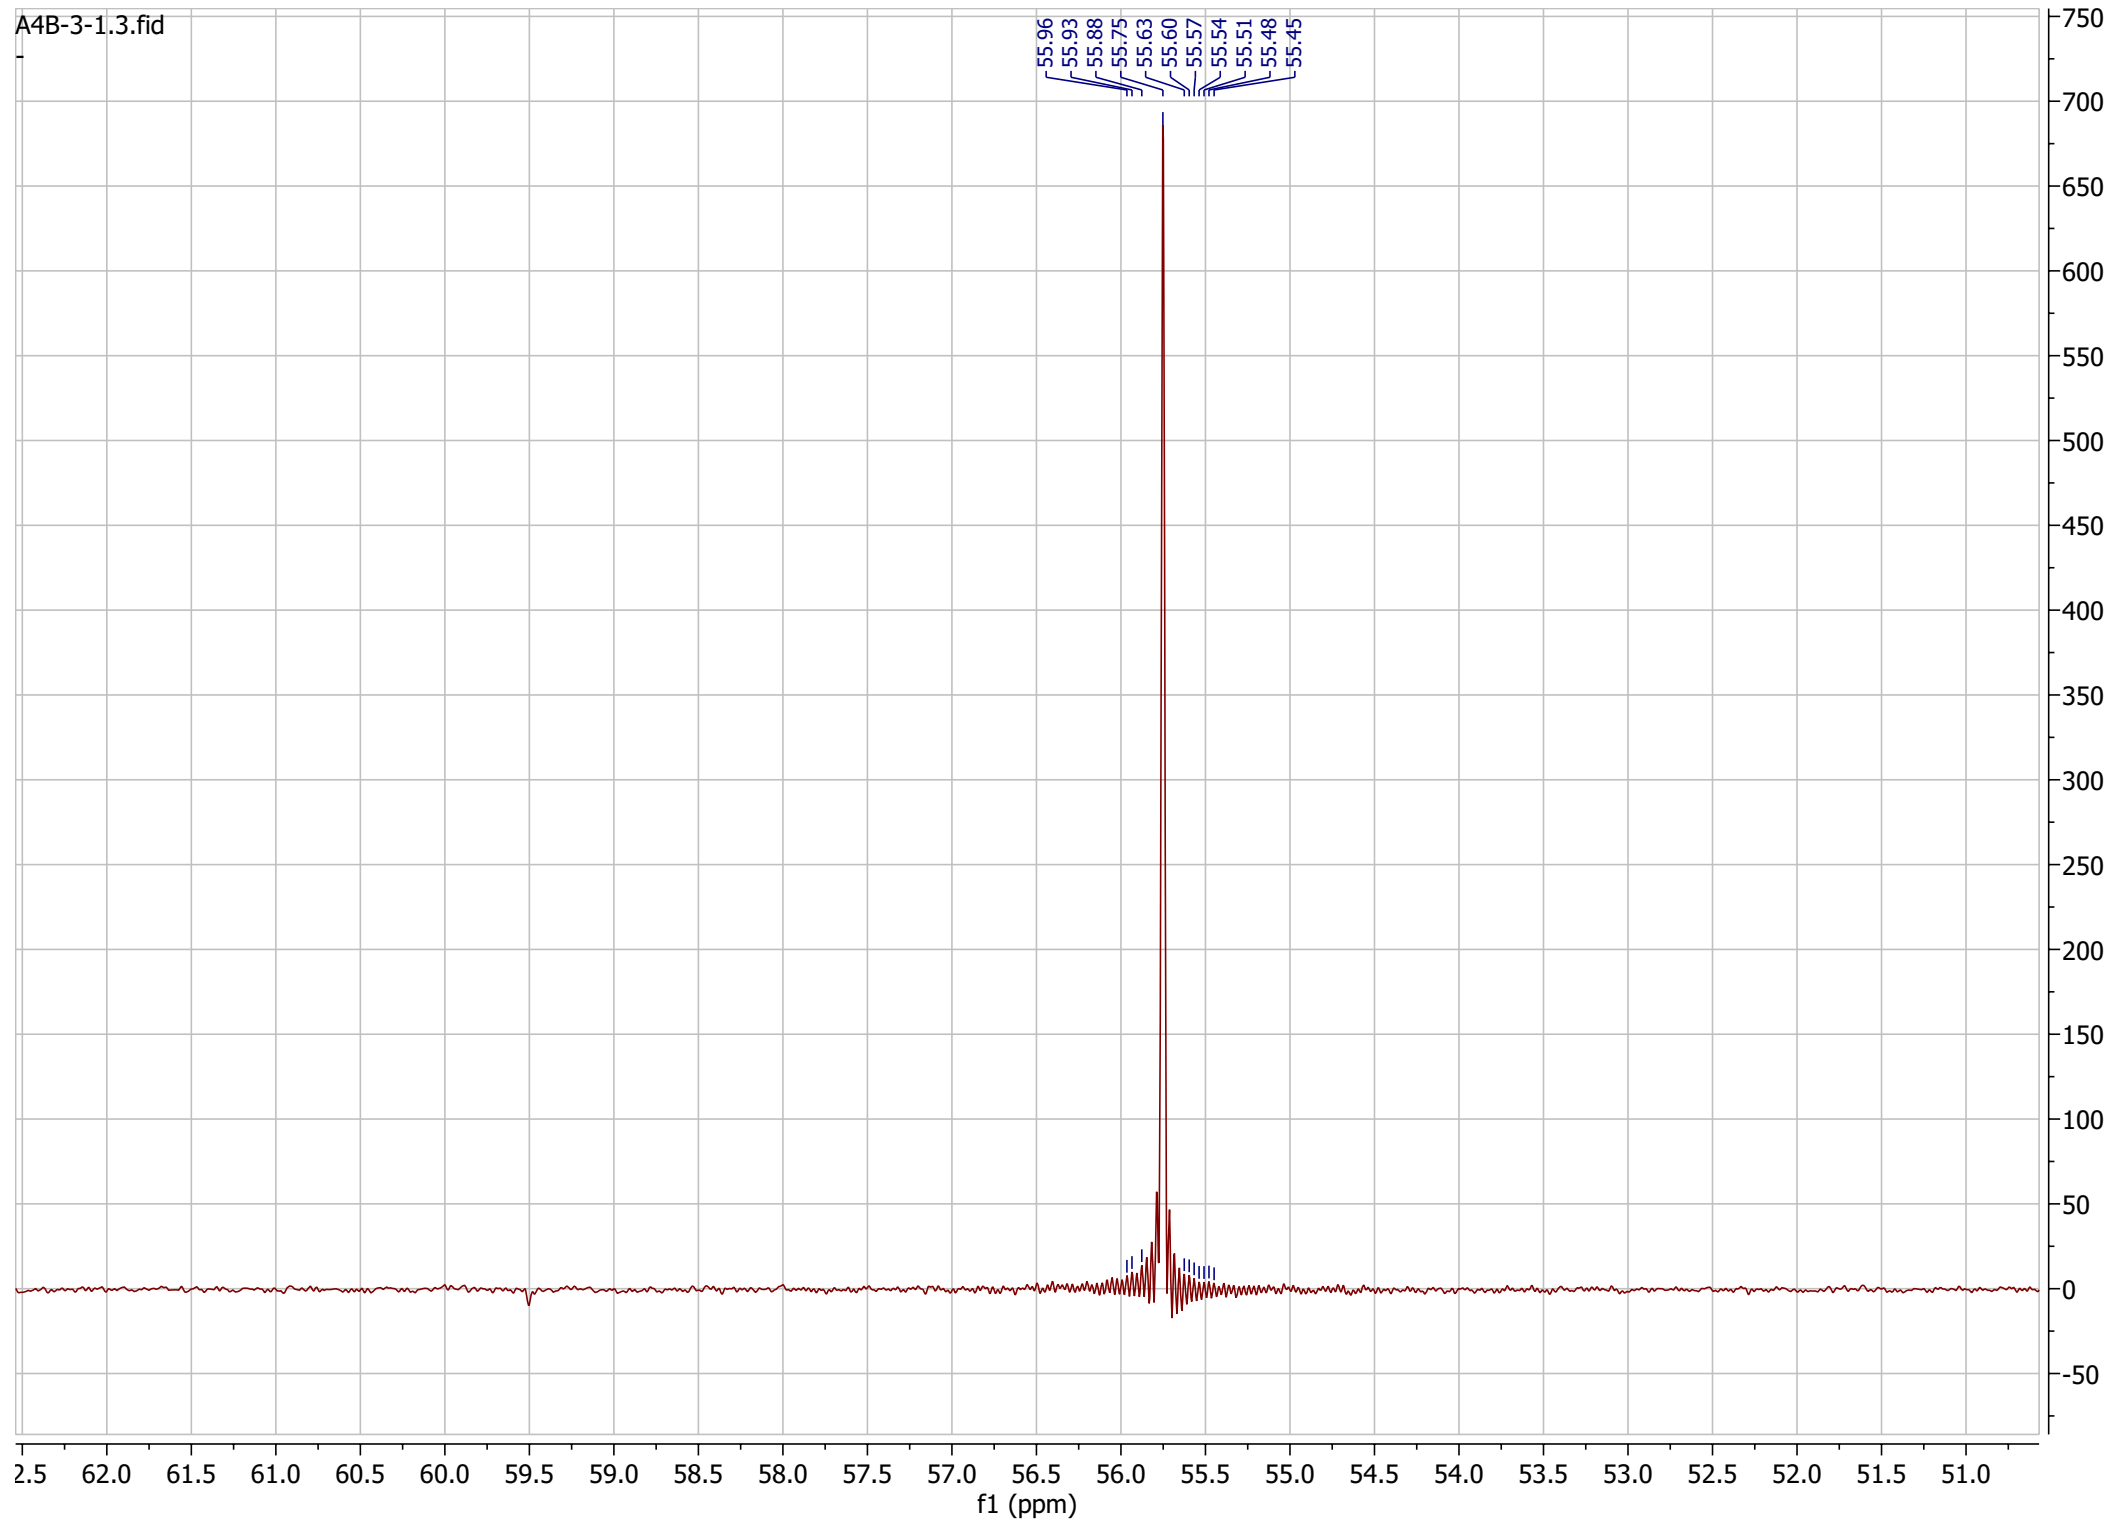

A4B-3-1.3.fid

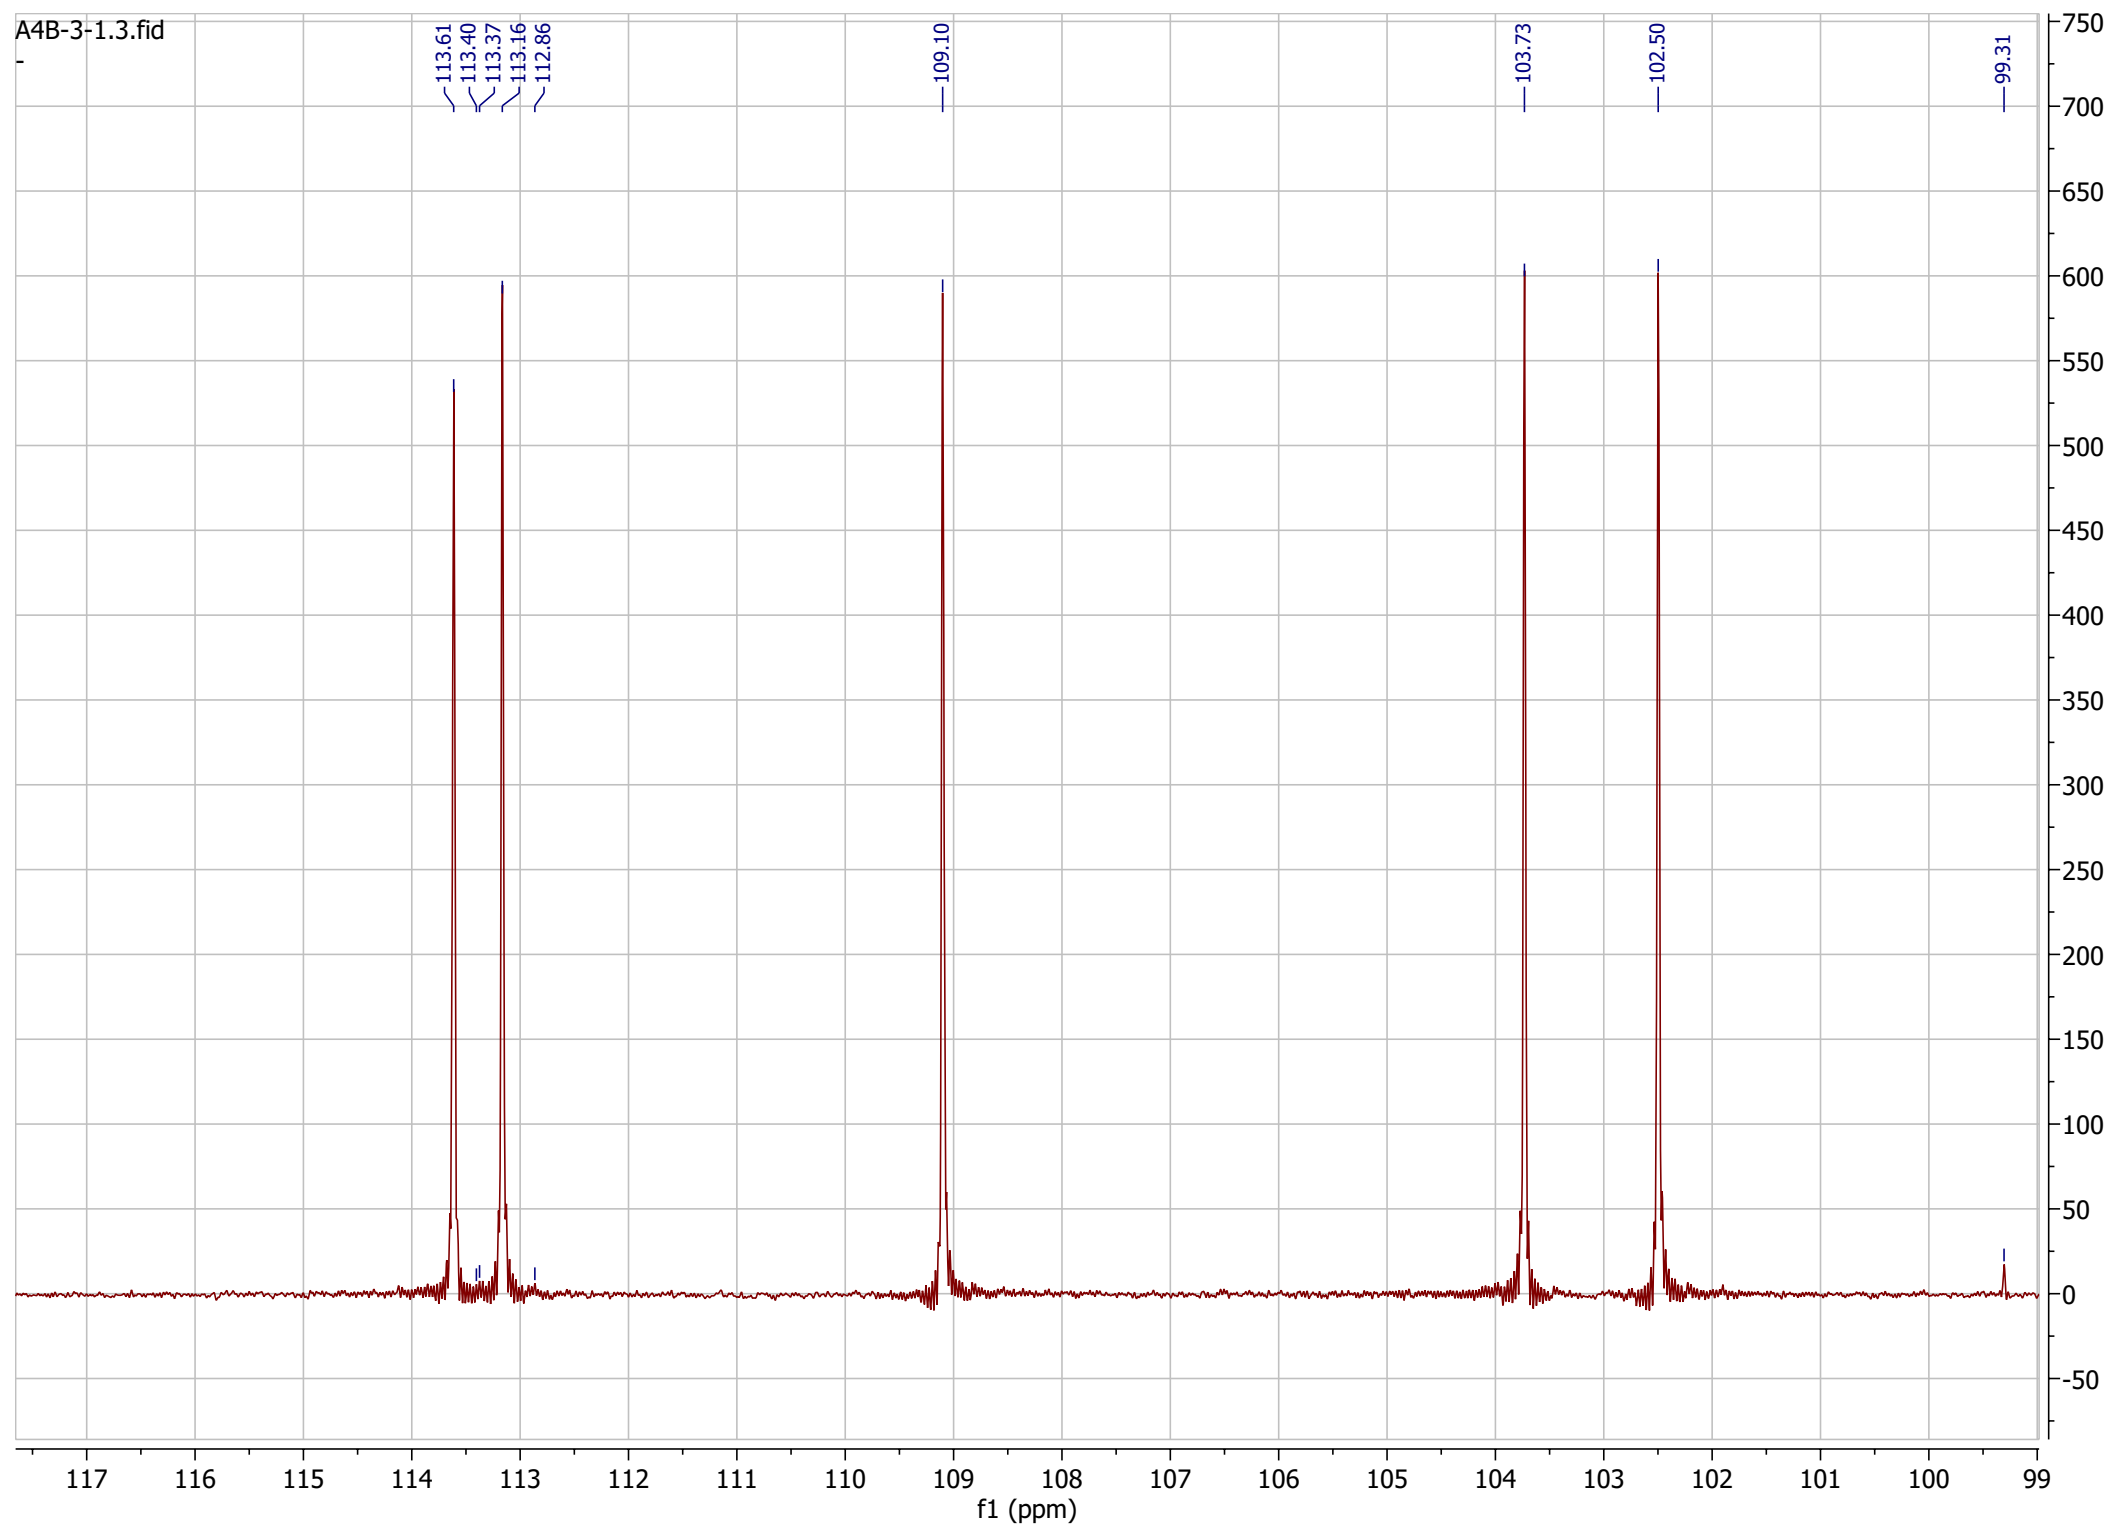

A4B-3-1.3.fid

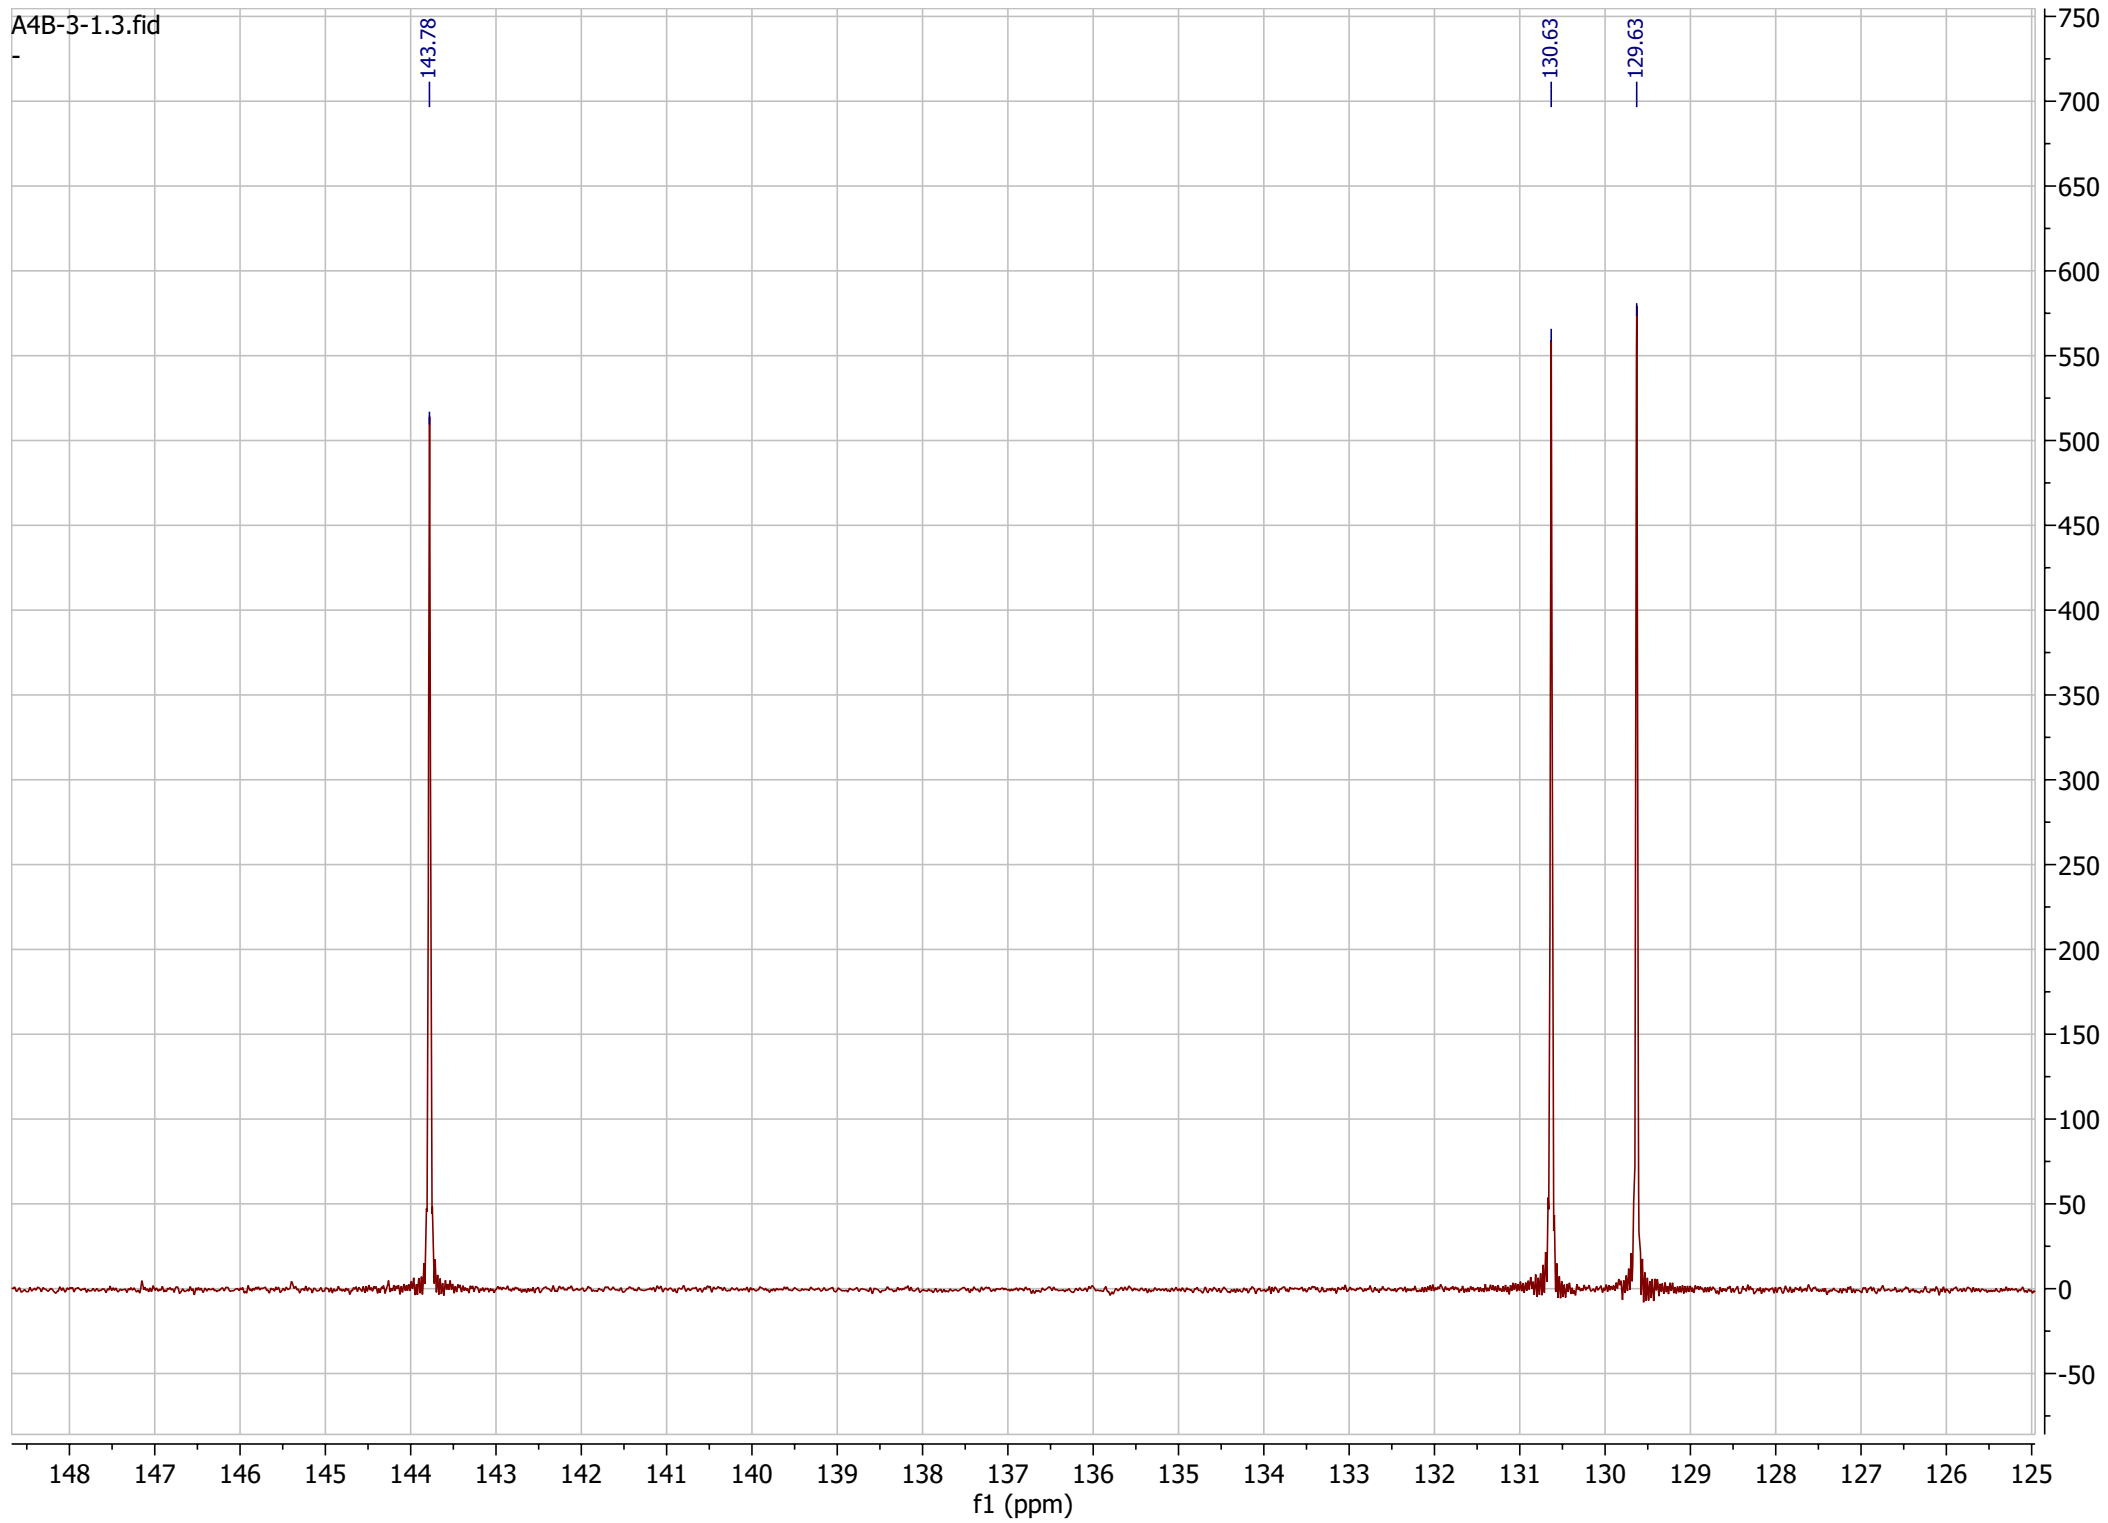

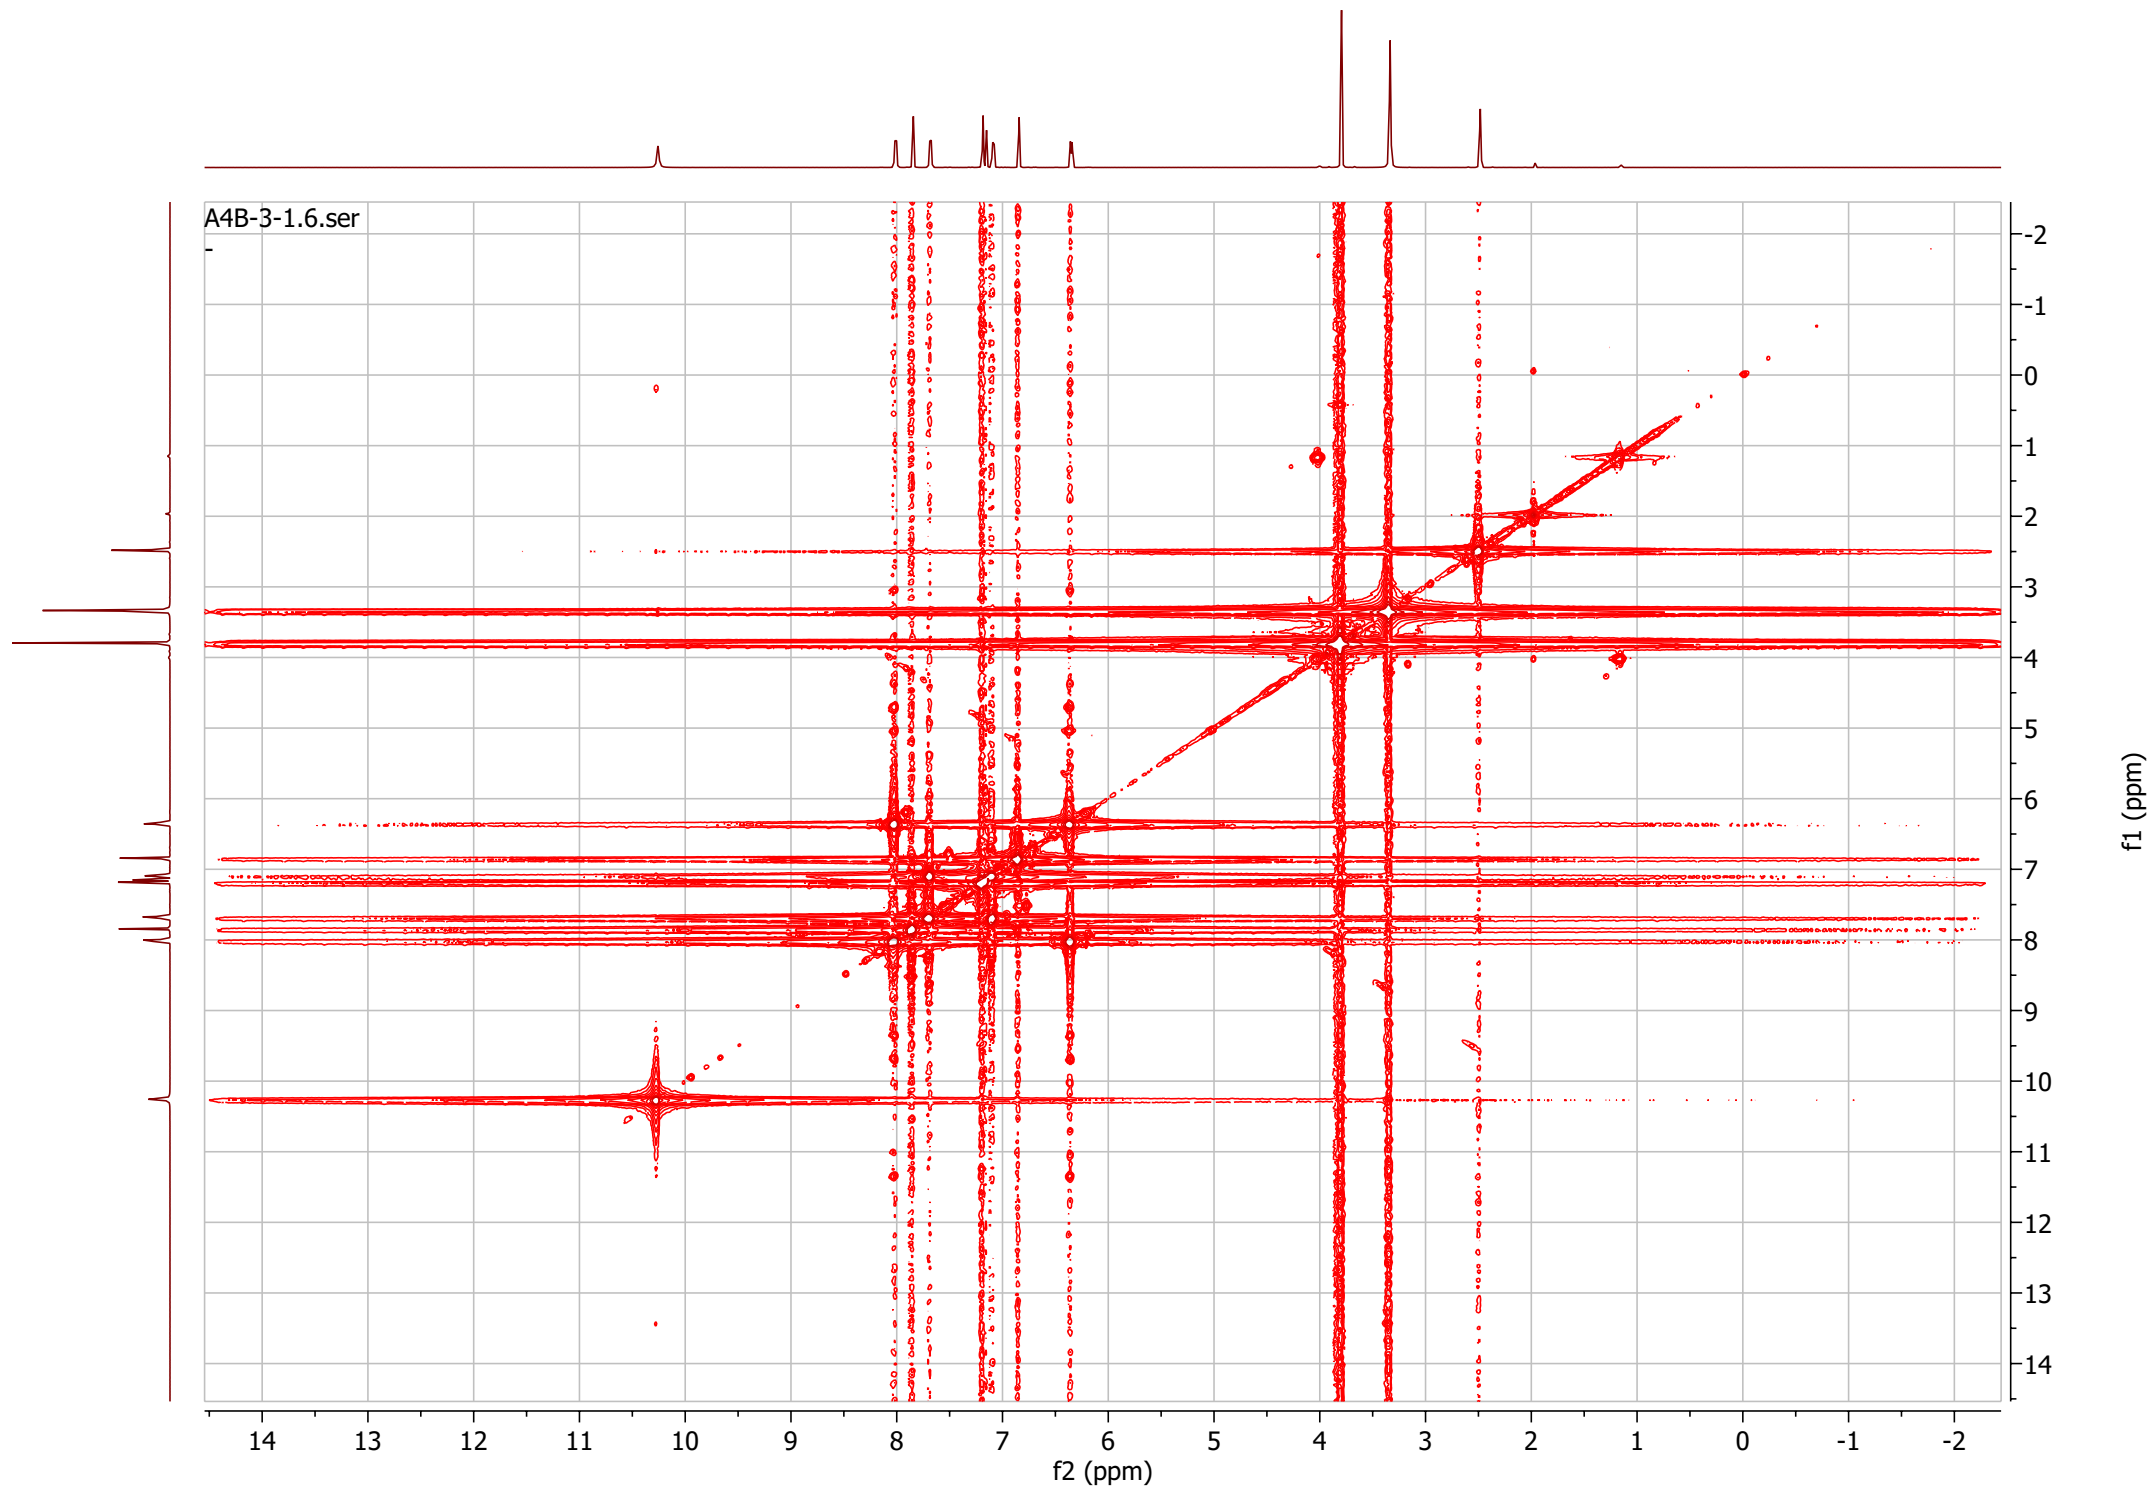



A4B-3-1.40.ser

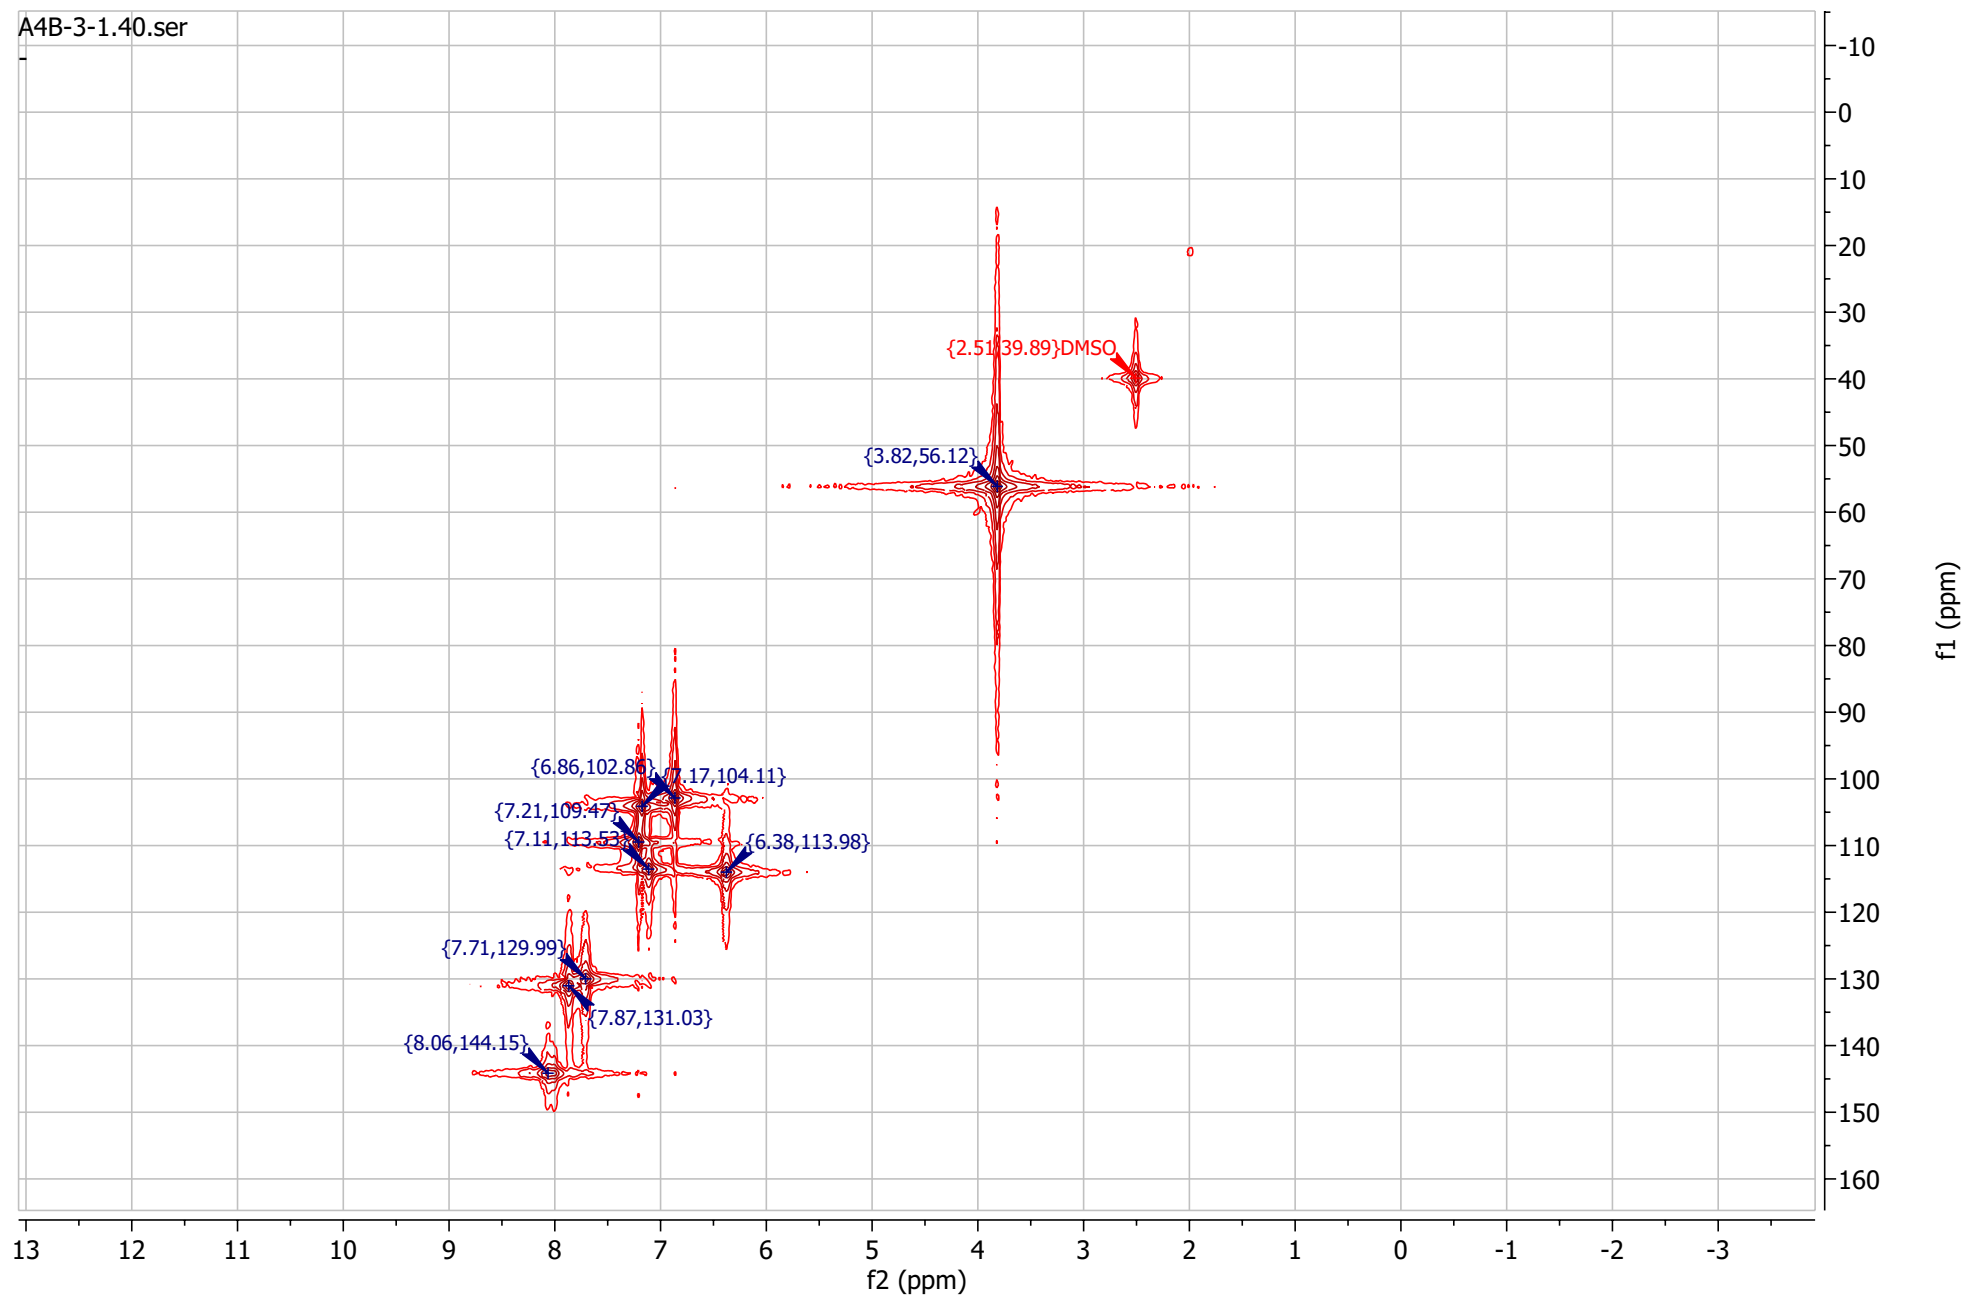

A4B-3-1.40.ser

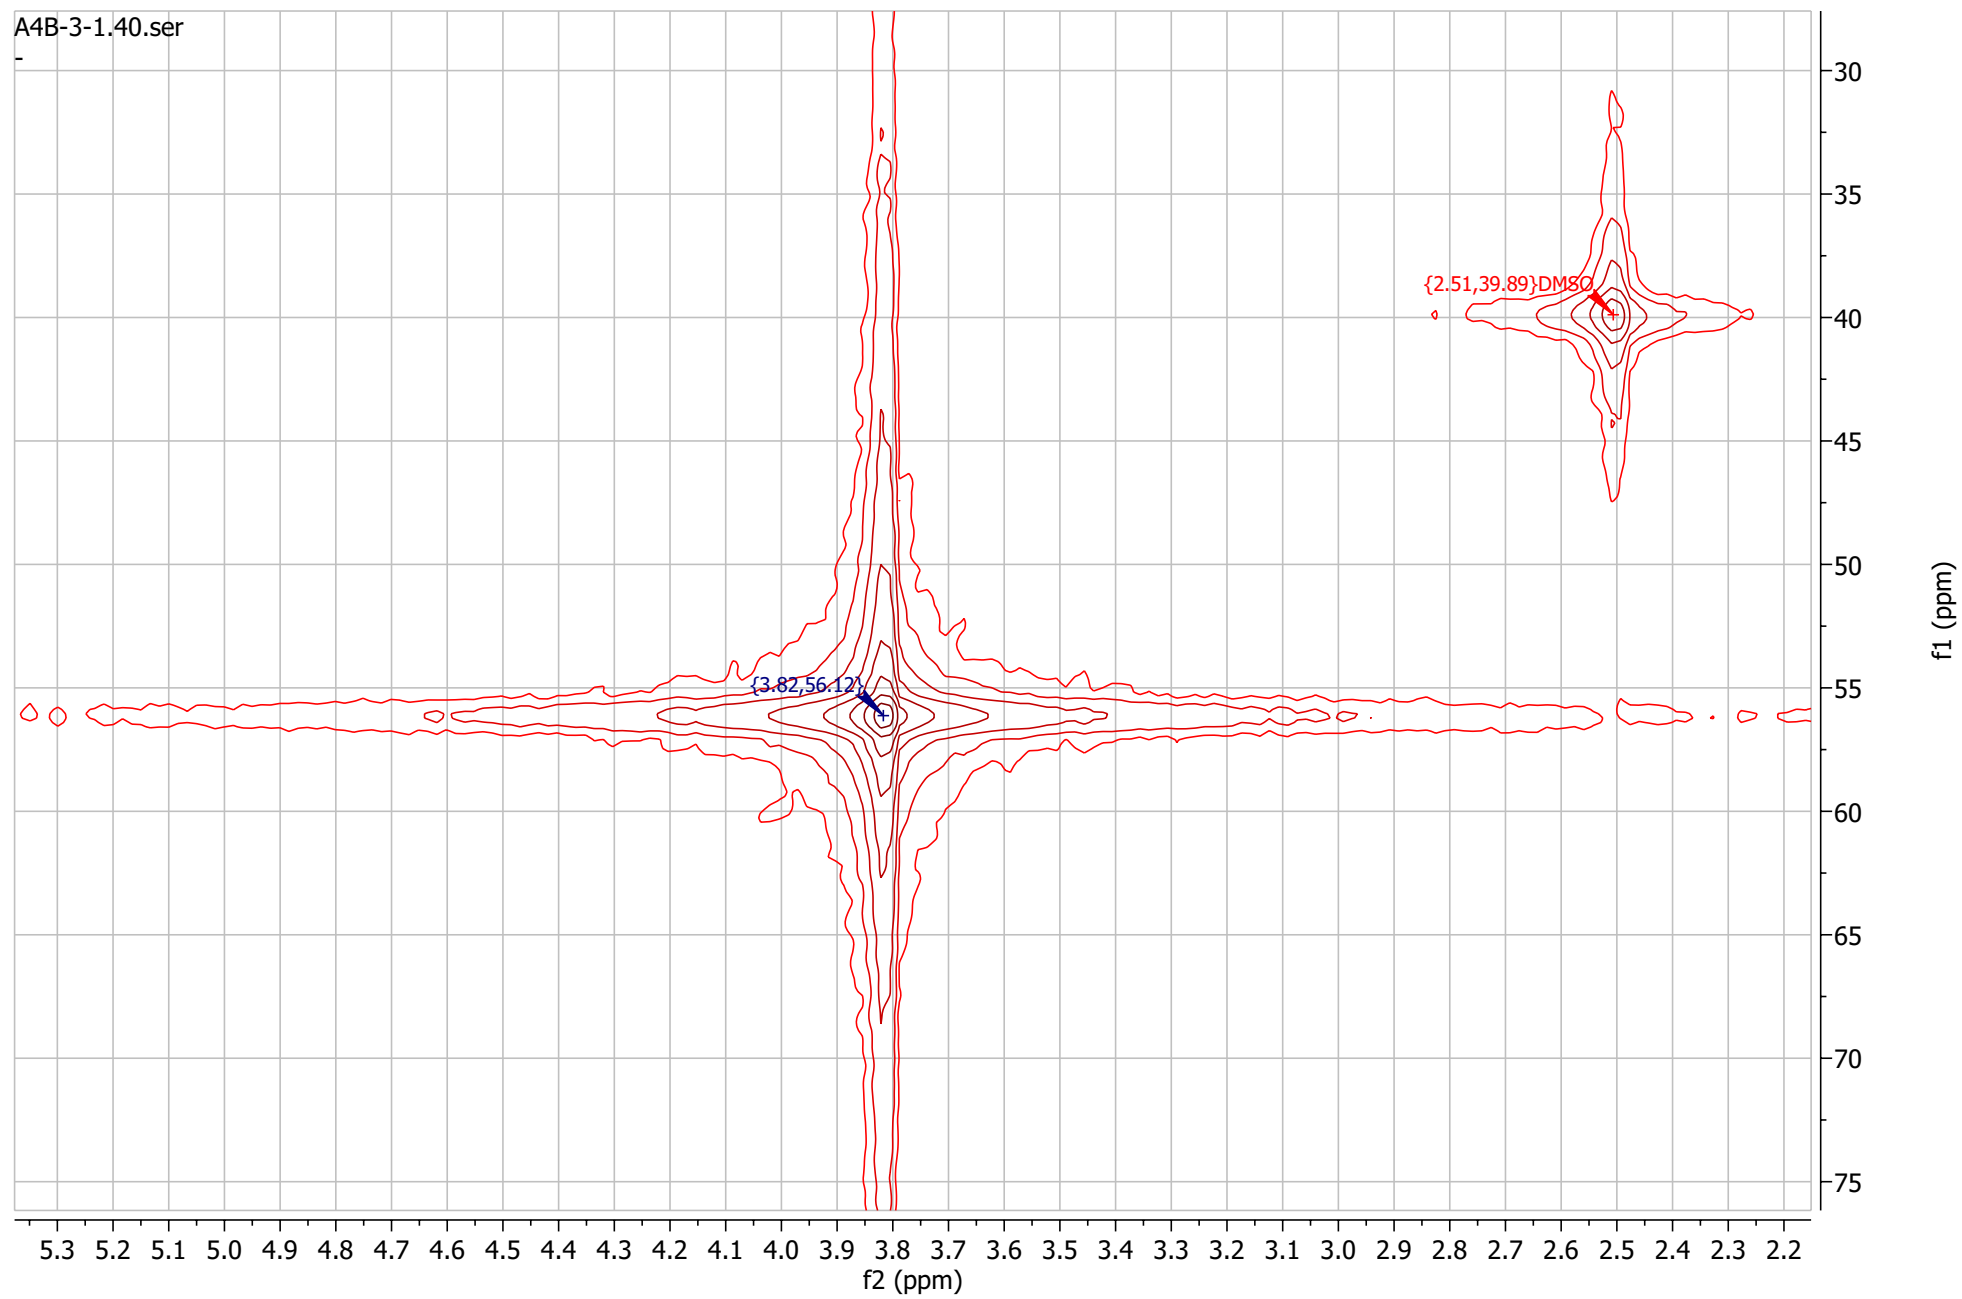

A4B-3-1.40.ser

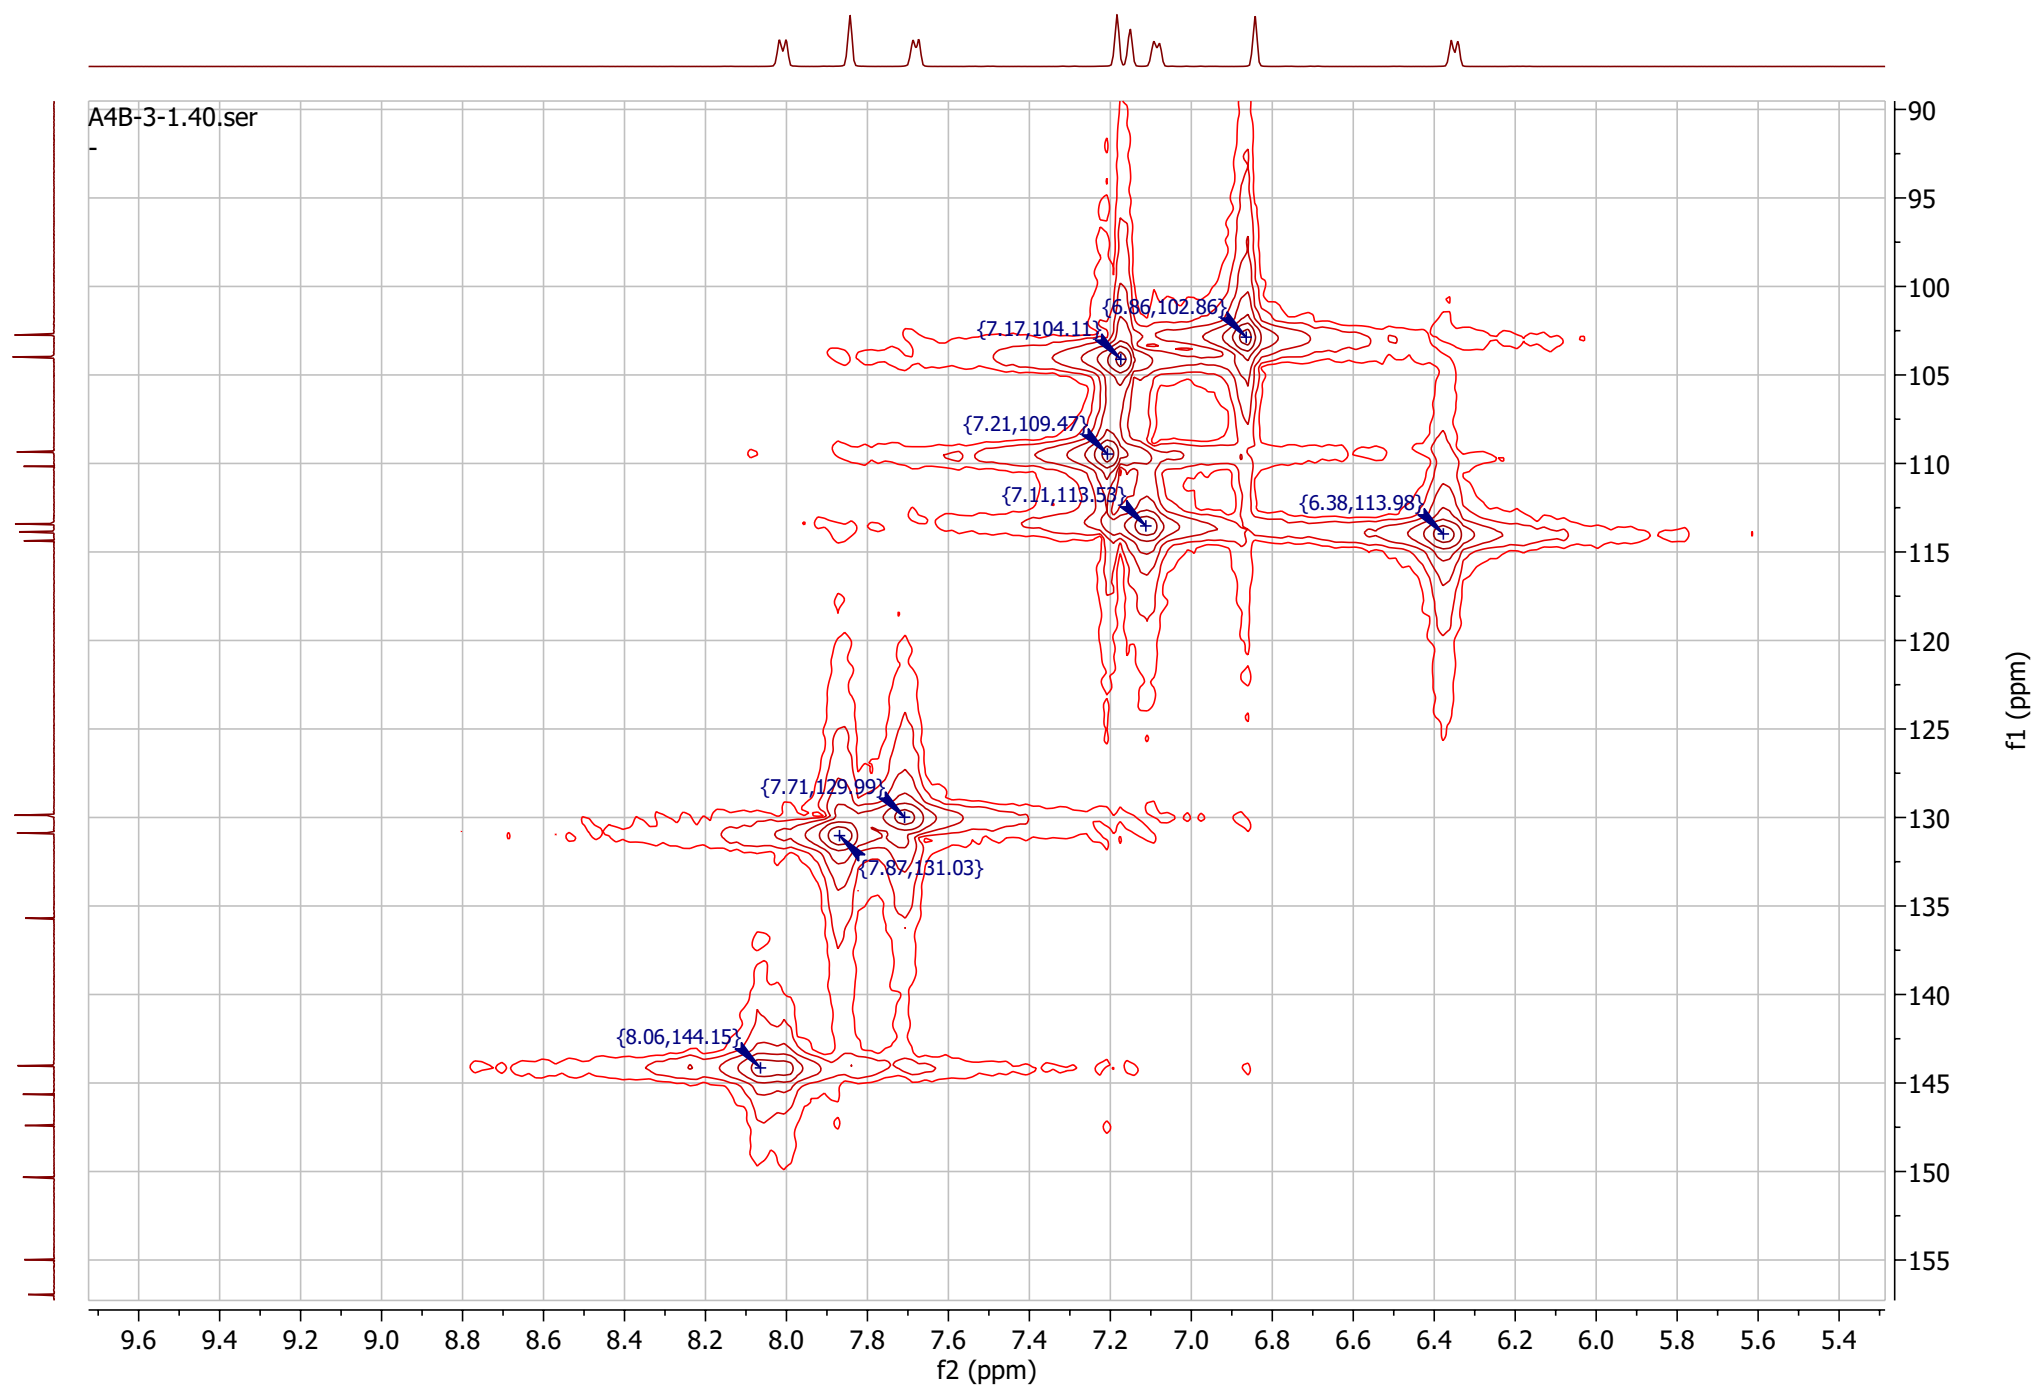

A4B-3-1.5.ser  
HMBCGP

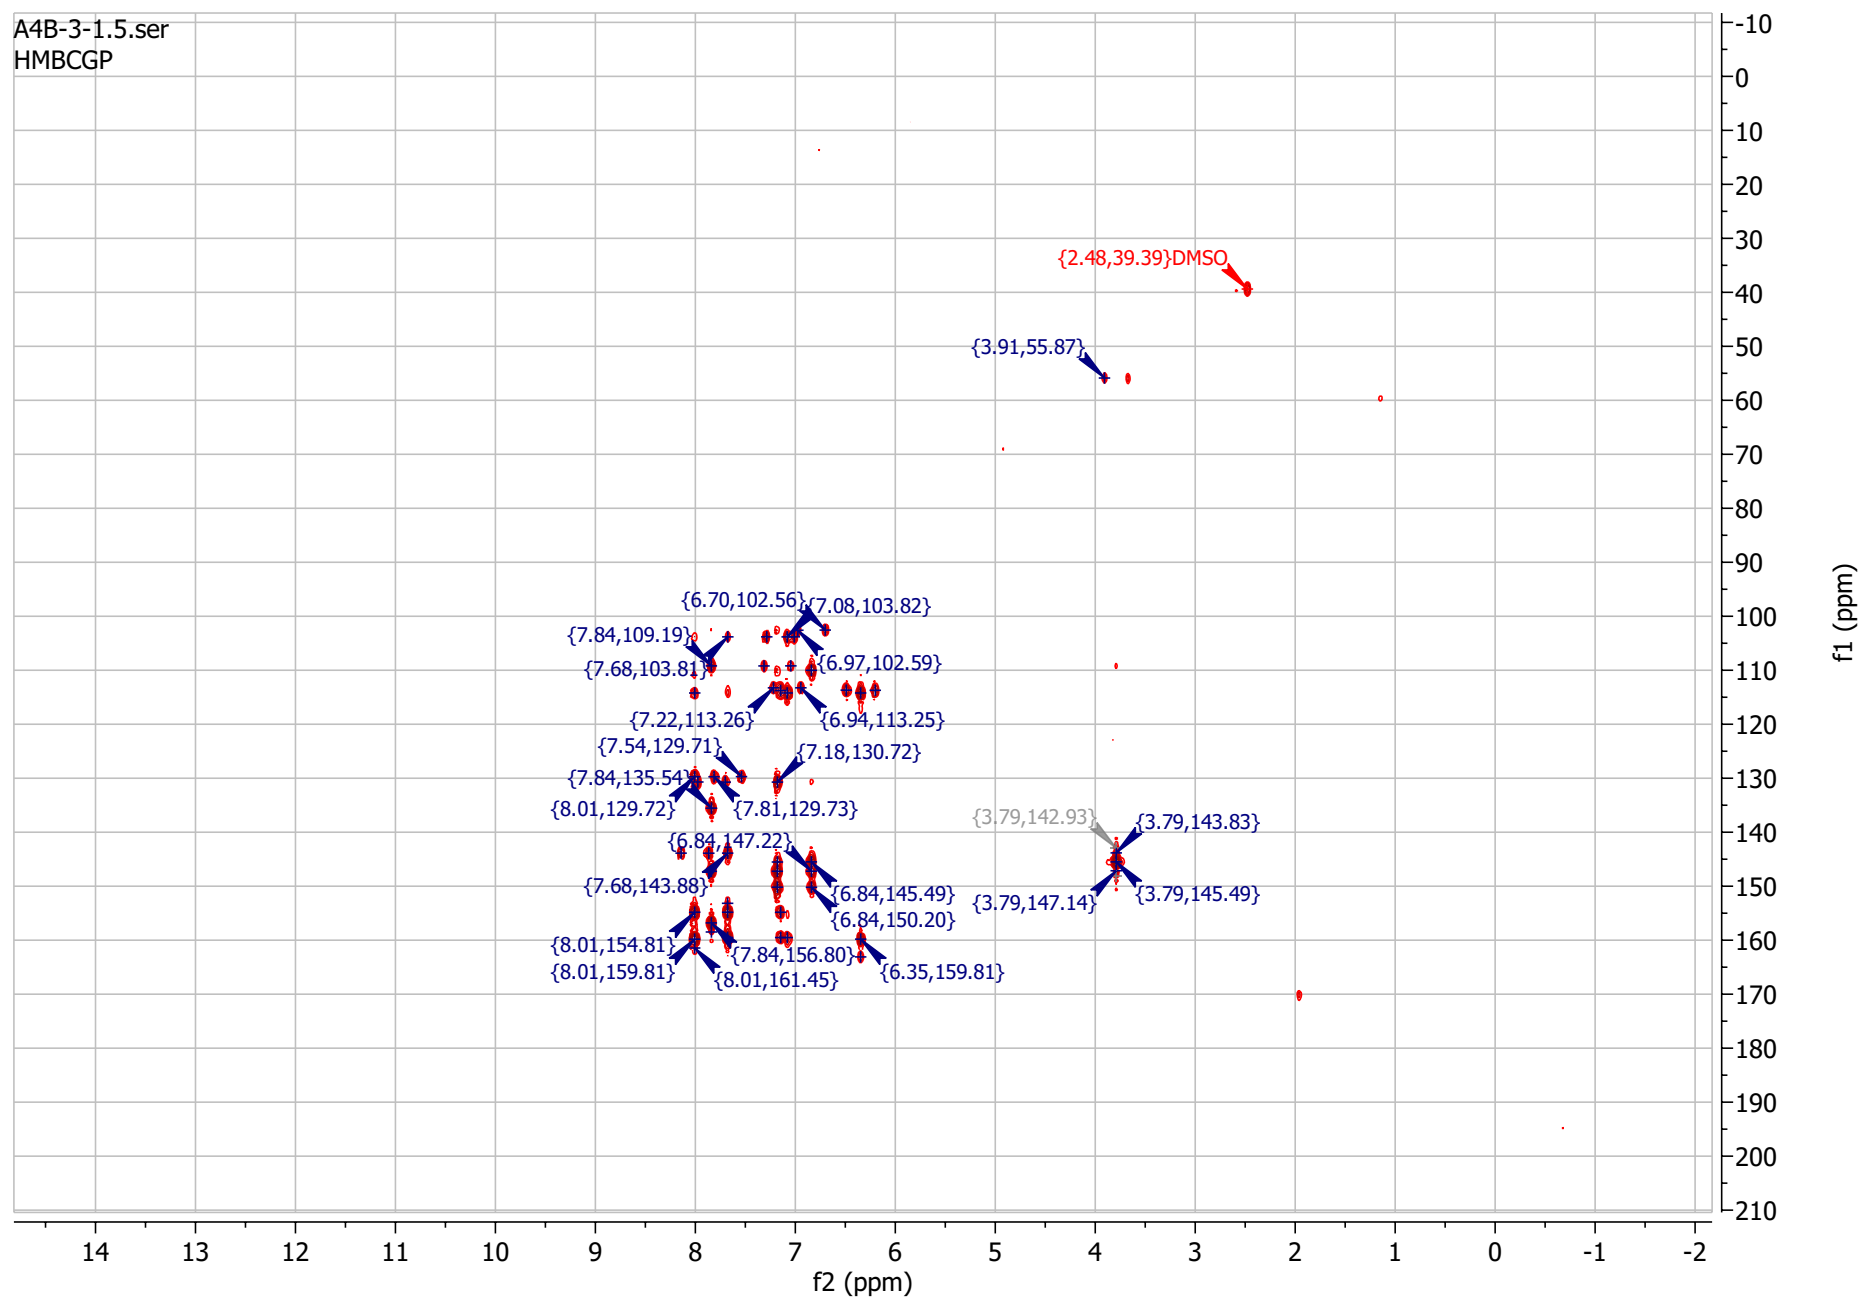

A4B-3-1.5.ser  
HMBCGP

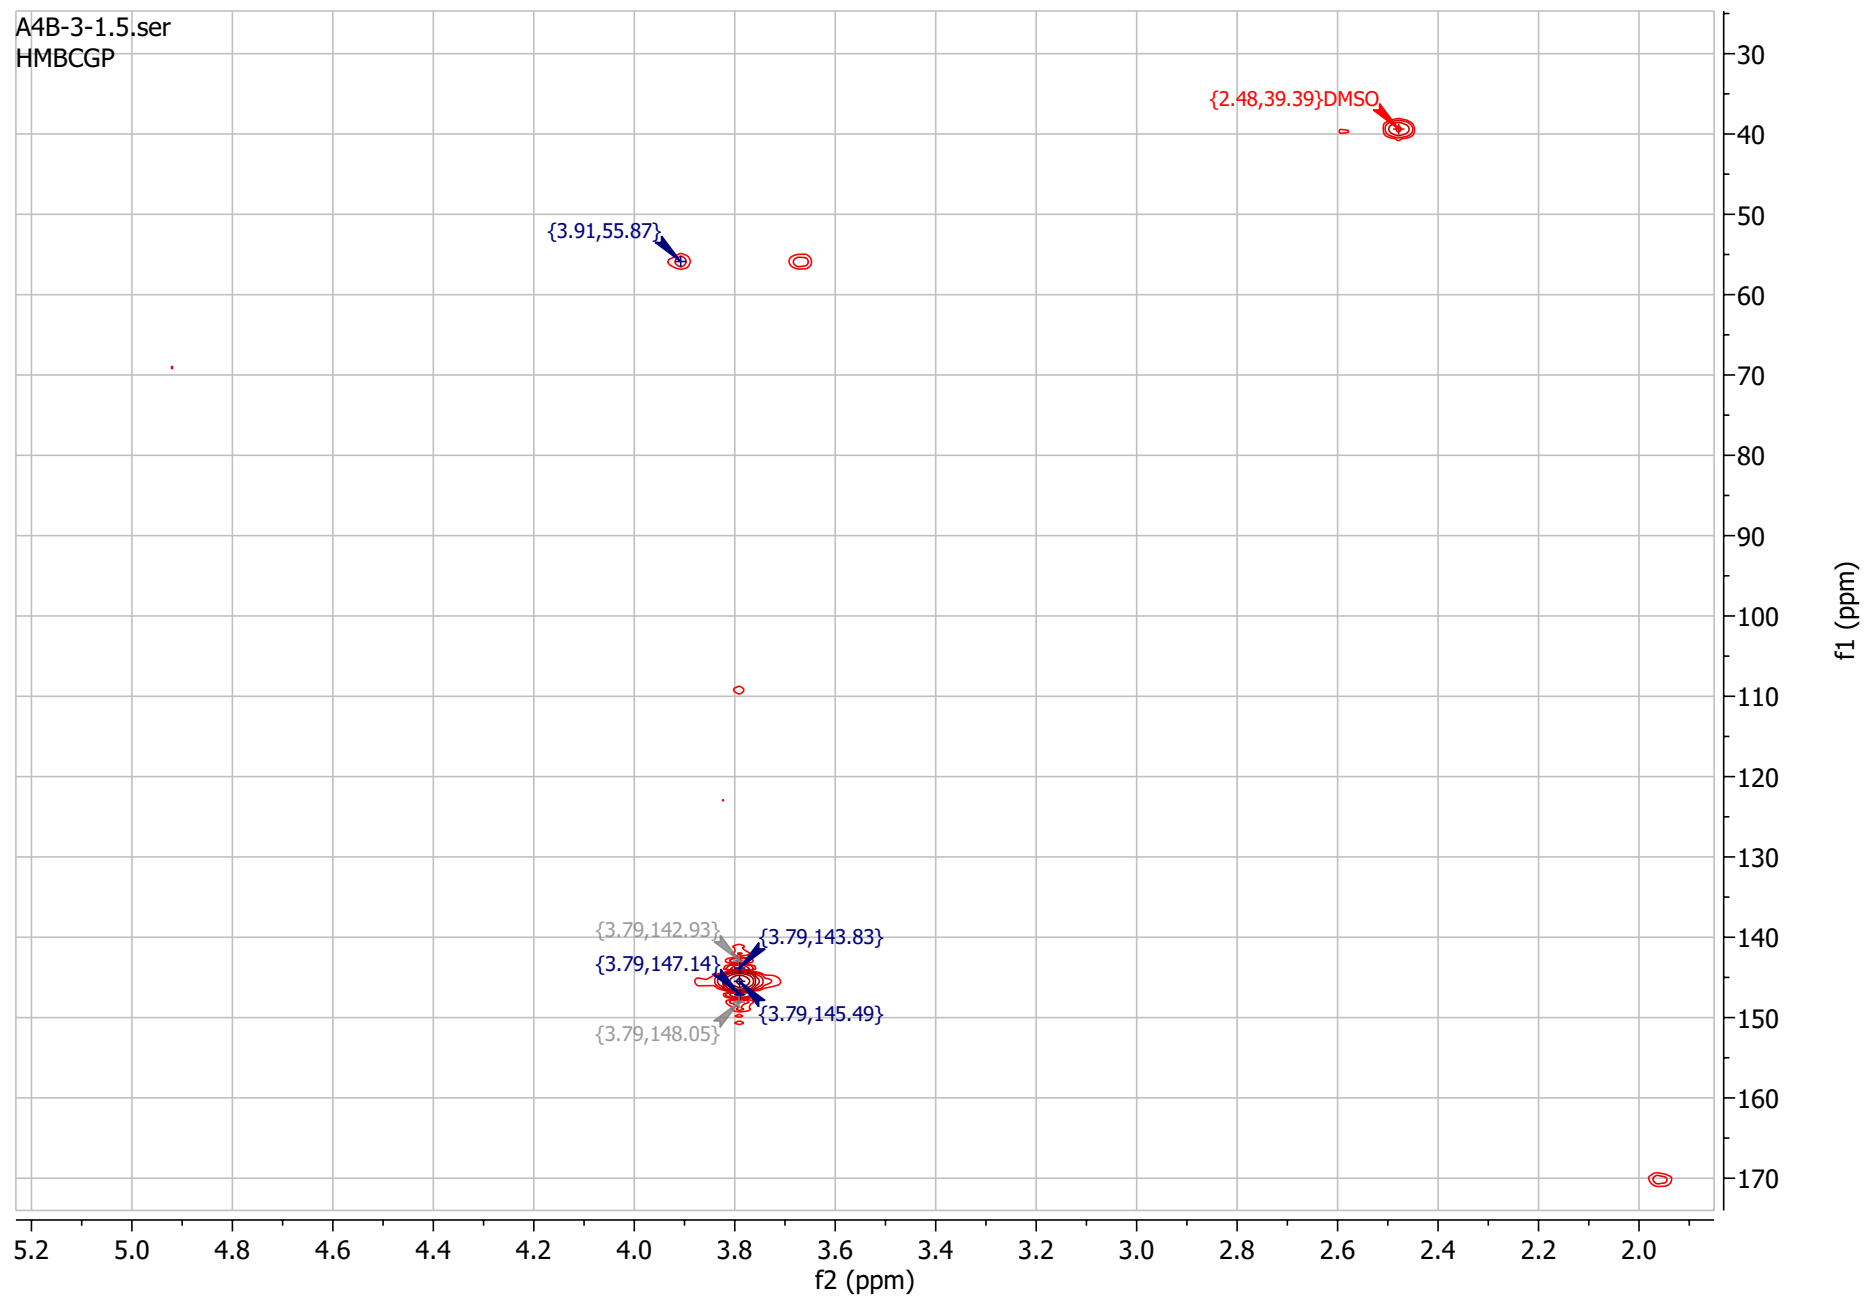

A4B-3-1.5.ser  
HMBCGP

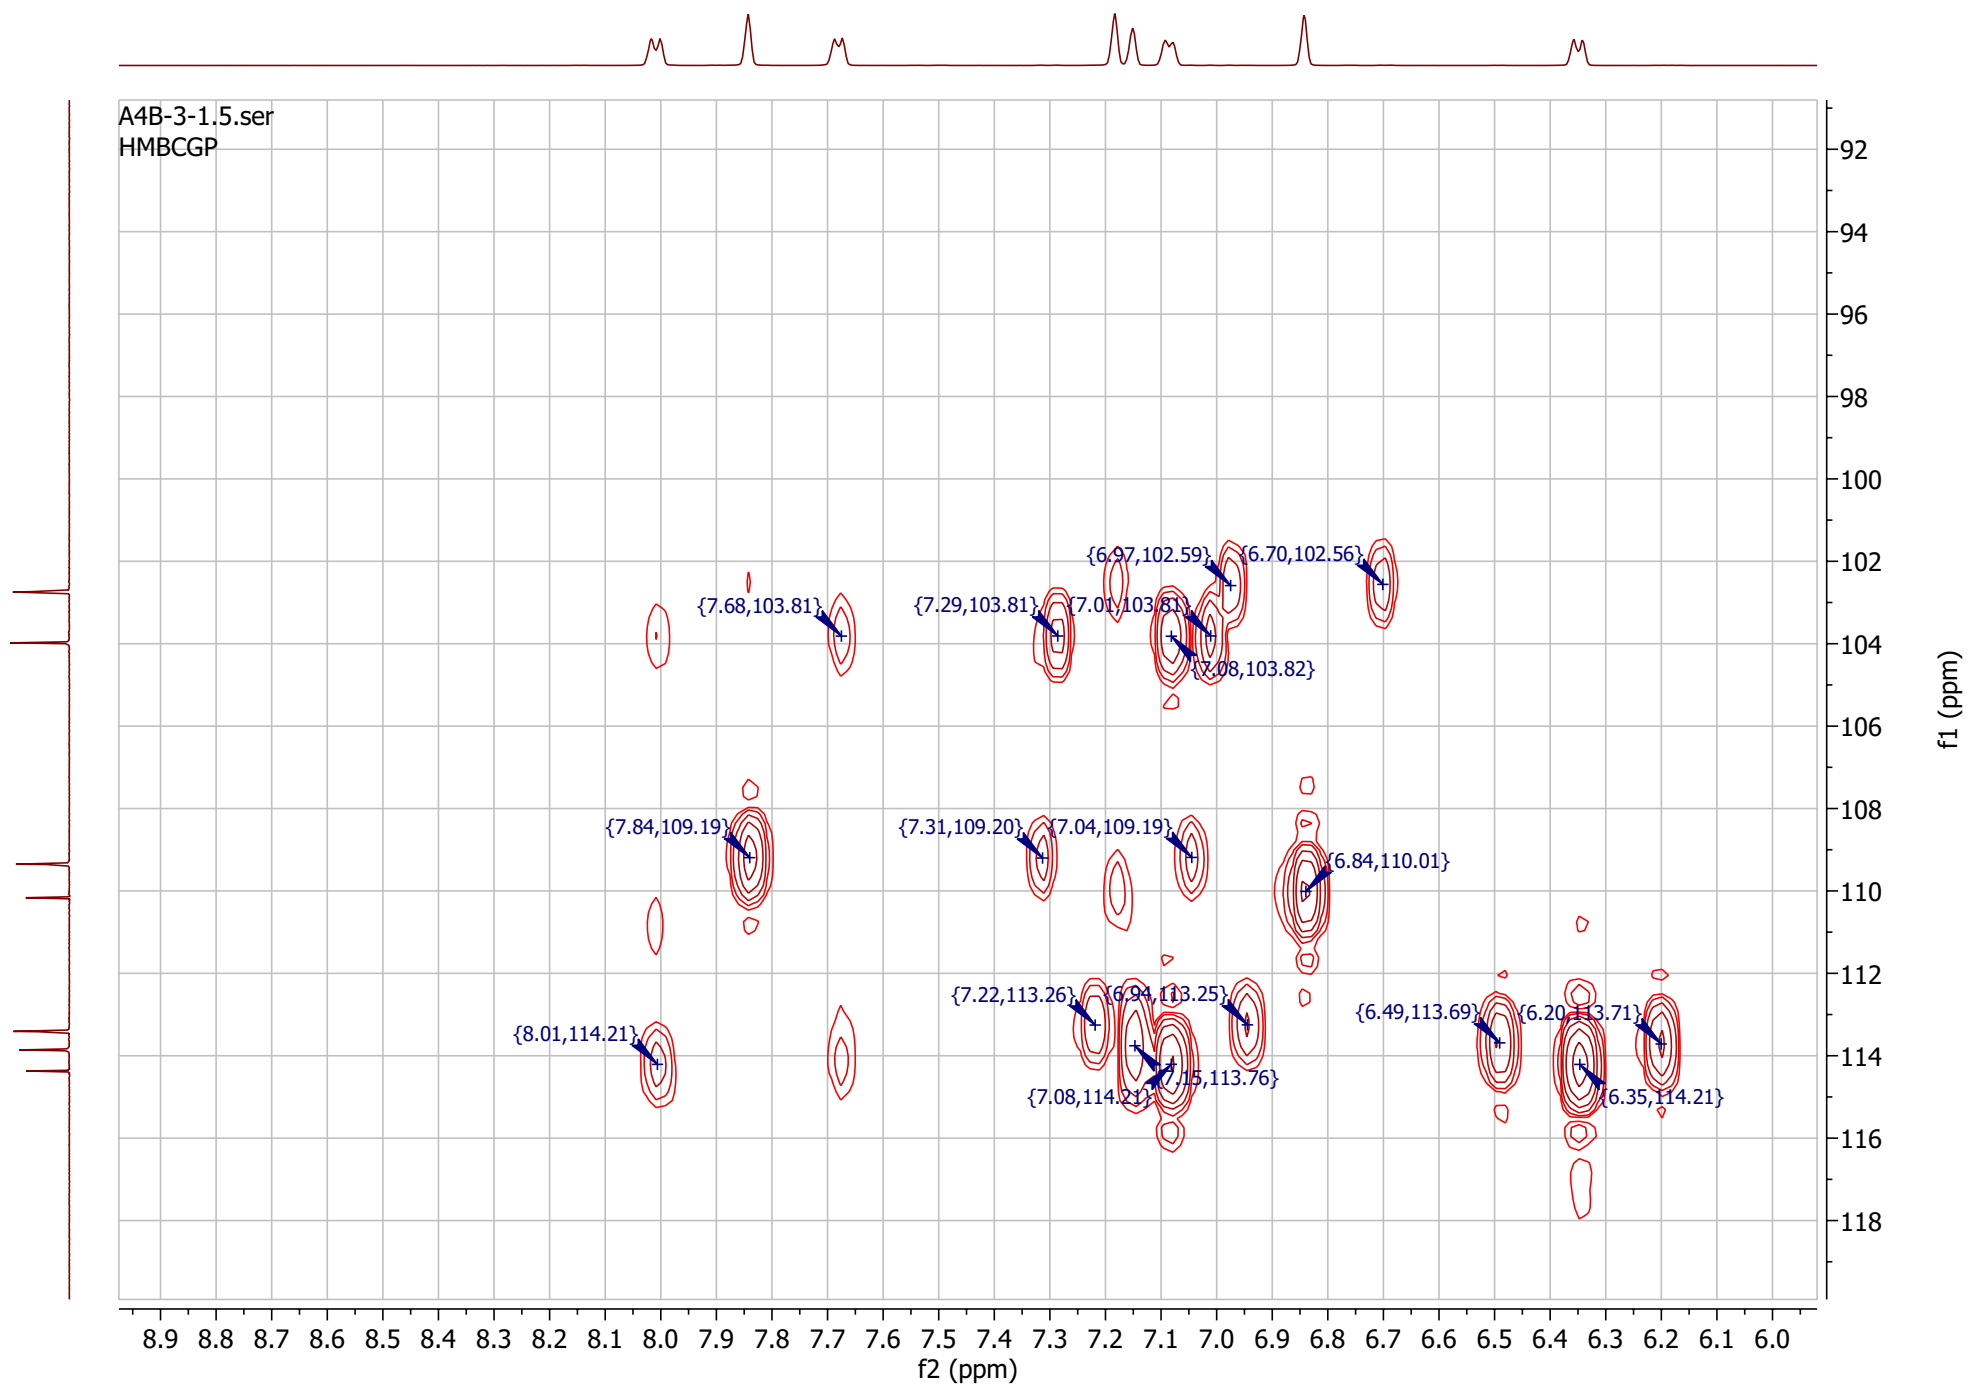

A4B-3-1.5.ser  
HMBCGP

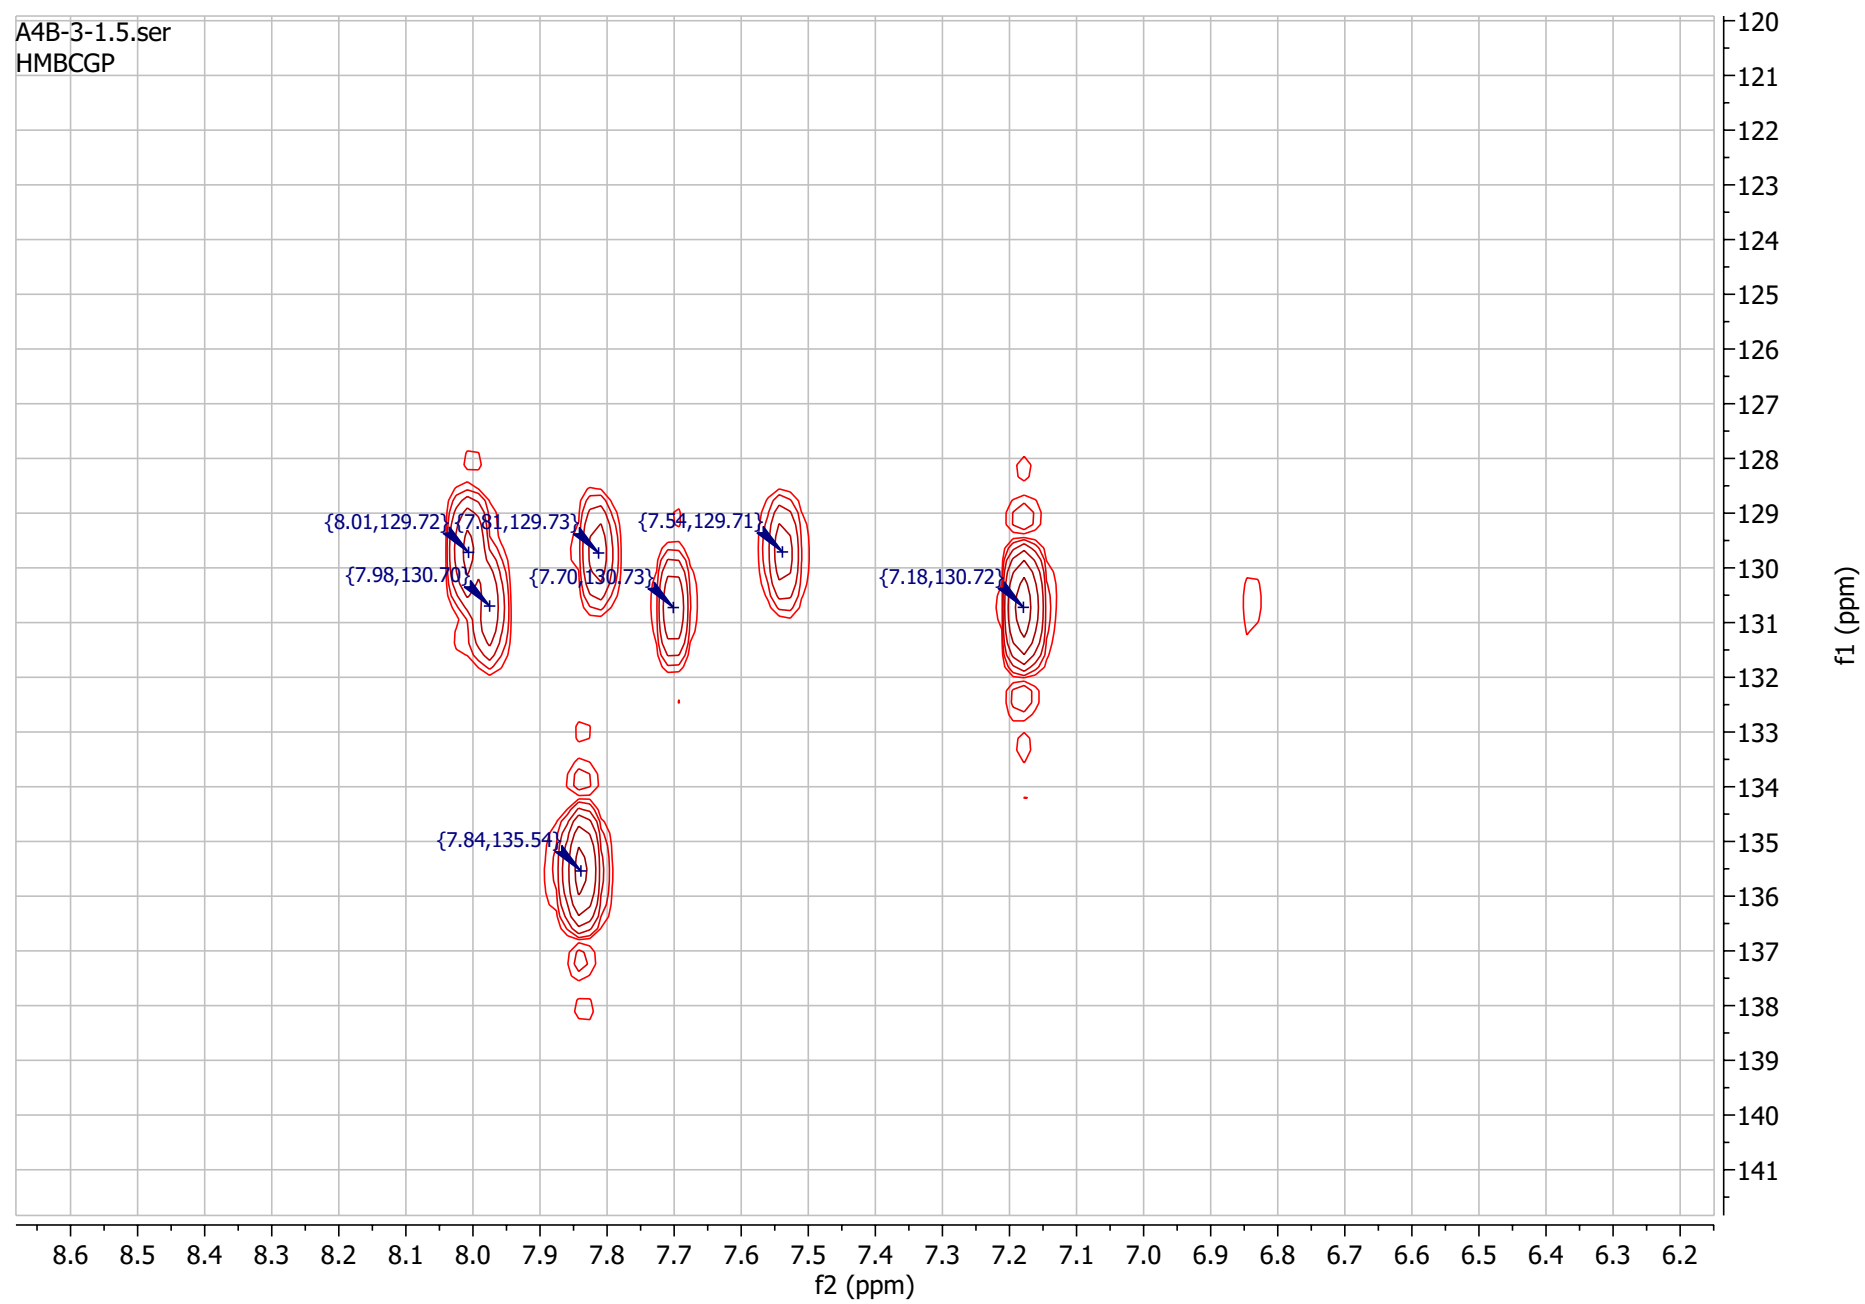

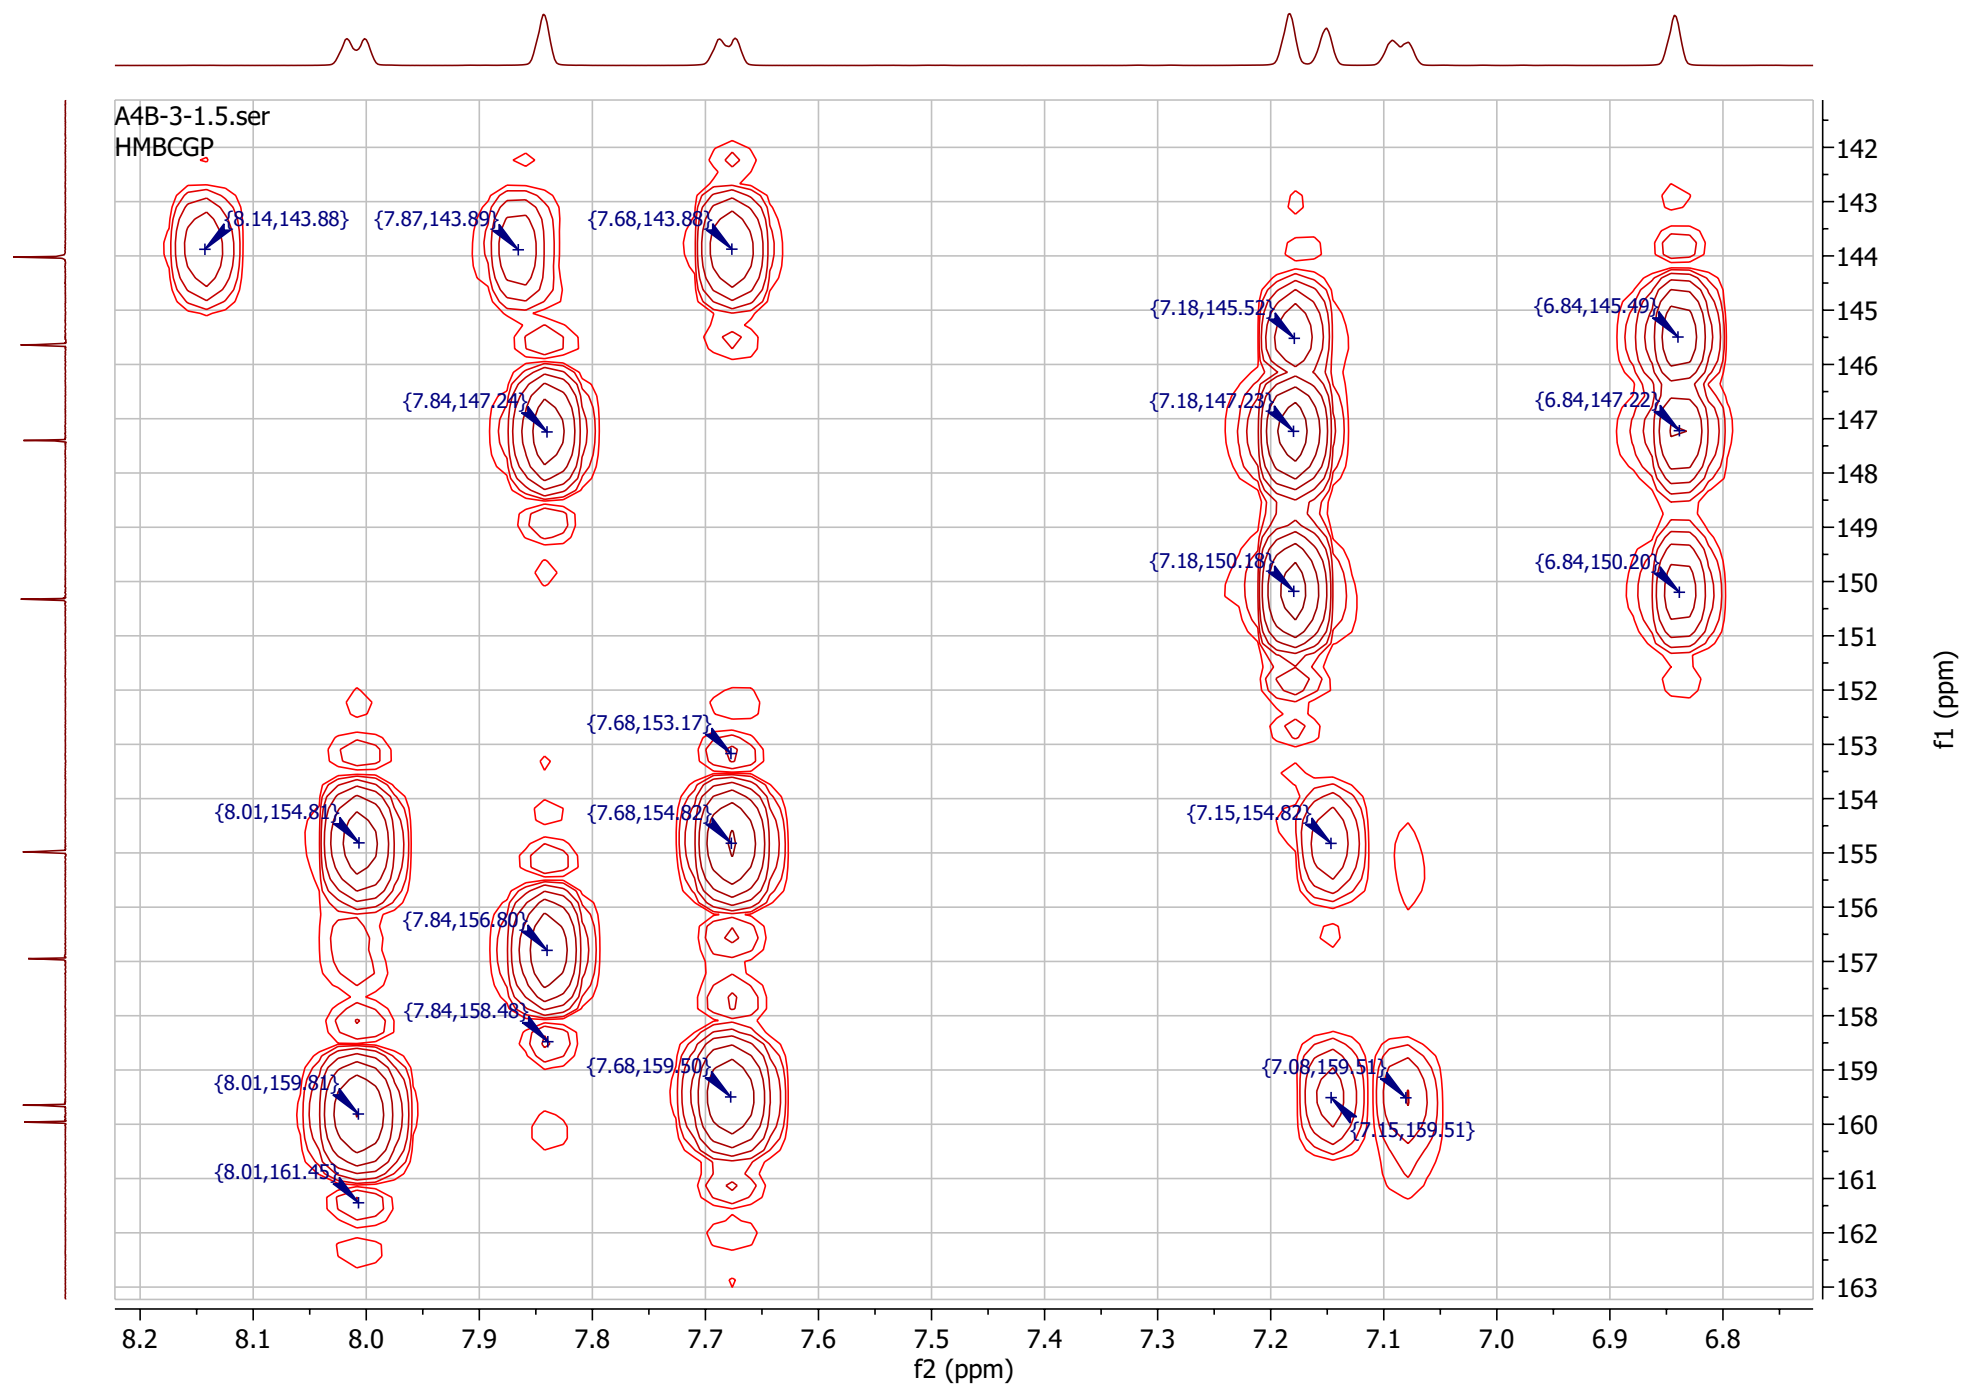



# Toxicity Report

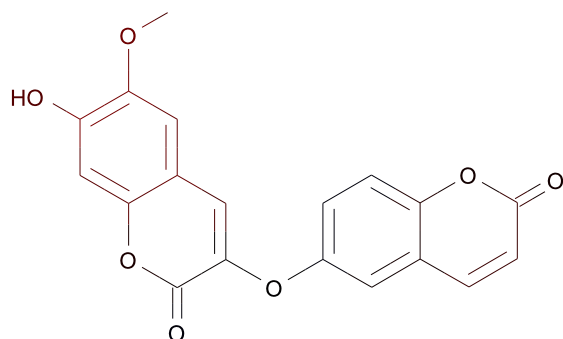C<sub>19</sub>H<sub>12</sub>O<sub>7</sub>

Molecular Weight: 352.29437

ALogP: 2.975

Rotatable Bonds: 3

Acceptors: 7

Donors: 1

## Model Prediction

Prediction: Toxic

Probability: 0.718

Enrichment: 1.37

Bayesian Score: 4.4

Mahalanobis Distance: 11.2

Mahalanobis Distance p-value: 0.000474

Prediction: Positive if the Bayesian score is above the estimated best cutoff value from minimizing the false positive and false negative rate.

Probability: The estimated probability that the sample is in the positive category. This assumes that the Bayesian score follows a normal distribution and is different from the prediction using a cutoff.

Enrichment: An estimate of enrichment, that is, the increased likelihood (versus random) of this sample being in the category.

Bayesian Score: The standard Laplacian-modified Bayesian score.

Mahalanobis Distance: The Mahalanobis distance (MD) is the distance to the center of the training data. The larger the MD, the less trustworthy the prediction.

Mahalanobis Distance p-value: The p-value gives the fraction of training data with an MD greater than or equal to the one for the given sample, assuming normally distributed data. The smaller the p-value, the less trustworthy the prediction. For highly non-normal X properties (e.g., fingerprints), the MD p-value is wildly inaccurate.

## Structural Similar Compounds

| Name               | Prazosin .HCl (Free base form) | Bunazosin .HCl (Free base form) | D&C Yellow 8                       |
|--------------------|--------------------------------|---------------------------------|------------------------------------|
| Structure          |                                |                                 |                                    |
| Actual Endpoint    | Toxic                          | Toxic                           | Non-Toxic                          |
| Predicted Endpoint | Toxic                          | Toxic                           | Non-Toxic                          |
| Distance           | 0.554                          | 0.603                           | 0.610                              |
| Reference          | Oyo Yakuri 17:57-62; 1979      | Kiso to Rinsho 17:914-924; 1983 | Food Chem Toxicol 24:819-823; 1986 |

## Model Applicability

Unknown features are fingerprint features in the query molecule, but not found or appearing too infrequently in the training set.

1. All properties and OPS components are within expected ranges.

## Feature Contribution

### Top features for positive contribution

| Fingerprint | Bit/Smiles | Feature Structure                                       | Score | Toxic in training set |
|-------------|------------|---------------------------------------------------------|-------|-----------------------|
| SCFP_6      | 2116304939 | <br><chem>[*]O[c]1:[cH]:[*]:[c]([*]):[cH]:[c]:1O</chem> | 0.504 | 5 out of 5            |

| SCFP_6                                 | -1977229858 | 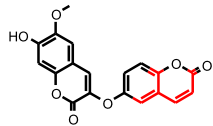<br><chem>[*]=C1[*][c](:[*]):[c]([cH]:[*])C=C1</chem>          | 0.478  | 4 out of 4            |
|----------------------------------------|-------------|---------------------------------------------------------------------------------------------------------------------------------------------------|--------|-----------------------|
| SCFP_6                                 | -1971137145 | <br><chem>[*]C(=C[c](:[*]):[*])[*]</chem>                      | 0.431  | 7 out of 8            |
| Top Features for negative contribution |             |                                                                                                                                                   |        |                       |
| Fingerprint                            | Bit/Smiles  | Feature Structure                                                                                                                                 | Score  | Toxic in training set |
| SCFP_6                                 | -609499983  | <br><chem>[*]C(=[*])O[c]1:[cH]:[cH]:[*]:[c]([*]):[cH]:1</chem> | -0.422 | 0 out of 1            |
| SCFP_6                                 | 1132907712  | <br><chem>[*]OC(=O)C(=[*])[*]</chem>                         | -0.184 | 9 out of 21           |
| SCFP_6                                 | 12          | <br><chem>[*]O[*]</chem>                                     | 0      | 97 out of 178         |

# remdesivir

# TOPKAT\_Developmental\_Toxicity\_Potential

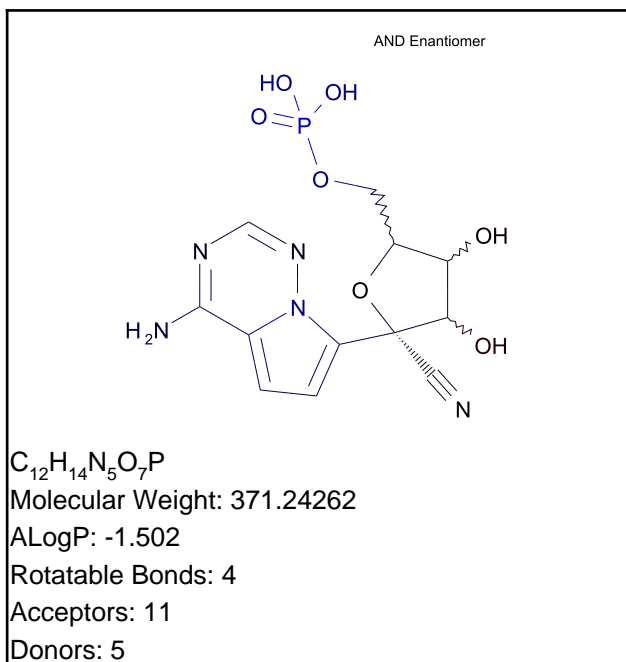

## Model Prediction

Prediction: Non-Toxic

Probability: 0.373

Enrichment: 0.709

Bayesian Score: -5.42

Mahalanobis Distance: 9.05

Mahalanobis Distance p-value: 0.163

Prediction: Positive if the Bayesian score is above the estimated best cutoff value from minimizing the false positive and false negative rate.

Probability: The estimated probability that the sample is in the positive category. This assumes that the Bayesian score follows a normal distribution and is different from the prediction using a cutoff.

Enrichment: An estimate of enrichment, that is, the increased likelihood (versus random) of this sample being in the category.

Bayesian Score: The standard Laplacian-modified Bayesian score.

Mahalanobis Distance: The Mahalanobis distance (MD) is the distance to the center of the training data. The larger the MD, the less trustworthy the prediction.

Mahalanobis Distance p-value: The p-value gives the fraction of training data with an MD greater than or equal to the one for the given sample, assuming normally distributed data. The smaller the p-value, the less trustworthy the prediction. For highly non-normal X properties (e.g., fingerprints), the MD p-value is wildly inaccurate.

## Structural Similar Compounds

| Name               | Sinigrin (Free Acid Form)                                                           | Azthreonam                                                                          | Vidarabine                                                                          |
|--------------------|-------------------------------------------------------------------------------------|-------------------------------------------------------------------------------------|-------------------------------------------------------------------------------------|
| Structure          | 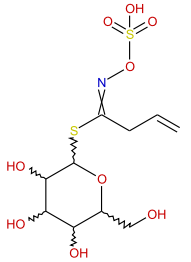 |  |  |
| Actual Endpoint    | Toxic                                                                               | Non-Toxic                                                                           | Non-Toxic                                                                           |
| Predicted Endpoint | Toxic                                                                               | Non-Toxic                                                                           | Non-Toxic                                                                           |
| Distance           | 0.632                                                                               | 0.707                                                                               | 0.714                                                                               |
| Reference          | Food Cosmet Toxicol 18(2):159-72; 1980                                              | Chemotherapy 33:203-218; 1985                                                       | Teratology 15(3):231-41; 1977                                                       |

## Model Applicability

Unknown features are fingerprint features in the query molecule, but not found or appearing too infrequently in the training set.

1. All properties and OPS components are within expected ranges.

## Feature Contribution

### Top features for positive contribution

| Fingerprint | Bit/Smiles  | Feature Structure                                                                                                                            | Score | Toxic in training set |
|-------------|-------------|----------------------------------------------------------------------------------------------------------------------------------------------|-------|-----------------------|
| SCFP_6      | -1486266146 | <p>AND Enantiomer</p> 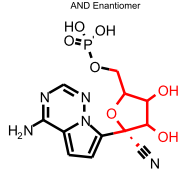 <p>[*]CC1OC([*])([*])C(O)C1O</p> | 0.431 | 7 out of 8            |

|                                        |             |                                                                                                                                                                 |        |                       |
|----------------------------------------|-------------|-----------------------------------------------------------------------------------------------------------------------------------------------------------------|--------|-----------------------|
| SCFP_6                                 | -1715619483 | <p>AND Enantiomer</p> 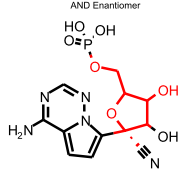 <p>[*]OCC1OC([*])([*])C([*])C1O</p>                   | 0.298  | 6 out of 8            |
| SCFP_6                                 | -1181430618 | <p>AND Enantiomer</p>  <p>[*]:n:[cH]:n:[*]</p>                               | 0.298  | 6 out of 8            |
| Top Features for negative contribution |             |                                                                                                                                                                 |        |                       |
| Fingerprint                            | Bit/Smiles  | Feature Structure                                                                                                                                               | Score  | Toxic in training set |
| SCFP_6                                 | 2108966103  | <p>AND Enantiomer</p>  <p>[*]C([*])COP(=O)(O)O</p>                           | -0.945 | 0 out of 3            |
| SCFP_6                                 | -1375522316 | <p>AND Enantiomer</p>  <p>[*]C([*])([*])[c]1:[cH]:[cH]:[c]([*]):n:1:[*]</p> | -0.945 | 0 out of 3            |
| SCFP_6                                 | 269938867   | <p>AND Enantiomer</p>  <p>[*]OP(=O)(O)O</p>                                | -0.729 | 1 out of 6            |

## new dicoumarin.cdx

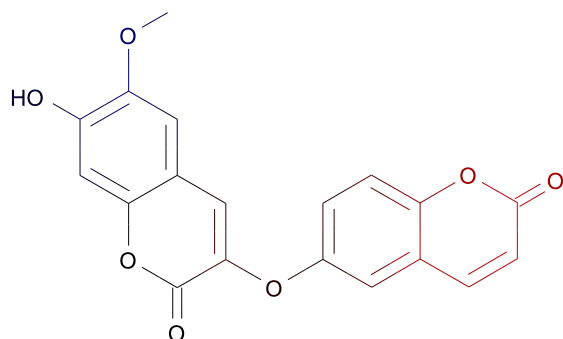

C<sub>19</sub>H<sub>12</sub>O<sub>7</sub>

Molecular Weight: 352.29437

ALogP: 2.975

Rotatable Bonds: 3

Acceptors: 7

Donors: 1

### Model Prediction

Prediction: Carcinogen

Probability: 0.312

Enrichment: 0.974

Bayesian Score: 2

Mahalanobis Distance: 11.9

Mahalanobis Distance p-value: 0.0124

Prediction: Positive if the Bayesian score is above the estimated best cutoff value from minimizing the false positive and false negative rate.

Probability: The estimated probability that the sample is in the positive category. This assumes that the Bayesian score follows a normal distribution and is different from the prediction using a cutoff.

Enrichment: An estimate of enrichment, that is, the increased likelihood (versus random) of this sample being in the category.

Bayesian Score: The standard Laplacian-modified Bayesian score.

Mahalanobis Distance: The Mahalanobis distance (MD) is the distance to the center of the training data. The larger the MD, the less trustworthy the prediction.

## TOPKAT\_Mouse\_Female\_FDA\_None\_vs\_Carcinogen

### Structural Similar Compounds

| Name               | Podofilox                                                           | Griseofulvin                                                        | Terazosin                                                           |
|--------------------|---------------------------------------------------------------------|---------------------------------------------------------------------|---------------------------------------------------------------------|
| Structure          |                                                                     |                                                                     |                                                                     |
| Actual Endpoint    | Non-Carcinogen                                                      | Carcinogen                                                          | Non-Carcinogen                                                      |
| Predicted Endpoint | Non-Carcinogen                                                      | Carcinogen                                                          | Non-Carcinogen                                                      |
| Distance           | 0.621                                                               | 0.640                                                               | 0.650                                                               |
| Reference          | US FDA (Centre for Drug Eval.& Res./Off. Testing & Res.) Sept. 1997 | US FDA (Centre for Drug Eval.& Res./Off. Testing & Res.) Sept. 1997 | US FDA (Centre for Drug Eval.& Res./Off. Testing & Res.) Sept. 1997 |

### Model Applicability

Unknown features are fingerprint features in the query molecule, but not found or appearing too infrequently in the training set.

1. All properties and OPS components are within expected ranges.
2. Unknown ECFP\_2 feature: -741588105: [\*]O\C(=C[\*])\C(=[\*])[\*]

### Feature Contribution

#### Top features for positive contribution

| Fingerprint | Bit/Smiles | Feature Structure            | Score | Carcinogen in training set |
|-------------|------------|------------------------------|-------|----------------------------|
| ECFP_6      | 1745066357 | <br>[*]\C=C/[c]([*]):[*]:[*] | 0.529 | 7 out of 12                |

| ECFP_6                                 | 464808839  | 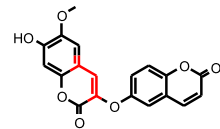<br><chem>[*]C(=C[c](:[*]):[*])</chem><br><chem>[*]</chem>       | 0.524  | 8 out of 14                |
|----------------------------------------|------------|-----------------------------------------------------------------------------------------------------------------------------------------------------|--------|----------------------------|
| ECFP_6                                 | 1003935500 | <br><chem>[*]:[cH]:[c]1C=CC(=O)</chem><br><chem>O[c]:1[*]</chem> | 0.424  | 1 out of 1                 |
| Top Features for negative contribution |            |                                                                                                                                                     |        |                            |
| Fingerprint                            | Bit/Smiles | Feature Structure                                                                                                                                   | Score  | Carcinogen in training set |
| ECFP_6                                 | 1307307440 | <br><chem>[*]:[c](:[*])OC</chem>                                 | -0.558 | 4 out of 25                |
| ECFP_6                                 | 1334400011 | <br><chem>[*][c](:[*]):[c](O):[cH]:[*]</chem>                   | -0.496 | 3 out of 18                |
| ECFP_6                                 | 864909220  | <br><chem>[*]OC</chem>                                         | -0.466 | 7 out of 38                |

# remdesivir

# TOPKAT\_Mouse\_Female\_FDA\_None\_vs\_Carcinogen

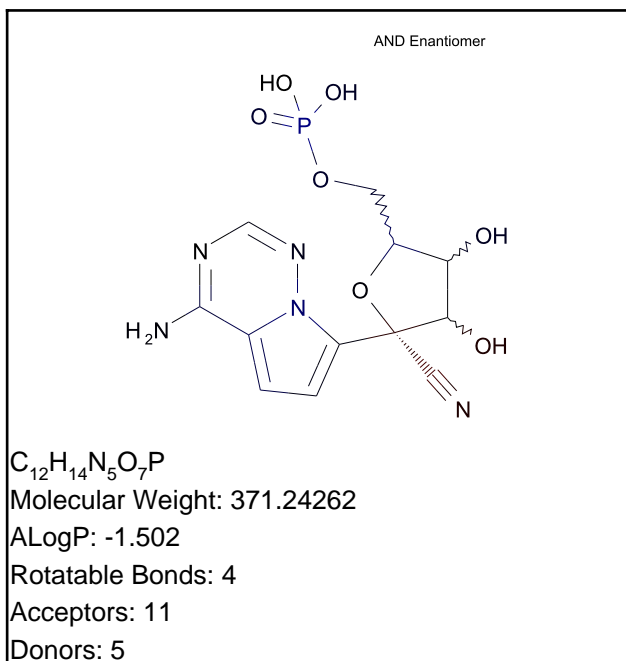

## Model Prediction

Prediction: Non-Carcinogen

Probability: 0.206

Enrichment: 0.642

Bayesian Score: -7.17

Mahalanobis Distance: 12.9

Mahalanobis Distance p-value: 0.00074

Prediction: Positive if the Bayesian score is above the estimated best cutoff value from minimizing the false positive and false negative rate.

Probability: The estimated probability that the sample is in the positive category. This assumes that the Bayesian score follows a normal distribution and is different from the prediction using a cutoff.

Enrichment: An estimate of enrichment, that is, the increased likelihood (versus random) of this sample being in the category. Bayesian Score: The standard Laplacian-modified Bayesian score.

Mahalanobis Distance: The Mahalanobis distance (MD) is the distance to the center of the training data. The larger the MD, the less trustworthy the prediction.

Mahalanobis Distance p-value: The p-value gives the fraction of training data with an MD greater than or equal to the one for the given sample, assuming normally distributed data. The smaller the p-value, the less trustworthy the prediction. For highly non-normal X properties (e.g., fingerprints), the MD p-value is wildly inaccurate.

## Structural Similar Compounds

| Name               | Famotidine                                                                          | Tetracycline                                                                        | Oxytetracycline                                                                     |
|--------------------|-------------------------------------------------------------------------------------|-------------------------------------------------------------------------------------|-------------------------------------------------------------------------------------|
| Structure          | 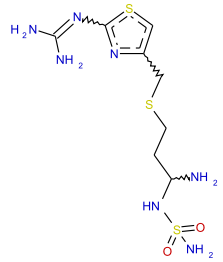 |  |  |
| Actual Endpoint    | Non-Carcinogen                                                                      | Non-Carcinogen                                                                      | Non-Carcinogen                                                                      |
| Predicted Endpoint | Non-Carcinogen                                                                      | Non-Carcinogen                                                                      | Non-Carcinogen                                                                      |
| Distance           | 0.846                                                                               | 0.848                                                                               | 0.870                                                                               |
| Reference          | US FDA (Centre for Drug Eval.& Res./Off. Testing & Res.) Sept. 1997                 | US FDA (Centre for Drug Eval.& Res./Off. Testing & Res.) Sept. 1997                 | US FDA (Centre for Drug Eval.& Res./Off. Testing & Res.) Sept. 1997                 |

## Model Applicability

Unknown features are fingerprint features in the query molecule, but not found or appearing too infrequently in the training set.

1. All properties and OPS components are within expected ranges.
2. Unknown ECFP\_2 feature: 1126642748: [\*]OP(=O)(O)O
3. Unknown ECFP\_2 feature: -1250439909: [\*]COP(=[\*])([\*])[\*]
4. Unknown ECFP\_2 feature: 1258791451: [\*]C1[\*][\*]O[C@]1(C#[\*])[c](:[\*]):[\*]
5. Unknown ECFP\_2 feature: -1507082173: [\*][c]1:[\*]:[\*]:[c](:[\*]):n:1:n:[\*]
6. Unknown ECFP\_2 feature: -66263742: [\*]C([\*])([\*])[c]1:[cH]:[\*]:[\*]:n:1:[\*]

## Feature Contribution

### Top features for positive contribution

| Fingerprint | Bit/Smiles | Feature Structure | Score | Carcinogen in training set |
|-------------|------------|-------------------|-------|----------------------------|
|             |            |                   |       |                            |



|                                        |             |                                                                                                                                                              |        |                            |
|----------------------------------------|-------------|--------------------------------------------------------------------------------------------------------------------------------------------------------------|--------|----------------------------|
| ECFP_6                                 | -1114776580 | <p>AND Enantiomer</p> 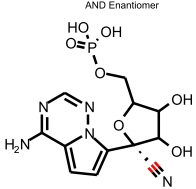 <p>[*]C#[*]</p>                                    | 0.755  | 11 out of 15               |
| ECFP_6                                 | -521596699  | <p>AND Enantiomer</p>  <p>[*]C1[*][*]C([*])([*])C1O</p>                   | 0.451  | 3 out of 5                 |
| ECFP_6                                 | -264833661  | <p>AND Enantiomer</p>  <p>[*]C([*])([*])C#N</p>                           | 0.424  | 1 out of 1                 |
| Top Features for negative contribution |             |                                                                                                                                                              |        |                            |
| Fingerprint                            | Bit/Smiles  | Feature Structure                                                                                                                                            | Score  | Carcinogen in training set |
| ECFP_6                                 | 1334415134  | <p>AND Enantiomer</p>  <p>[*][c](:[*]):[c]1:[cH]:[*]:[*]:[*]:n:1:[*]</p> | -0.935 | 0 out of 5                 |
| ECFP_6                                 | 2100964382  | <p>AND Enantiomer</p>  <p>[*]P(=O)([*])[*]</p>                          | -0.935 | 0 out of 5                 |

|        |            |                                                                                                                                        |        |            |
|--------|------------|----------------------------------------------------------------------------------------------------------------------------------------|--------|------------|
| ECFP_6 | -826638028 | <p>AND Enantiomer</p> 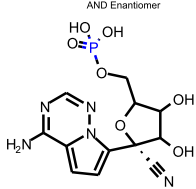 <p>[*]P(=O)([*])([*])[*]</p> | -0.935 | 0 out of 5 |
|--------|------------|----------------------------------------------------------------------------------------------------------------------------------------|--------|------------|

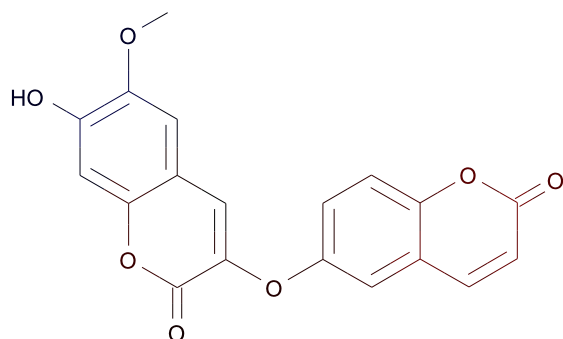C<sub>19</sub>H<sub>12</sub>O<sub>7</sub>

Molecular Weight: 352.29437

ALogP: 2.975

Rotatable Bonds: 3

Acceptors: 7

Donors: 1

## Model Prediction

Prediction: Multiple-Carcinogen

Probability: 0.486

Enrichment: 1.19

Bayesian Score: 1.9

Mahalanobis Distance: 10

Mahalanobis Distance p-value: 0.0151

Prediction: Positive if the Bayesian score is above the estimated best cutoff value from minimizing the false positive and false negative rate.

Probability: The estimated probability that the sample is in the positive category. This assumes that the Bayesian score follows a normal distribution and is different from the prediction using a cutoff.

Enrichment: An estimate of enrichment, that is, the increased likelihood (versus random) of this sample being in the category.

Bayesian Score: The standard Laplacian-modified Bayesian score.

Mahalanobis Distance: The Mahalanobis distance (MD) is the distance to the center of the training data. The larger the MD, the less trustworthy the prediction.

Mahalanobis Distance p-value: The p-value gives the fraction of training data with an MD greater than or equal to the one for the given sample, assuming normally distributed data. The smaller the p-value, the less trustworthy the prediction. For highly non-normal X properties (e.g., fingerprints), the MD p-value is wildly inaccurate.

## Structural Similar Compounds

| Name               | Griseofulvin                                                        | Moricizine                                                          | Flunisolide                                                         |
|--------------------|---------------------------------------------------------------------|---------------------------------------------------------------------|---------------------------------------------------------------------|
| Structure          |                                                                     |                                                                     |                                                                     |
| Actual Endpoint    | Single-Carcinogen                                                   | Single-Carcinogen                                                   | Multiple-Carcinogen                                                 |
| Predicted Endpoint | Single-Carcinogen                                                   | Single-Carcinogen                                                   | Multiple-Carcinogen                                                 |
| Distance           | 0.647                                                               | 0.708                                                               | 0.780                                                               |
| Reference          | US FDA (Centre for Drug Eval.& Res./Off. Testing & Res.) Sept. 1997 | US FDA (Centre for Drug Eval.& Res./Off. Testing & Res.) Sept. 1997 | US FDA (Centre for Drug Eval.& Res./Off. Testing & Res.) Sept. 1997 |

## Model Applicability

Unknown features are fingerprint features in the query molecule, but not found or appearing too infrequently in the training set.

- OPS PC16 out of range. Value: 2.7241. Training min, max, SD, explained variance: -2.4118, 2.6996, 0.9803, 0.0176.
- Unknown ECFP\_2 feature: -741588105: [\*]O\C(=C[\*])\C(=[\*])[\*]

## Feature Contribution

| Top features for positive contribution |            |                                      |       |                                     |
|----------------------------------------|------------|--------------------------------------|-------|-------------------------------------|
| Fingerprint                            | Bit/Smiles | Feature Structure                    | Score | Multiple-Carcinogen in training set |
| ECFP_4                                 | 1573945311 | <br><chem>[*]OC(=O)C(=[*])[*]</chem> | 0.351 | 1 out of 1                          |

|                                        |             |                                                                                                                                                 |        |                                     |
|----------------------------------------|-------------|-------------------------------------------------------------------------------------------------------------------------------------------------|--------|-------------------------------------|
| ECFP_4                                 | 1305253718  | 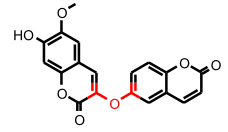<br><chem>[*]C(=[*])O[c](:[*]):</chem><br><chem>[*]</chem>   | 0.351  | 1 out of 1                          |
| ECFP_4                                 | -1885846789 | <br><chem>[*]OC(=O)C=[*]</chem>                              | 0.351  | 1 out of 1                          |
| Top Features for negative contribution |             |                                                                                                                                                 |        |                                     |
| Fingerprint                            | Bit/Smiles  | Feature Structure                                                                                                                               | Score  | Multiple-Carcinogen in training set |
| ECFP_4                                 | 1334400011  | <br><chem>[*][c](:[*]):[c](O):[cH]:[*]</chem>                | -0.8   | 0 out of 3                          |
| ECFP_4                                 | 1408898974  | <br><chem>[*]O[c](:[cH]:[*]):[c]([*]):[*]</chem>           | -0.545 | 1 out of 6                          |
| ECFP_4                                 | 464808839   | <br><chem>[*]C(=C[c](:[*]):[*])</chem><br><chem>[*]</chem> | -0.352 | 2 out of 8                          |



## new dicoumarin.cdx

## TOPKAT\_Mouse\_Male\_FDA\_None\_vs\_Carcinogen

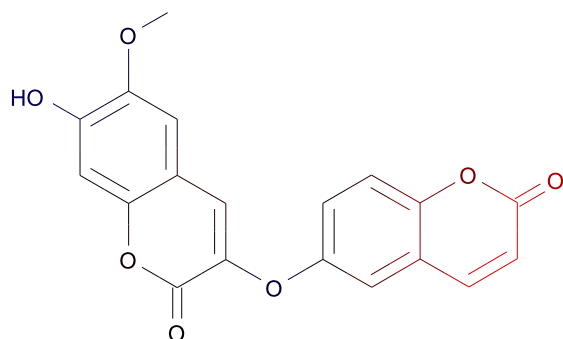

C<sub>19</sub>H<sub>12</sub>O<sub>7</sub>

Molecular Weight: 352.29437

ALogP: 2.975

Rotatable Bonds: 3

Acceptors: 7

Donors: 1

### Model Prediction

Prediction: Carcinogen

Probability: 0.346

Enrichment: 1.17

Bayesian Score: 1.37

Mahalanobis Distance: 14.6

Mahalanobis Distance p-value: 4.87e-007

Prediction: Positive if the Bayesian score is above the estimated best cutoff value from minimizing the false positive and false negative rate.

Probability: The estimated probability that the sample is in the positive category. This assumes that the Bayesian score follows a normal distribution and is different from the prediction using a cutoff.

Enrichment: An estimate of enrichment, that is, the increased likelihood (versus random) of this sample being in the category. Bayesian Score: The standard Laplacian-modified Bayesian score.

Mahalanobis Distance: The Mahalanobis distance (MD) is the distance to the center of the training data. The larger the MD, the less trustworthy the prediction.

Mahalanobis Distance p-value: The p-value gives the fraction of training data with an MD greater than or equal to the one for the given sample, assuming normally distributed data. The smaller the p-value, the less trustworthy the prediction. For highly non-normal X properties (e.g., fingerprints), the MD p-value is wildly inaccurate.

### Structural Similar Compounds

| Name               | Podofilox                                                           | Griseofulvin                                                        | Terazosin                                                           |
|--------------------|---------------------------------------------------------------------|---------------------------------------------------------------------|---------------------------------------------------------------------|
| Structure          |                                                                     |                                                                     |                                                                     |
| Actual Endpoint    | Non-Carcinogen                                                      | Carcinogen                                                          | Non-Carcinogen                                                      |
| Predicted Endpoint | Non-Carcinogen                                                      | Carcinogen                                                          | Non-Carcinogen                                                      |
| Distance           | 0.617                                                               | 0.628                                                               | 0.647                                                               |
| Reference          | US FDA (Centre for Drug Eval.& Res./Off. Testing & Res.) Sept. 1997 | US FDA (Centre for Drug Eval.& Res./Off. Testing & Res.) Sept. 1997 | US FDA (Centre for Drug Eval.& Res./Off. Testing & Res.) Sept. 1997 |

### Model Applicability

Unknown features are fingerprint features in the query molecule, but not found or appearing too infrequently in the training set.

1. All properties and OPS components are within expected ranges.

### Feature Contribution

#### Top features for positive contribution

| Fingerprint | Bit/Smiles | Feature Structure                         | Score | Carcinogen in training set |
|-------------|------------|-------------------------------------------|-------|----------------------------|
| FCFP_6      | -146015125 | <br>[*]=C1[*][c](:[*]):[c](:[cH]:[*])C=C1 | 0.676 | 2 out of 2                 |

| FCFP_6                                 | 451847724  | 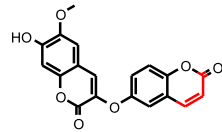<br><chem>[*]\C=C/C(=[*])[*]</chem>                                 | 0.479  | 21 out of 48               |
|----------------------------------------|------------|--------------------------------------------------------------------------------------------------------------------------------------------------------|--------|----------------------------|
| FCFP_6                                 | -948664610 | <br><chem>[*]:[cH]:[c]1OC(=O)C=C[c]:1.[*]</chem>                    | 0.46   | 1 out of 1                 |
| Top Features for negative contribution |            |                                                                                                                                                        |        |                            |
| Fingerprint                            | Bit/Smiles | Feature Structure                                                                                                                                      | Score  | Carcinogen in training set |
| FCFP_6                                 | 356782498  | <br><chem>[*]O[c]1:[cH]:[cH]:[c](OC(=[*]))[*]):[cH]:[c]:1[*]</chem> | -0.582 | 0 out of 3                 |
| FCFP_6                                 | 523826990  | <br><chem>[*]O[c]1:[cH]:[*]:[c]([*]):[cH]:[c]:1O</chem>           | -0.423 | 0 out of 2                 |
| FCFP_6                                 | 7          | <br><chem>[*]O</chem>                                             | -0.308 | 15 out of 79               |

# remdesivir

# TOPKAT\_Mouse\_Male\_FDA\_None\_vs\_Carcinogen

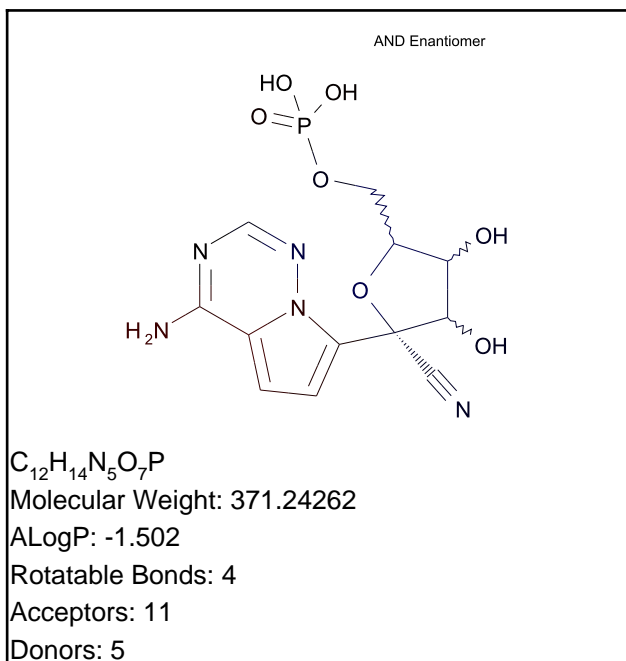

## Model Prediction

Prediction: Non-Carcinogen

Probability: 0.239

Enrichment: 0.812

Bayesian Score: -2.82

Mahalanobis Distance: 19.2

Mahalanobis Distance p-value: 7.81e-017

Prediction: Positive if the Bayesian score is above the estimated best cutoff value from minimizing the false positive and false negative rate.

Probability: The estimated probability that the sample is in the positive category. This assumes that the Bayesian score follows a normal distribution and is different from the prediction using a cutoff.

Enrichment: An estimate of enrichment, that is, the increased likelihood (versus random) of this sample being in the category. Bayesian Score: The standard Laplacian-modified Bayesian score.

Mahalanobis Distance: The Mahalanobis distance (MD) is the distance to the center of the training data. The larger the MD, the less trustworthy the prediction.

Mahalanobis Distance p-value: The p-value gives the fraction of training data with an MD greater than or equal to the one for the given sample, assuming normally distributed data. The smaller the p-value, the less trustworthy the prediction. For highly non-normal X properties (e.g., fingerprints), the MD p-value is wildly inaccurate.

## Structural Similar Compounds

| Name               | Famotidine                                                                          | Tetracycline                                                                        | Ribavirin                                                                           |
|--------------------|-------------------------------------------------------------------------------------|-------------------------------------------------------------------------------------|-------------------------------------------------------------------------------------|
| Structure          | 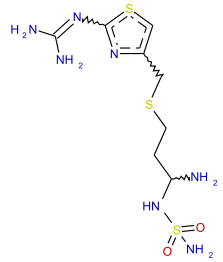 |  |  |
| Actual Endpoint    | Non-Carcinogen                                                                      | Non-Carcinogen                                                                      | Non-Carcinogen                                                                      |
| Predicted Endpoint | Non-Carcinogen                                                                      | Non-Carcinogen                                                                      | Non-Carcinogen                                                                      |
| Distance           | 0.813                                                                               | 0.843                                                                               | 0.860                                                                               |
| Reference          | US FDA (Centre for Drug Eval.& Res./Off. Testing & Res.) Sept. 1997                 | US FDA (Centre for Drug Eval.& Res./Off. Testing & Res.) Sept. 1997                 | US FDA (Centre for Drug Eval.& Res./Off. Testing & Res.) Sept. 1997                 |

## Model Applicability

Unknown features are fingerprint features in the query molecule, but not found or appearing too infrequently in the training set.

1. All properties and OPS components are within expected ranges.
2. Unknown FCFP\_2 feature: 472180098: [\*]OP(=O)(O)O
3. Unknown FCFP\_2 feature: -332197802: [\*][c]1:[\*]:[\*]:[c]([\*]):n:1:n:[\*]

## Feature Contribution

### Top features for positive contribution

| Fingerprint | Bit/Smiles | Feature Structure                                                                                                                                                       | Score | Carcinogen in training set |
|-------------|------------|-------------------------------------------------------------------------------------------------------------------------------------------------------------------------|-------|----------------------------|
| FCFP_6      | -450797925 | <p>AND Enantiomer</p> 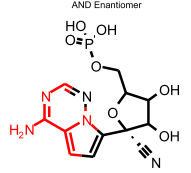 <p><chem>N[c]1n:[cH]:[*]:n2:[*]:[*]:[cH]:[c]:1:2</chem></p> | 0.676 | 2 out of 2                 |



|                                        |             |                                                                                                                                                                            |        |                            |
|----------------------------------------|-------------|----------------------------------------------------------------------------------------------------------------------------------------------------------------------------|--------|----------------------------|
| FCFP_6                                 | -1151884458 | <p>AND Enantiomer</p> 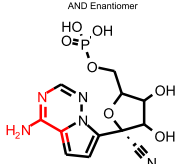 <p>[*]:n:[c](N):[c](:[*])<br/>):[*]</p>                          | 0.348  | 6 out of 15                |
| FCFP_6                                 | -1280036918 | <p>AND Enantiomer</p>  <p>[*]C([*])([*])[c]1:[c]<br/>H]:[cH]:[c](:[*]):n:<br/>1:[*]</p> | 0.333  | 7 out of 18                |
| Top Features for negative contribution |             |                                                                                                                                                                            |        |                            |
| Fingerprint                            | Bit/Smiles  | Feature Structure                                                                                                                                                          | Score  | Carcinogen in training set |
| FCFP_6                                 | -124685461  | <p>AND Enantiomer</p>  <p>[*]:n:[cH]:n:[*]</p>                                          | -0.731 | 1 out of 12                |
| FCFP_6                                 | -1277879912 | <p>AND Enantiomer</p>  <p>[*]C([*])([*])C#N</p>                                        | -0.582 | 0 out of 3                 |
| FCFP_6                                 | 422052003   | <p>AND Enantiomer</p>  <p>[*]CC1OC([*])([*])C(O)<br/>C1O</p>                          | -0.582 | 0 out of 3                 |

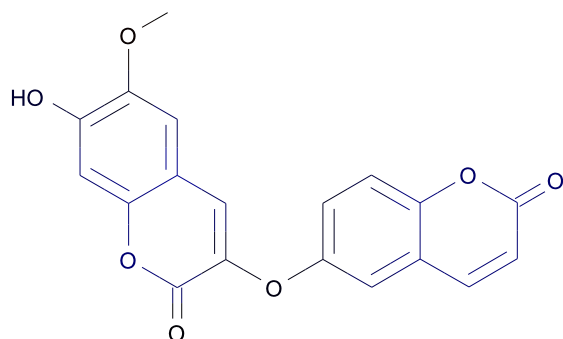C<sub>19</sub>H<sub>12</sub>O<sub>7</sub>

Molecular Weight: 352.29437

ALogP: 2.975

Rotatable Bonds: 3

Acceptors: 7

Donors: 1

## Model Prediction

Prediction: Single-Carcinogen

Probability: 0.146

Enrichment: 0.485

Bayesian Score: -8.75

Mahalanobis Distance: 12

Mahalanobis Distance p-value: 0.000614

Prediction: Positive if the Bayesian score is above the estimated best cutoff value from minimizing the false positive and false negative rate.

Probability: The estimated probability that the sample is in the positive category. This assumes that the Bayesian score follows a normal distribution and is different from the prediction using a cutoff.

Enrichment: An estimate of enrichment, that is, the increased likelihood (versus random) of this sample being in the category.

Bayesian Score: The standard Laplacian-modified Bayesian score.

Mahalanobis Distance: The Mahalanobis distance (MD) is the distance to the center of the training data. The larger the MD, the less trustworthy the prediction.

Mahalanobis Distance p-value: The p-value gives the fraction of training data with an MD greater than or equal to the one for the given sample, assuming normally distributed data. The smaller the p-value, the less trustworthy the prediction. For highly non-normal X properties (e.g., fingerprints), the MD p-value is wildly inaccurate.

## Structural Similar Compounds

| Name               | Griseofulvin                                                        | Flunisolide                                                         | Lansoprazole                                                        |
|--------------------|---------------------------------------------------------------------|---------------------------------------------------------------------|---------------------------------------------------------------------|
| Structure          |                                                                     |                                                                     |                                                                     |
| Actual Endpoint    | Single-Carcinogen                                                   | Single-Carcinogen                                                   | Single-Carcinogen                                                   |
| Predicted Endpoint | Single-Carcinogen                                                   | Single-Carcinogen                                                   | Single-Carcinogen                                                   |
| Distance           | 0.690                                                               | 0.820                                                               | 0.842                                                               |
| Reference          | US FDA (Centre for Drug Eval.& Res./Off. Testing & Res.) Sept. 1997 | US FDA (Centre for Drug Eval.& Res./Off. Testing & Res.) Sept. 1997 | US FDA (Centre for Drug Eval.& Res./Off. Testing & Res.) Sept. 1997 |

## Model Applicability

Unknown features are fingerprint features in the query molecule, but not found or appearing too infrequently in the training set.

1. All properties and OPS components are within expected ranges.

## Feature Contribution

### Top features for positive contribution

| Fingerprint | Bit/Smiles | Feature Structure                | Score | Multiple-Carcinogen in training set |
|-------------|------------|----------------------------------|-------|-------------------------------------|
| FCFP_12     | 451847724  | <br><chem>[*]C=C/C(=O)[*]</chem> | 0.3   | 10 out of 21                        |

|                                        |             |                                                                                                                                                    |        |                                     |
|----------------------------------------|-------------|----------------------------------------------------------------------------------------------------------------------------------------------------|--------|-------------------------------------|
| FCFP_12                                | 565998553   | 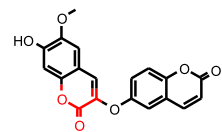<br><chem>[*]OC(=O)C(=[*])[*]</chem>                            | 0.194  | 6 out of 14                         |
| FCFP_12                                | 1676877079  | <br><chem>[*]O[c]1:[cH]:[c](C=[*]):[c]([*]):[*]:[c]:1[*]</chem> | 0.168  | 3 out of 7                          |
| Top Features for negative contribution |             |                                                                                                                                                    |        |                                     |
| Fingerprint                            | Bit/Smiles  | Feature Structure                                                                                                                                  | Score  | Multiple-Carcinogen in training set |
| FCFP_12                                | -1099193755 | <br><chem>[*][c]1:[*]:[cH]:[c]2C=[*]C(=[*])O[c]:2:[cH]:1</chem> | -1.11  | 0 out of 6                          |
| FCFP_12                                | 7           | <br><chem>[*]O</chem>                                         | -0.71  | 2 out of 15                         |
| FCFP_12                                | -146015125  | <br><chem>[*]=C1[*][c](:[*]):[c](:[cH]:[*])C=C1</chem>        | -0.519 | 0 out of 2                          |



## new dicoumarin.cdx

## TOPKAT\_Ocular\_Irritancy\_Mild\_vs\_Moderate\_Severe

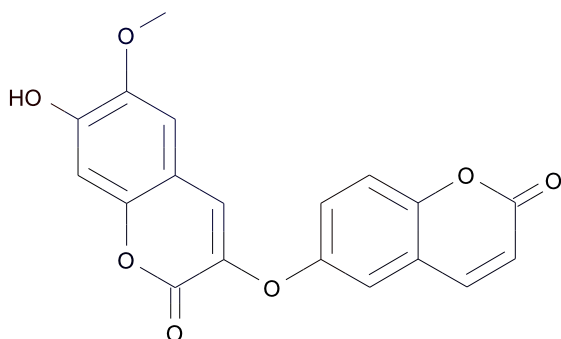

$C_{19}H_{12}O_7$

Molecular Weight: 352.29437

ALogP: 2.975

Rotatable Bonds: 3

Acceptors: 7

Donors: 1

### Model Prediction

Prediction: Mild

Probability: 0.778

Enrichment: 1.13

Bayesian Score: -1.75

Mahalanobis Distance: 9.34

Mahalanobis Distance p-value: 0.332

Prediction: Positive if the Bayesian score is above the estimated best cutoff value from minimizing the false positive and false negative rate.

Probability: The estimated probability that the sample is in the positive category. This assumes that the Bayesian score follows a normal distribution and is different from the prediction using a cutoff.

Enrichment: An estimate of enrichment, that is, the increased likelihood (versus random) of this sample being in the category.

Bayesian Score: The standard Laplacian-modified Bayesian score.

Mahalanobis Distance: The Mahalanobis distance (MD) is the distance to the center of the training data. The larger the MD, the less trustworthy the prediction.

Mahalanobis Distance p-value: The p-value gives the fraction of training data with an MD greater than or equal to the one for the given sample, assuming normally distributed data. The smaller the p-value, the less trustworthy the prediction. For highly non-normal X properties (e.g., fingerprints), the MD p-value is wildly inaccurate.

### Structural Similar Compounds

| Name               | COLCHICINE       | 2;5-DICHLORO-4(3'-METHYL-5' PYRAZOLON-1'-YL)BENZENE SULFONIC ACID | 1;8;9-ANTHRACENETRIOL; TRIACETATE |
|--------------------|------------------|-------------------------------------------------------------------|-----------------------------------|
| Structure          |                  |                                                                   |                                   |
| Actual Endpoint    | Moderate_Severe  | Mild                                                              | Moderate_Severe                   |
| Predicted Endpoint | Moderate_Severe  | Mild                                                              | Moderate_Severe                   |
| Distance           | 0.621            | 0.709                                                             | 0.729                             |
| Reference          | AJOPAA 31;837;48 | 28ZPAK-;186;72                                                    | BJOPAL 53;819;69                  |

### Model Applicability

Unknown features are fingerprint features in the query molecule, but not found or appearing too infrequently in the training set.

1. All properties and OPS components are within expected ranges.

### Feature Contribution

| Top features for positive contribution |            |                   |       |                                 |
|----------------------------------------|------------|-------------------|-------|---------------------------------|
| Fingerprint                            | Bit/Smiles | Feature Structure | Score | Moderate_Severe in training set |
| FCFP_10                                | 7          | <br>[*]O          | 0.219 | 117 out of 142                  |

|                                        |             |                                                                                                                                                      |        |                                 |
|----------------------------------------|-------------|------------------------------------------------------------------------------------------------------------------------------------------------------|--------|---------------------------------|
| FCFP_10                                | 346218766   | 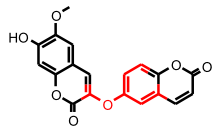<br><chem>[*]C(=[*])O[c]1:[cH]:[cH]:[*]:[c]([*]):[cH]:1</chem>    | 0.197  | 30 out of 37                    |
| FCFP_10                                | 523826990   | <br><chem>[*]O[c]1:[cH]:[*]:[c]([*]):[cH]:[c]:1O</chem>           | 0.186  | 1 out of 1                      |
| Top Features for negative contribution |             |                                                                                                                                                      |        |                                 |
| Fingerprint                            | Bit/Smiles  | Feature Structure                                                                                                                                    | Score  | Moderate_Severe in training set |
| FCFP_10                                | -1977641857 | <br><chem>[*][c](:[*]):[c](OC):[cH]:[*]</chem>                    | -0.78  | 4 out of 15                     |
| FCFP_10                                | -146015125  | <br><chem>[*]=C1[*][c](:[*]):[c](:[cH]):[*])C=C1</chem>         | -0.507 | 0 out of 1                      |
| FCFP_10                                | -1099193755 | <br><chem>[*][c]1:[*]:[cH]:[c]2C=[*]C(=[*])O[c]:2:[cH]:1</chem> | -0.361 | 2 out of 5                      |

# remdesivir

# TOPKAT\_Ocular\_Irritancy\_Mild\_vs\_Moderate\_Severe

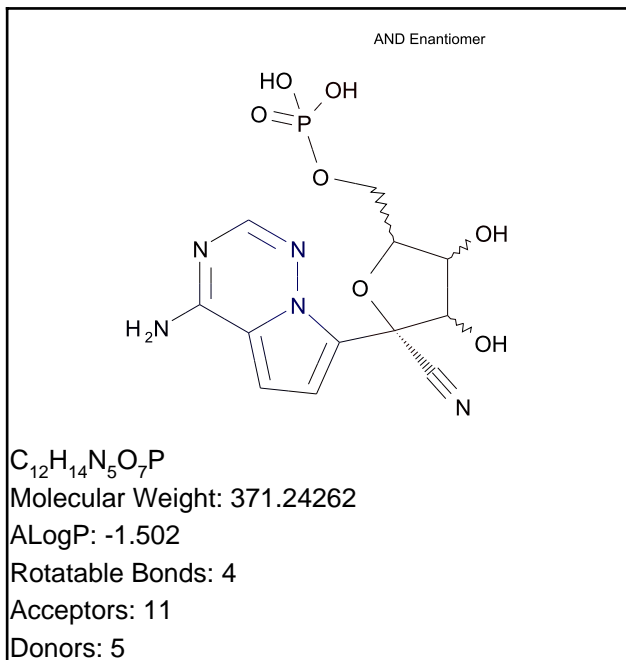

## Model Prediction

Prediction: Mild

Probability: 0.789

Enrichment: 1.15

Bayesian Score: -1.39

Mahalanobis Distance: 13.8

Mahalanobis Distance p-value: 1.42e-009

Prediction: Positive if the Bayesian score is above the estimated best cutoff value from minimizing the false positive and false negative rate.

Probability: The estimated probability that the sample is in the positive category. This assumes that the Bayesian score follows a normal distribution and is different from the prediction using a cutoff.

Enrichment: An estimate of enrichment, that is, the increased likelihood (versus random) of this sample being in the category.

Bayesian Score: The standard Laplacian-modified Bayesian score.

Mahalanobis Distance: The Mahalanobis distance (MD) is the distance to the center of the training data. The larger the MD, the less trustworthy the prediction.

Mahalanobis Distance p-value: The p-value gives the fraction of training data with an MD greater than or equal to the one for the given sample, assuming normally distributed data. The smaller the p-value, the less trustworthy the prediction. For highly non-normal X properties (e.g., fingerprints), the MD p-value is wildly inaccurate.

## Structural Similar Compounds

| Name               | 1;3;6-NAPHTHALENE TRISULFONIC ACID;7-AMINO- | Methanol; (s-triazine-2;4;6-triyltrinitrilo)hexa-                     | 2;2'-Biphenyldisulfonic acid; 4;4'-diamino-                             |
|--------------------|---------------------------------------------|-----------------------------------------------------------------------|-------------------------------------------------------------------------|
| Structure          |                                             |                                                                       |                                                                         |
| Actual Endpoint    | Mild                                        | Moderate_Severe                                                       | Mild                                                                    |
| Predicted Endpoint | Mild                                        | Moderate_Severe                                                       | Mild                                                                    |
| Distance           | 0.776                                       | 0.802                                                                 | 0.878                                                                   |
| Reference          | 28ZPAK-;190;72                              | Prehled Prumyslove Toxikologie; Organicke Latky; Marhold; J. -;876;86 | Prehled Prumyslove Toxikologie; Organicke Latky; Marhold; J. pp 1061;86 |

## Model Applicability

Unknown features are fingerprint features in the query molecule, but not found or appearing too infrequently in the training set.

- OPS PC17 out of range. Value: 4.6782. Training min, max, SD, explained variance: -4.348, 3.9505, 1.094, 0.0146.
- Unknown FCFP\_2 feature: 472180098: [\*]OP(=O)(O)O
- Unknown FCFP\_2 feature: -836603894: [\*]C1[\*][\*]O[C@]1(C#[\*])[c]([\*]):[\*]
- Unknown FCFP\_2 feature: -124685461: [\*]:n:[cH]:n:[\*]
- Unknown FCFP\_2 feature: -1151884458: [\*]:n:[c](N):[c]([\*]):[\*]

## Feature Contribution

### Top features for positive contribution

| Fingerprint | Bit/Smiles | Feature Structure | Score | Moderate_Severe in training set |
|-------------|------------|-------------------|-------|---------------------------------|
|-------------|------------|-------------------|-------|---------------------------------|

|                                        |             |                                                                                                                                                            |        |                                    |
|----------------------------------------|-------------|------------------------------------------------------------------------------------------------------------------------------------------------------------|--------|------------------------------------|
| FCFP_10                                | 1070061035  | <p>AND Enantiomer</p> 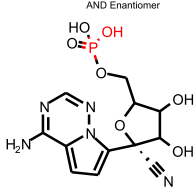 <p>[*]P(=[*])([*])O</p>                          | 0.239  | 284 out of 338                     |
| FCFP_10                                | -1539132615 | <p>AND Enantiomer</p>  <p>[*]C([*])([*])[c]1:[c<br/>H]:[*]:n:1:[*]</p>  | 0.224  | 11 out of 13                       |
| FCFP_10                                | -1043250487 | <p>AND Enantiomer</p>  <p>[*]C1[*][*]C([*])C1O</p>                      | 0.22   | 62 out of 75                       |
| Top Features for negative contribution |             |                                                                                                                                                            |        |                                    |
| Fingerprint                            | Bit/Smiles  | Feature Structure                                                                                                                                          | Score  | Moderate_Severe<br>in training set |
| FCFP_10                                | 4427049     | <p>AND Enantiomer</p>  <p>[*]:[cH]:n:n(:[*]):[*]<br/>]</p>             | -1.29  | 0 out of 4                         |
| FCFP_10                                | -332197802  | <p>AND Enantiomer</p>  <p>[*][c]1:[*]:[*]:[c](<br/>[*]):n:1:n:[*]</p> | -0.507 | 0 out of 1                         |



|         |           |                                                                                                                                                                          |        |             |
|---------|-----------|--------------------------------------------------------------------------------------------------------------------------------------------------------------------------|--------|-------------|
| FCFP_10 | 713358128 | <p>AND Enantiomer</p> 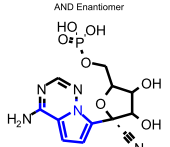 <p>[*][c](:[*]):[c]1:[cH]<br/>]:[cH]:[c]([*]):n:1:<br/>[*]</p> | -0.307 | 8 out of 17 |
|---------|-----------|--------------------------------------------------------------------------------------------------------------------------------------------------------------------------|--------|-------------|

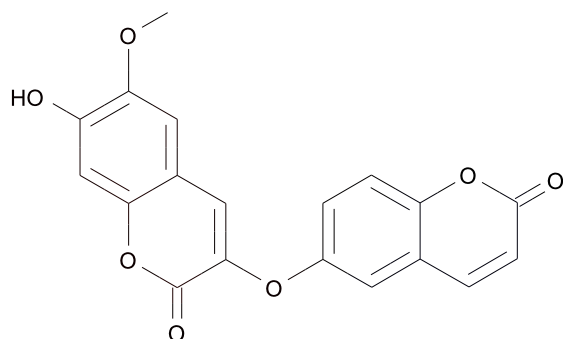C<sub>19</sub>H<sub>12</sub>O<sub>7</sub>

Molecular Weight: 352.29437

ALogP: 2.975

Rotatable Bonds: 3

Acceptors: 7

Donors: 1

## Model Prediction

Prediction: Irritant

Probability: 1

Enrichment: 1.18

Bayesian Score: 0.645

Mahalanobis Distance: 8.38

Mahalanobis Distance p-value: 0.813

Prediction: Positive if the Bayesian score is above the estimated best cutoff value from minimizing the false positive and false negative rate.

Probability: The estimated probability that the sample is in the positive category. This assumes that the Bayesian score follows a normal distribution and is different from the prediction using a cutoff.

Enrichment: An estimate of enrichment, that is, the increased likelihood (versus random) of this sample being in the category.

Bayesian Score: The standard Laplacian-modified Bayesian score.

Mahalanobis Distance: The Mahalanobis distance (MD) is the distance to the center of the training data. The larger the MD, the less trustworthy the prediction.

Mahalanobis Distance p-value: The p-value gives the fraction of training data with an MD greater than or equal to the one for the given sample, assuming normally distributed data. The smaller the p-value, the less trustworthy the prediction. For highly non-normal X properties (e.g., fingerprints), the MD p-value is wildly inaccurate.

## Structural Similar Compounds

| Name               | COLCHICINE       | 2,5-DICHLORO-4(3'-METHYL-5' PYRAZOLON-1'-YL)BENZENE SULFONIC ACID | 1;8;9-ANTHRACENETRIOL; TRIACETATE |
|--------------------|------------------|-------------------------------------------------------------------|-----------------------------------|
| Structure          |                  |                                                                   |                                   |
| Actual Endpoint    | Irritant         | Irritant                                                          | Irritant                          |
| Predicted Endpoint | Irritant         | Irritant                                                          | Irritant                          |
| Distance           | 0.616            | 0.697                                                             | 0.728                             |
| Reference          | AJOPAA 31;837;48 | 28ZPAK-;186;72                                                    | BJOPAL 53;819;69                  |

## Model Applicability

Unknown features are fingerprint features in the query molecule, but not found or appearing too infrequently in the training set.

- All properties and OPS components are within expected ranges.

## Feature Contribution

| Top features for positive contribution |             |                                                        |       |                          |
|----------------------------------------|-------------|--------------------------------------------------------|-------|--------------------------|
| Fingerprint                            | Bit/Smiles  | Feature Structure                                      | Score | Irritant in training set |
| FCFP_12                                | -1979033238 | <br><chem>[*]C1=[*][c]([*]):[c](OC1=O):[cH]:[*]</chem> | 0.192 | 10 out of 10             |

|                                        |             |                                                                                                                                                                     |        |                          |
|----------------------------------------|-------------|---------------------------------------------------------------------------------------------------------------------------------------------------------------------|--------|--------------------------|
| FCFP_12                                | -1099193755 | 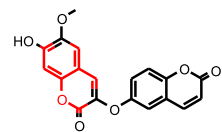<br><chem>[*][c]1:[*]:[cH]:[c]2</chem><br><chem>C=[*]C(=[*])O[c]:2:[cH]:1</chem> | 0.175  | 5 out of 5               |
| FCFP_12                                | 436915834   | <br><chem>[*]O[C(=C[*])C(=[*])[*]]</chem>                                        | 0.167  | 4 out of 4               |
| Top Features for negative contribution |             |                                                                                                                                                                     |        |                          |
| Fingerprint                            | Bit/Smiles  | Feature Structure                                                                                                                                                   | Score  | Irritant in training set |
| FCFP_12                                | -146015125  | <br><chem>[*]=C1[*][c](:[*]):[c]([cH]:[*])C=C1</chem>                            | -0.268 | 1 out of 2               |
| FCFP_12                                | 1673930087  | <br><chem>[*]O[c]1:[cH]:[c](O):[c]([*]):[*]:[c]:1[*]</chem>                    | -0.218 | 5 out of 8               |
| FCFP_12                                | 451371068   | <br><chem>[*]C(=C[c](:[*]):[*])[*]</chem>                                      | -0.167 | 6 out of 9               |

# remdesivir

# TOPKAT\_Ocular\_Irritancy\_None\_vs\_Irritant

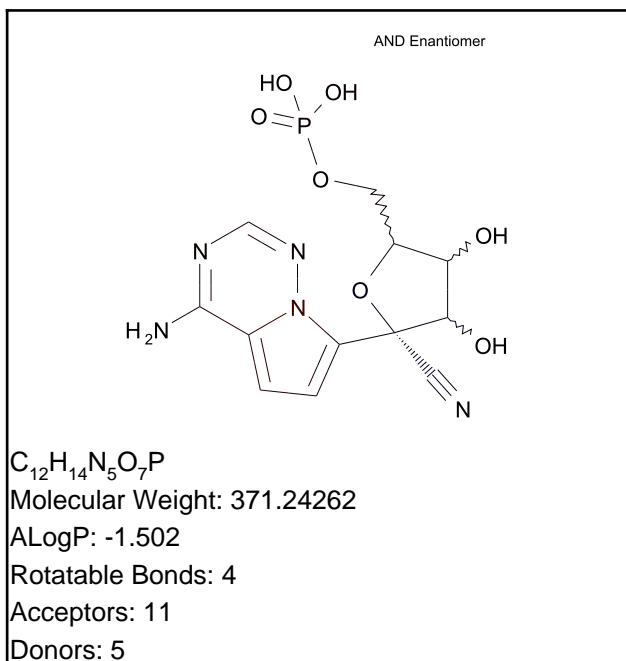

## Model Prediction

Prediction: Irritant

Probability: 1

Enrichment: 1.18

Bayesian Score: 1.33

Mahalanobis Distance: 10.7

Mahalanobis Distance p-value: 0.0147

Prediction: Positive if the Bayesian score is above the estimated best cutoff value from minimizing the false positive and false negative rate.

Probability: The estimated probability that the sample is in the positive category. This assumes that the Bayesian score follows a normal distribution and is different from the prediction using a cutoff.

Enrichment: An estimate of enrichment, that is, the increased likelihood (versus random) of this sample being in the category.

Bayesian Score: The standard Laplacian-modified Bayesian score.

Mahalanobis Distance: The Mahalanobis distance (MD) is the distance to the center of the training data. The larger the MD, the less trustworthy the prediction.

Mahalanobis Distance p-value: The p-value gives the fraction of training data with an MD greater than or equal to the one for the given sample, assuming normally distributed data. The smaller the p-value, the less trustworthy the prediction. For highly non-normal X properties (e.g., fingerprints), the MD p-value is wildly inaccurate.

## Structural Similar Compounds

| Name               | 1;3;6-NAPHTHALENE TRISULFONIC ACID;7-AMINO-                                         | Methanol; (s-triazine-2;4;6-triyltrinitrilo)hexa-                                   | 2;2'-Biphenyldisulfonic acid; 4;4'-diamino-                                         |
|--------------------|-------------------------------------------------------------------------------------|-------------------------------------------------------------------------------------|-------------------------------------------------------------------------------------|
| Structure          | 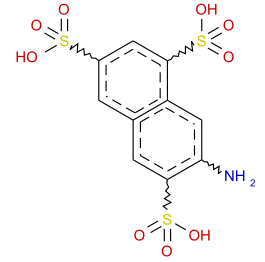 |  |  |
| Actual Endpoint    | Irritant                                                                            | Irritant                                                                            | Irritant                                                                            |
| Predicted Endpoint | Irritant                                                                            | Irritant                                                                            | Irritant                                                                            |
| Distance           | 0.766                                                                               | 0.795                                                                               | 0.859                                                                               |
| Reference          | 28ZPAK-;190;72                                                                      | Prehled Prumyslove Toxikologie; Organicke Latky; Marhold; J. -;876;86               | Prehled Prumyslove Toxikologie; Organicke Latky; Marhold; J. pp 1061;86             |

## Model Applicability

Unknown features are fingerprint features in the query molecule, but not found or appearing too infrequently in the training set.

1. All properties and OPS components are within expected ranges.
2. Unknown FCFP\_2 feature: 472180098: [\*]OP(=O)(O)O
3. Unknown FCFP\_2 feature: -124685461: [\*]:n:[cH]:n:[\*]
4. Unknown FCFP\_2 feature: -1151884458: [\*]:n:[c](N):[c](:[\*]):[\*]

## Feature Contribution

### Top features for positive contribution

| Fingerprint | Bit/Smiles | Feature Structure | Score | Irritant in training set |
|-------------|------------|-------------------|-------|--------------------------|
|             |            |                   |       |                          |

|                                        |             |                                                                                                                                                               |         |                          |
|----------------------------------------|-------------|---------------------------------------------------------------------------------------------------------------------------------------------------------------|---------|--------------------------|
| FCFP_12                                | 1747237384  | <p>AND Enantiomer</p> 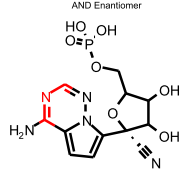 <p>[*][c](:[*]):n:[cH]:[*]</p>                      | 0.208   | 44 out of 44             |
| FCFP_12                                | 178336375   | <p>AND Enantiomer</p>  <p>[*][c](:[*]):[c]1:[cH]:[*]:[*]:n:1:[*]</p>       | 0.202   | 19 out of 19             |
| FCFP_12                                | 713358128   | <p>AND Enantiomer</p>  <p>[*][c](:[*]):[c]1:[cH]:[cH]:[c]([*]):n:1:[*]</p> | 0.2     | 17 out of 17             |
| Top Features for negative contribution |             |                                                                                                                                                               |         |                          |
| Fingerprint                            | Bit/Smiles  | Feature Structure                                                                                                                                             | Score   | Irritant in training set |
| FCFP_12                                | -836603894  | <p>AND Enantiomer</p>  <p>[*]C1[*][*]O[C@]1(C#[N])[c](:[*]):[*]</p>       | -0.592  | 0 out of 1               |
| FCFP_12                                | -1277879912 | <p>AND Enantiomer</p>  <p>[*]C([*])([*])C#N</p>                          | -0.0939 | 33 out of 45             |

|         |             |                                                                                                                                   |   |                |
|---------|-------------|-----------------------------------------------------------------------------------------------------------------------------------|---|----------------|
| FCFP_12 | -1272768868 | <p>AND Enantiomer</p> 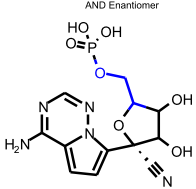 <p>[*]OCC([*])([*])</p> | 0 | 396 out of 514 |
|---------|-------------|-----------------------------------------------------------------------------------------------------------------------------------|---|----------------|

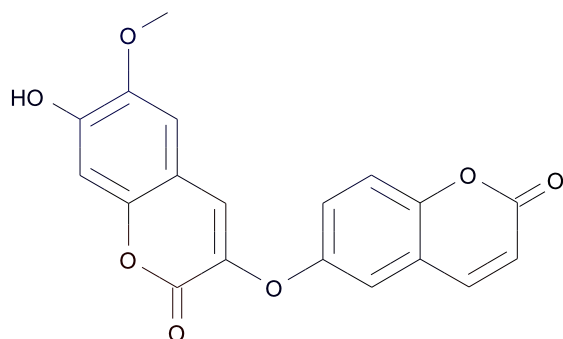C<sub>19</sub>H<sub>12</sub>O<sub>7</sub>

Molecular Weight: 352.29437

ALogP: 2.975

Rotatable Bonds: 3

Acceptors: 7

Donors: 1

## Model Prediction

Prediction: Carcinogen

Probability: 0.284

Enrichment: 0.883

Bayesian Score: -0.721

Mahalanobis Distance: 11.6

Mahalanobis Distance p-value: 0.0154

Prediction: Positive if the Bayesian score is above the estimated best cutoff value from minimizing the false positive and false negative rate.

Probability: The estimated probability that the sample is in the positive category. This assumes that the Bayesian score follows a normal distribution and is different from the prediction using a cutoff.

Enrichment: An estimate of enrichment, that is, the increased likelihood (versus random) of this sample being in the category.

Bayesian Score: The standard Laplacian-modified Bayesian score.

Mahalanobis Distance: The Mahalanobis distance (MD) is the distance to the center of the training data. The larger the MD, the less trustworthy the prediction.

Mahalanobis Distance p-value: The p-value gives the fraction of training data with an MD greater than or equal to the one for the given sample, assuming normally distributed data. The smaller the p-value, the less trustworthy the prediction. For highly non-normal X properties (e.g., fingerprints), the MD p-value is wildly inaccurate.

## Structural Similar Compounds

| Name               | Prazocin                                                            | Isradipine                                                          | Nifedipine                                                          |
|--------------------|---------------------------------------------------------------------|---------------------------------------------------------------------|---------------------------------------------------------------------|
| Structure          |                                                                     |                                                                     |                                                                     |
| Actual Endpoint    | Non-Carcinogen                                                      | Non-Carcinogen                                                      | Non-Carcinogen                                                      |
| Predicted Endpoint | Non-Carcinogen                                                      | Non-Carcinogen                                                      | Non-Carcinogen                                                      |
| Distance           | 0.587                                                               | 0.605                                                               | 0.617                                                               |
| Reference          | US FDA (Centre for Drug Eval.& Res./Off. Testing & Res.) Sept. 1997 | US FDA (Centre for Drug Eval.& Res./Off. Testing & Res.) Sept. 1997 | US FDA (Centre for Drug Eval.& Res./Off. Testing & Res.) Sept. 1997 |

## Model Applicability

Unknown features are fingerprint features in the query molecule, but not found or appearing too infrequently in the training set.

1. All properties and OPS components are within expected ranges.
2. Unknown ECFP\_2 feature: -741588105: [\*]O\C(=C[\*])\C(=[\*])[\*]

## Feature Contribution

### Top features for positive contribution

| Fingerprint | Bit/Smiles | Feature Structure       | Score | Carcinogen in training set |
|-------------|------------|-------------------------|-------|----------------------------|
| ECFP_12     | 1573945311 | <br>[*]OC(=O)C(=[*])[*] | 0.575 | 3 out of 4                 |

| ECFP_12                                | 683445015  | 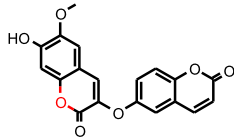<br><chem>[*]O[*]</chem>                          | 0.294  | 28 out of 66               |
|----------------------------------------|------------|--------------------------------------------------------------------------------------------------------------------------------------|--------|----------------------------|
| ECFP_12                                | 133666212  | <br><chem>[*][c](:[*]):[c](C=[*]):[cH]:[*]</chem> | 0.288  | 2 out of 4                 |
| Top Features for negative contribution |            |                                                                                                                                      |        |                            |
| Fingerprint                            | Bit/Smiles | Feature Structure                                                                                                                    | Score  | Carcinogen in training set |
| ECFP_12                                | 1408898974 | <br><chem>[*]O[c](:[cH]:[*]):[c]([*]):[*]</chem>  | -0.517 | 5 out of 29                |
| ECFP_12                                | 1305253718 | <br><chem>[*]C(=[*])O[c](:[*]):[*]</chem>        | -0.485 | 0 out of 2                 |
| ECFP_12                                | 1680623188 | <br><chem>[*][c](:[*]):[c](OC):[cH]:[*]</chem>  | -0.295 | 3 out of 14                |



# remdesivir

# TOPKAT\_Rat\_Female\_FDA\_None\_vs\_Carcinogen

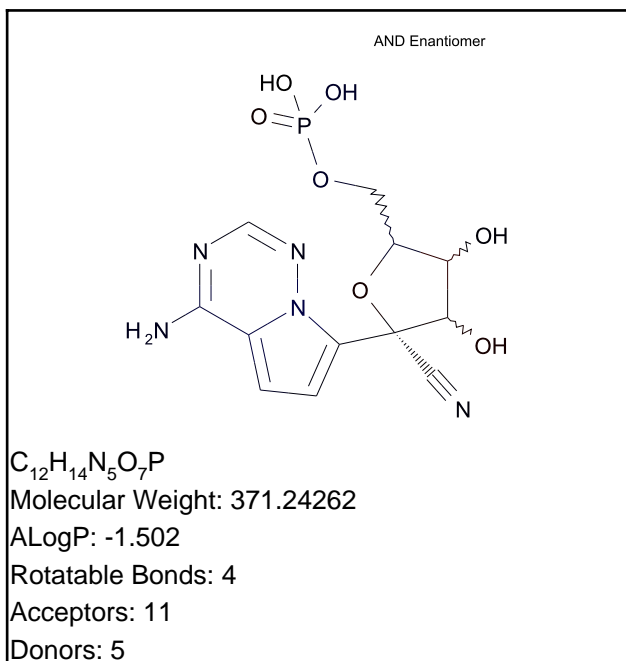

## Model Prediction

Prediction: Non-Carcinogen

Probability: 0.243

Enrichment: 0.756

Bayesian Score: -3.24

Mahalanobis Distance: 13.8

Mahalanobis Distance p-value: 5.04e-006

Prediction: Positive if the Bayesian score is above the estimated best cutoff value from minimizing the false positive and false negative rate.

Probability: The estimated probability that the sample is in the positive category. This assumes that the Bayesian score follows a normal distribution and is different from the prediction using a cutoff.

Enrichment: An estimate of enrichment, that is, the increased likelihood (versus random) of this sample being in the category. Bayesian Score: The standard Laplacian-modified Bayesian score.

Mahalanobis Distance: The Mahalanobis distance (MD) is the distance to the center of the training data. The larger the MD, the less trustworthy the prediction.

Mahalanobis Distance p-value: The p-value gives the fraction of training data with an MD greater than or equal to the one for the given sample, assuming normally distributed data. The smaller the p-value, the less trustworthy the prediction. For highly non-normal X properties (e.g., fingerprints), the MD p-value is wildly inaccurate.

## Structural Similar Compounds

| Name               | Streptozocin                                                                        | Tetracycline                                                                        | Famotidine                                                                          |
|--------------------|-------------------------------------------------------------------------------------|-------------------------------------------------------------------------------------|-------------------------------------------------------------------------------------|
| Structure          | 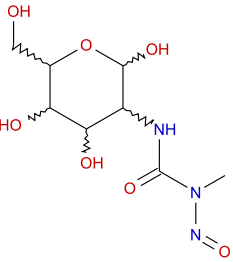 |  |  |
| Actual Endpoint    | Carcinogen                                                                          | Non-Carcinogen                                                                      | Non-Carcinogen                                                                      |
| Predicted Endpoint | Carcinogen                                                                          | Non-Carcinogen                                                                      | Non-Carcinogen                                                                      |
| Distance           | 0.810                                                                               | 0.858                                                                               | 0.861                                                                               |
| Reference          | US FDA (Centre for Drug Eval.& Res./Off. Testing & Res.) Sept. 1997                 | US FDA (Centre for Drug Eval.& Res./Off. Testing & Res.) Sept. 1997                 | US FDA (Centre for Drug Eval.& Res./Off. Testing & Res.) Sept. 1997                 |

## Model Applicability

Unknown features are fingerprint features in the query molecule, but not found or appearing too infrequently in the training set.

1. All properties and OPS components are within expected ranges.
2. Unknown ECFP\_2 feature: 1126642748: [\*]OP(=O)(O)O
3. Unknown ECFP\_2 feature: -1250439909: [\*]COP(=[\*])([\*])[\*]
4. Unknown ECFP\_2 feature: 1258791451: [\*]C1[\*][\*]O[C@]1(C#[\*])[c](:[\*]):[\*]
5. Unknown ECFP\_2 feature: -1507082173: [\*][c]1:[\*]:[\*]:[c](:[\*]):n:1:n:[\*]
6. Unknown ECFP\_2 feature: -66263742: [\*]C([\*])([\*])[c]1:[cH]:[\*]:[\*]:n:1:[\*]

## Feature Contribution

### Top features for positive contribution

| Fingerprint | Bit/Smiles | Feature Structure | Score | Carcinogen in training set |
|-------------|------------|-------------------|-------|----------------------------|
|             |            |                   |       |                            |

|                                        |             |                                                                                                                                            |        |                            |
|----------------------------------------|-------------|--------------------------------------------------------------------------------------------------------------------------------------------|--------|----------------------------|
| ECFP_12                                | -553149446  | <p>AND Enantiomer</p> 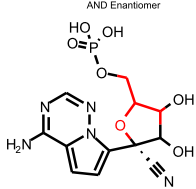 <p>[*]CC1O[*][*]C1[*]</p>        | 0.575  | 3 out of 4                 |
| ECFP_12                                | -1114776580 | <p>AND Enantiomer</p>  <p>[*]C#[*]</p>                  | 0.461  | 10 out of 19               |
| ECFP_12                                | -521596699  | <p>AND Enantiomer</p>  <p>[*]C1[*][*]C([*])([*])C1O</p> | 0.445  | 3 out of 5                 |
| Top Features for negative contribution |             |                                                                                                                                            |        |                            |
| Fingerprint                            | Bit/Smiles  | Feature Structure                                                                                                                          | Score  | Carcinogen in training set |
| ECFP_12                                | -1687549011 | <p>AND Enantiomer</p>  <p>[*]OCC([*])[*]</p>           | -0.661 | 0 out of 3                 |
| ECFP_12                                | 2024329577  | <p>AND Enantiomer</p>  <p>[*]P(=[*])([*])O</p>        | -0.661 | 0 out of 3                 |

ECFP\_12

-1734834311

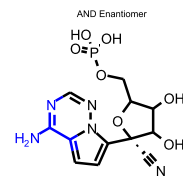

[\*]:n:[c](N):[c](:[\*]  
):[\*]

-0.56

1 out of 8

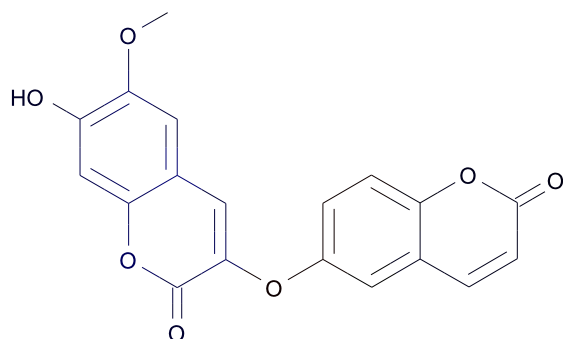C<sub>19</sub>H<sub>12</sub>O<sub>7</sub>

Molecular Weight: 352.29437

ALogP: 2.975

Rotatable Bonds: 3

Acceptors: 7

Donors: 1

## Model Prediction

Prediction: Single-Carcinogen

Probability: 0.383

Enrichment: 1.02

Bayesian Score: -3.51

Mahalanobis Distance: 15.4

Mahalanobis Distance p-value: 1.35e-006

Prediction: Positive if the Bayesian score is above the estimated best cutoff value from minimizing the false positive and false negative rate.

Probability: The estimated probability that the sample is in the positive category. This assumes that the Bayesian score follows a normal distribution and is different from the prediction using a cutoff.

Enrichment: An estimate of enrichment, that is, the increased likelihood (versus random) of this sample being in the category.

Bayesian Score: The standard Laplacian-modified Bayesian score.

Mahalanobis Distance: The Mahalanobis distance (MD) is the distance to the center of the training data. The larger the MD, the less trustworthy the prediction.

Mahalanobis Distance p-value: The p-value gives the fraction of training data with an MD greater than or equal to the one for the given sample, assuming normally distributed data. The smaller the p-value, the less trustworthy the prediction. For highly non-normal X properties (e.g., fingerprints), the MD p-value is wildly inaccurate.

## Structural Similar Compounds

| Name               | Griseofulvin                                                        | Estrogens; conjug.                                                  | Omeprazole                                                          |
|--------------------|---------------------------------------------------------------------|---------------------------------------------------------------------|---------------------------------------------------------------------|
| Structure          |                                                                     |                                                                     |                                                                     |
| Actual Endpoint    | Single-Carcinogen                                                   | Single-Carcinogen                                                   | Multiple-Carcinogen                                                 |
| Predicted Endpoint | Single-Carcinogen                                                   | Single-Carcinogen                                                   | Multiple-Carcinogen                                                 |
| Distance           | 0.612                                                               | 0.647                                                               | 0.651                                                               |
| Reference          | US FDA (Centre for Drug Eval.& Res./Off. Testing & Res.) Sept. 1997 | US FDA (Centre for Drug Eval.& Res./Off. Testing & Res.) Sept. 1997 | US FDA (Centre for Drug Eval.& Res./Off. Testing & Res.) Sept. 1997 |

## Model Applicability

Unknown features are fingerprint features in the query molecule, but not found or appearing too infrequently in the training set.

1. All properties and OPS components are within expected ranges.

## Feature Contribution

### Top features for positive contribution

| Fingerprint | Bit/Smiles  | Feature Structure                  | Score | Multiple-Carcinogen in training set |
|-------------|-------------|------------------------------------|-------|-------------------------------------|
| SCFP_4      | -1971196727 | <br><chem>[*]C=C/C(=[*])[*]</chem> | 0.295 | 5 out of 11                         |

|                                        |             |                                                                                                                                                      |        |                                     |
|----------------------------------------|-------------|------------------------------------------------------------------------------------------------------------------------------------------------------|--------|-------------------------------------|
| SCFP_4                                 | -1374800107 | 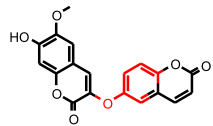<br><chem>[*]O[c]1:[cH]:[*]:[c]([*]):[cH]:[cH]:1</chem>           | 0.288  | 10 out of 23                        |
| SCFP_4                                 | -424425761  | <br><chem>[*]:[c](:[*])O</chem>                                   | 0.201  | 6 out of 15                         |
| Top Features for negative contribution |             |                                                                                                                                                      |        |                                     |
| Fingerprint                            | Bit/Smiles  | Feature Structure                                                                                                                                    | Score  | Multiple-Carcinogen in training set |
| SCFP_4                                 | 1132907712  | <br><chem>[*]OC(=O)C(=[*])[*]</chem>                              | -0.651 | 1 out of 9                          |
| SCFP_4                                 | 392579710   | <br><chem>[*]O[c]1:[cH]:[c](C=[*]):[c]([*]):[*]:[c]:1[*]</chem> | -0.489 | 0 out of 2                          |
| SCFP_4                                 | 130348166   | <br><chem>[*]O[c]1:[cH]:[c](O):[c]([*]):[*]:[c]:1[*]</chem>     | -0.489 | 0 out of 2                          |



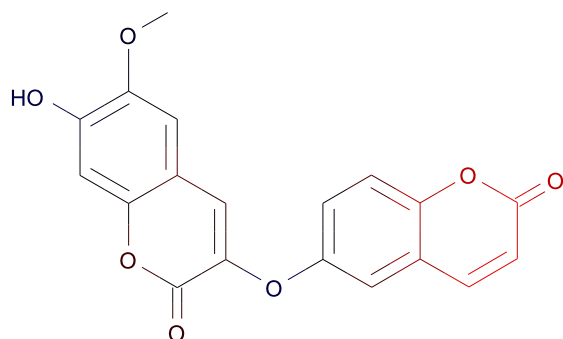C<sub>19</sub>H<sub>12</sub>O<sub>7</sub>

Molecular Weight: 352.29437

ALogP: 2.975

Rotatable Bonds: 3

Acceptors: 7

Donors: 1

## Model Prediction

Prediction: Carcinogen

Probability: 0.495

Enrichment: 1.48

Bayesian Score: 4.21

Mahalanobis Distance: 13.1

Mahalanobis Distance p-value: 0.00122

Prediction: Positive if the Bayesian score is above the estimated best cutoff value from minimizing the false positive and false negative rate.

Probability: The estimated probability that the sample is in the positive category. This assumes that the Bayesian score follows a normal distribution and is different from the prediction using a cutoff.

Enrichment: An estimate of enrichment, that is, the increased likelihood (versus random) of this sample being in the category.

Bayesian Score: The standard Laplacian-modified Bayesian score.

Mahalanobis Distance: The Mahalanobis distance (MD) is the distance to the center of the training data. The larger the MD, the less trustworthy the prediction.

Mahalanobis Distance p-value: The p-value gives the fraction of training data with an MD greater than or equal to the one for the given sample, assuming normally distributed data. The smaller the p-value, the less trustworthy the prediction. For highly non-normal X properties (e.g., fingerprints), the MD p-value is wildly inaccurate.

## Structural Similar Compounds

| Name               | Prazocin                                                            | Griseofulvin                                                        | Terazosin                                                           |
|--------------------|---------------------------------------------------------------------|---------------------------------------------------------------------|---------------------------------------------------------------------|
| Structure          |                                                                     |                                                                     |                                                                     |
| Actual Endpoint    | Non-Carcinogen                                                      | Carcinogen                                                          | Carcinogen                                                          |
| Predicted Endpoint | Non-Carcinogen                                                      | Carcinogen                                                          | Carcinogen                                                          |
| Distance           | 0.562                                                               | 0.624                                                               | 0.642                                                               |
| Reference          | US FDA (Centre for Drug Eval.& Res./Off. Testing & Res.) Sept. 1997 | US FDA (Centre for Drug Eval.& Res./Off. Testing & Res.) Sept. 1997 | US FDA (Centre for Drug Eval.& Res./Off. Testing & Res.) Sept. 1997 |

## Model Applicability

Unknown features are fingerprint features in the query molecule, but not found or appearing too infrequently in the training set.

1. All properties and OPS components are within expected ranges.

## Feature Contribution

### Top features for positive contribution

| Fingerprint | Bit/Smiles | Feature Structure                     | Score | Carcinogen in training set |
|-------------|------------|---------------------------------------|-------|----------------------------|
| SCFP_6      | 997923762  | <br><chem>[*]:[c]1[*]C=CC(=O)O</chem> | 0.603 | 2 out of 2                 |

| SCFP_6                                 | 516730200  | 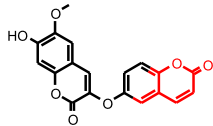<br><chem>[*]:[cH]:[c]1C=CC(=O)O[c]:1[*]</chem>                  | 0.603  | 2 out of 2                 |
|----------------------------------------|------------|-----------------------------------------------------------------------------------------------------------------------------------------------------|--------|----------------------------|
| SCFP_6                                 | 2109620068 | <br><chem>[*][c]1:[*]:[cH]:[c]2OC(=O)C=C[c]:2:[cH]:1</chem>      | 0.603  | 2 out of 2                 |
| Top Features for negative contribution |            |                                                                                                                                                     |        |                            |
| Fingerprint                            | Bit/Smiles | Feature Structure                                                                                                                                   | Score  | Carcinogen in training set |
| SCFP_6                                 | 2116304939 | <br><chem>[*]O[c]1:[cH]:[*]:[c]([*]):[cH]:[c]:1O</chem>          | -0.825 | 0 out of 4                 |
| SCFP_6                                 | -609499983 | <br><chem>[*]C(=[*])O[c]1:[cH]:[cH]:[*]:[c]([*]):[c]H]:1</chem> | -0.496 | 0 out of 2                 |
| SCFP_6                                 | 1264071919 | <br><chem>[*]C=C(\O[c]([cH]:[*]):[cH]:[*])C(=[*])[*]</chem>    | -0.496 | 0 out of 2                 |



# remdesivir

# TOPKAT\_Rat\_Male\_FDA\_None\_vs\_Carcinogen

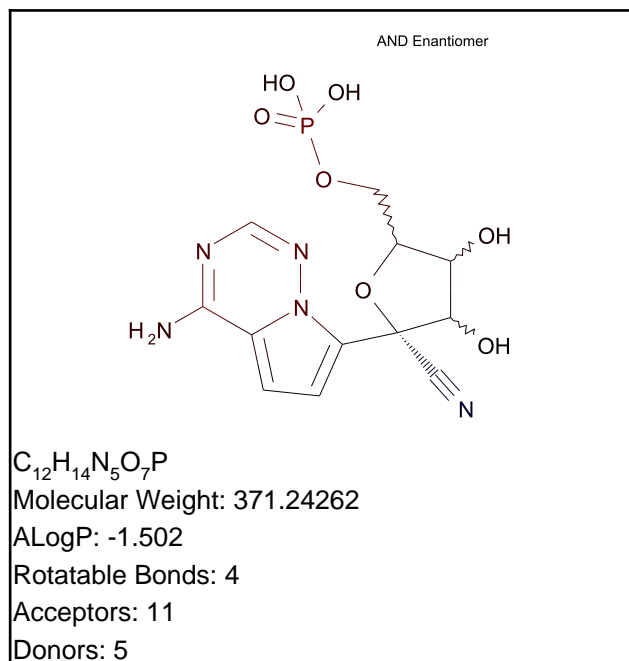

## Model Prediction

Prediction: Carcinogen

Probability: 0.481

Enrichment: 1.44

Bayesian Score: 3.82

Mahalanobis Distance: 14.1

Mahalanobis Distance p-value: 3.32e-005

Prediction: Positive if the Bayesian score is above the estimated best cutoff value from minimizing the false positive and false negative rate.

Probability: The estimated probability that the sample is in the positive category. This assumes that the Bayesian score follows a normal distribution and is different from the prediction using a cutoff.

Enrichment: An estimate of enrichment, that is, the increased likelihood (versus random) of this sample being in the category.

Bayesian Score: The standard Laplacian-modified Bayesian score.

Mahalanobis Distance: The Mahalanobis distance (MD) is the distance to the center of the training data. The larger the MD, the less trustworthy the prediction.

Mahalanobis Distance p-value: The p-value gives the fraction of training data with an MD greater than or equal to the one for the given sample, assuming normally distributed data. The smaller the p-value, the less trustworthy the prediction. For highly non-normal X properties (e.g., fingerprints), the MD p-value is wildly inaccurate.

## Structural Similar Compounds

| Name               | Streptozocin                                                                        | Famotidine                                                                          | Tetracycline                                                                        |
|--------------------|-------------------------------------------------------------------------------------|-------------------------------------------------------------------------------------|-------------------------------------------------------------------------------------|
| Structure          | 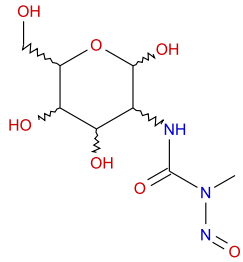 |  |  |
| Actual Endpoint    | Carcinogen                                                                          | Non-Carcinogen                                                                      | Non-Carcinogen                                                                      |
| Predicted Endpoint | Carcinogen                                                                          | Non-Carcinogen                                                                      | Non-Carcinogen                                                                      |
| Distance           | 0.789                                                                               | 0.850                                                                               | 0.856                                                                               |
| Reference          | US FDA (Centre for Drug Eval.& Res./Off. Testing & Res.) Sept. 1997                 | US FDA (Centre for Drug Eval.& Res./Off. Testing & Res.) Sept. 1997                 | US FDA (Centre for Drug Eval.& Res./Off. Testing & Res.) Sept. 1997                 |

## Model Applicability

Unknown features are fingerprint features in the query molecule, but not found or appearing too infrequently in the training set.

1. All properties and OPS components are within expected ranges.

## Feature Contribution

### Top features for positive contribution

| Fingerprint | Bit/Smiles  | Feature Structure                                                                                                                       | Score | Carcinogen in training set |
|-------------|-------------|-----------------------------------------------------------------------------------------------------------------------------------------|-------|----------------------------|
| SCFP_6      | -1029620989 | <p>AND Enantiomer</p> 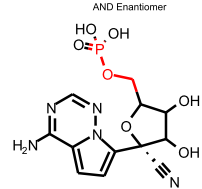 <p>[*]COP(=[*])([*])[*]</p> | 0.712 | 3 out of 3                 |

|                                        |             |                                                                                                                                                            |        |                            |
|----------------------------------------|-------------|------------------------------------------------------------------------------------------------------------------------------------------------------------|--------|----------------------------|
| SCFP_6                                 | 1245795878  | <p>AND Enantiomer</p> 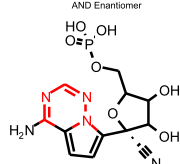 <p>[*][c]1:[*]:n(:[*]):n<br/>:[cH]:n:1</p>       | 0.603  | 2 out of 2                 |
| SCFP_6                                 | 149212520   | <p>AND Enantiomer</p>  <p>[*]:[cH]:n:n(:[*]):[*]<br/>]</p>              | 0.543  | 9 out of 15                |
| Top Features for negative contribution |             |                                                                                                                                                            |        |                            |
| Fingerprint                            | Bit/Smiles  | Feature Structure                                                                                                                                          | Score  | Carcinogen in training set |
| SCFP_6                                 | -1019297400 | <p>AND Enantiomer</p>  <p>[*]C([*])([*])C#N</p>                         | -0.674 | 0 out of 3                 |
| SCFP_6                                 | 194135988   | <p>AND Enantiomer</p>  <p>N[c]1:n:[cH]:[*]:n2:[*]:[*]:[cH]:[c]:1:2</p> | -0.278 | 0 out of 1                 |
| SCFP_6                                 | -424515134  | <p>AND Enantiomer</p>  <p>[*]C([*])O</p>                              | -0.157 | 30 out of 110              |

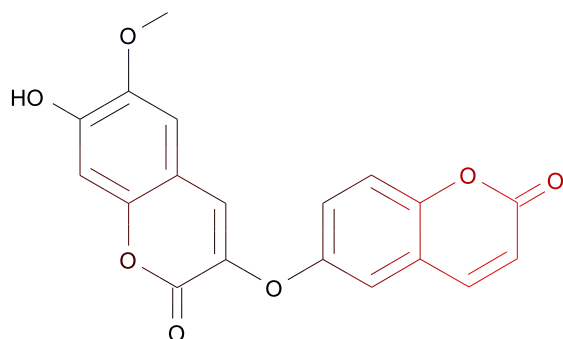C<sub>19</sub>H<sub>12</sub>O<sub>7</sub>

Molecular Weight: 352.29437

ALogP: 2.975

Rotatable Bonds: 3

Acceptors: 7

Donors: 1

## Model Prediction

Prediction: Multiple-Carcinogen

Probability: 0.588

Enrichment: 1.42

Bayesian Score: 5.23

Mahalanobis Distance: 19.4

Mahalanobis Distance p-value: 1.03e-009

Prediction: Positive if the Bayesian score is above the estimated best cutoff value from minimizing the false positive and false negative rate.

Probability: The estimated probability that the sample is in the positive category. This assumes that the Bayesian score follows a normal distribution and is different from the prediction using a cutoff.

Enrichment: An estimate of enrichment, that is, the increased likelihood (versus random) of this sample being in the category.

Bayesian Score: The standard Laplacian-modified Bayesian score.

Mahalanobis Distance: The Mahalanobis distance (MD) is the distance to the center of the training data. The larger the MD, the less trustworthy the prediction.

Mahalanobis Distance p-value: The p-value gives the fraction of training data with an MD greater than or equal to the one for the given sample, assuming normally distributed data. The smaller the p-value, the less trustworthy the prediction. For highly non-normal X properties (e.g., fingerprints), the MD p-value is wildly inaccurate.

## Structural Similar Compounds

| Name               | Terazosin                                                           | Griseofulvin                                                        | Isradipine                                                          |
|--------------------|---------------------------------------------------------------------|---------------------------------------------------------------------|---------------------------------------------------------------------|
| Structure          |                                                                     |                                                                     |                                                                     |
| Actual Endpoint    | Single-Carcinogen                                                   | Single-Carcinogen                                                   | Single-Carcinogen                                                   |
| Predicted Endpoint | Single-Carcinogen                                                   | Single-Carcinogen                                                   | Single-Carcinogen                                                   |
| Distance           | 0.669                                                               | 0.674                                                               | 0.681                                                               |
| Reference          | US FDA (Centre for Drug Eval.& Res./Off. Testing & Res.) Sept. 1997 | US FDA (Centre for Drug Eval.& Res./Off. Testing & Res.) Sept. 1997 | US FDA (Centre for Drug Eval.& Res./Off. Testing & Res.) Sept. 1997 |

## Model Applicability

Unknown features are fingerprint features in the query molecule, but not found or appearing too infrequently in the training set.

1. All properties and OPS components are within expected ranges.

## Feature Contribution

### Top features for positive contribution

| Fingerprint | Bit/Smiles | Feature Structure                                        | Score | Multiple-Carcinogen in training set |
|-------------|------------|----------------------------------------------------------|-------|-------------------------------------|
| SCFP_8      | 1977229858 | <br><chem>[*]=C1[*][c]([*]):[c]([*]):[c]([*])C=C1</chem> | 0.553 | 2 out of 2                          |

|                                        |            |                                                                                                                                                               |        |                                     |
|----------------------------------------|------------|---------------------------------------------------------------------------------------------------------------------------------------------------------------|--------|-------------------------------------|
| SCFP_8                                 | 966282057  | 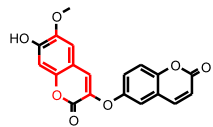<br><chem>[*]C1=C[c]2:[cH]:[c](<br/> [*]):[*]:[cH]:[c]:2O<br/> [*]1</chem> | 0.553  | 2 out of 2                          |
| SCFP_8                                 | -392286499 | <br><chem>[*]C1=[*][c](:[*]):[c<br/> ](OC1=O):[cH]:[*]</chem>              | 0.553  | 2 out of 2                          |
| Top Features for negative contribution |            |                                                                                                                                                               |        |                                     |
| Fingerprint                            | Bit/Smiles | Feature Structure                                                                                                                                             | Score  | Multiple-Carcinogen in training set |
| SCFP_8                                 | 1132907712 | <br><chem>[*]OC(=O)C(=[*])[*]</chem>                                       | -0.58  | 2 out of 12                         |
| SCFP_8                                 | 136239834  | <br><chem>[*]OC</chem>                                                   | -0.358 | 3 out of 13                         |
| SCFP_8                                 | 616576836  | <br><chem>[*]O/C(=C[*])\C(=[*]<br/> )[*]</chem>                          | -0.31  | 0 out of 1                          |



# remdesivir

# TOPKAT\_Rat\_Male\_FDA\_Single\_vs\_Multiple

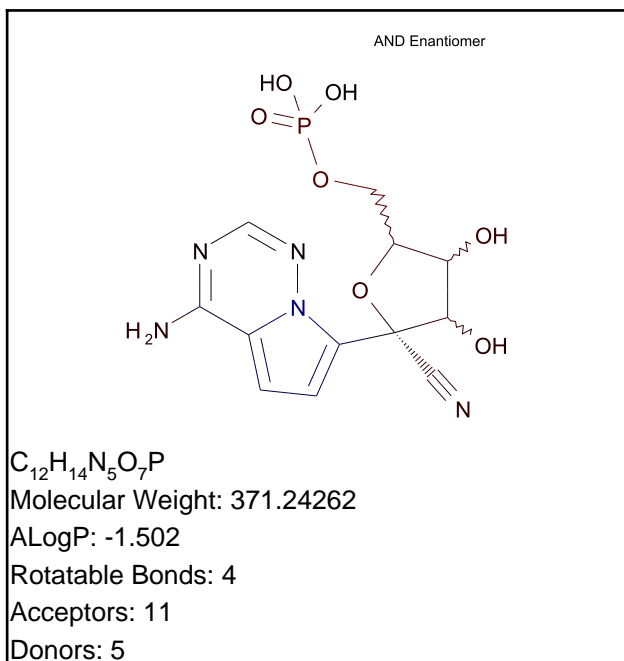

## Model Prediction

**Prediction: Multiple-Carcinogen**

Probability: 0.556

Enrichment: 1.34

Bayesian Score: 3.52

Mahalanobis Distance: 14

Mahalanobis Distance p-value: 8.72e-005

Prediction: Positive if the Bayesian score is above the estimated best cutoff value from minimizing the false positive and false negative rate.

Probability: The estimated probability that the sample is in the positive category. This assumes that the Bayesian score follows a normal distribution and is different from the prediction using a cutoff.

Enrichment: An estimate of enrichment, that is, the increased likelihood (versus random) of this sample being in the category.

Bayesian Score: The standard Laplacian-modified Bayesian score.

Mahalanobis Distance: The Mahalanobis distance (MD) is the distance to the center of the training data. The larger the MD, the less trustworthy the prediction.

Mahalanobis Distance p-value: The p-value gives the fraction of training data with an MD greater than or equal to the one for the given sample, assuming normally distributed data. The smaller the p-value, the less trustworthy the prediction. For highly non-normal X properties (e.g., fingerprints), the MD p-value is wildly inaccurate.

## Structural Similar Compounds

| Name               | Streptozocin                                                                        | Minocycline                                                                         | Ribavirin                                                                           |
|--------------------|-------------------------------------------------------------------------------------|-------------------------------------------------------------------------------------|-------------------------------------------------------------------------------------|
| Structure          | 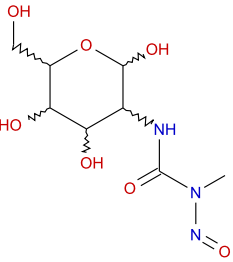 |  |  |
| Actual Endpoint    | Multiple-Carcinogen                                                                 | Single-Carcinogen                                                                   | Multiple-Carcinogen                                                                 |
| Predicted Endpoint | Multiple-Carcinogen                                                                 | Single-Carcinogen                                                                   | Multiple-Carcinogen                                                                 |
| Distance           | 0.817                                                                               | 0.908                                                                               | 0.929                                                                               |
| Reference          | US FDA (Centre for Drug Eval.& Res./Off. Testing & Res.) Sept. 1997                 | US FDA (Centre for Drug Eval.& Res./Off. Testing & Res.) Sept. 1997                 | US FDA (Centre for Drug Eval.& Res./Off. Testing & Res.) Sept. 1997                 |

## Model Applicability

Unknown features are fingerprint features in the query molecule, but not found or appearing too infrequently in the training set.

1. Num\_H\_Acceptors out of range. Value: 11. Training min, max, mean, SD: 0, 9, 3.8906, 2.196.

## Feature Contribution

### Top features for positive contribution

| Fingerprint | Bit/Smiles  | Feature Structure                                                                                             | Score | Multiple-Carcinogen in training set |
|-------------|-------------|---------------------------------------------------------------------------------------------------------------|-------|-------------------------------------|
| SCFP_8      | -1029620989 | 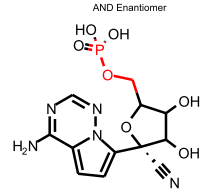<br>[*]COP(=[*])([*])[*] | 0.649 | 3 out of 3                          |

|                                        |             |                                                                                                                                                                   |        |                                     |
|----------------------------------------|-------------|-------------------------------------------------------------------------------------------------------------------------------------------------------------------|--------|-------------------------------------|
| SCFP_8                                 | 2           | <p>AND Enantiomer</p> 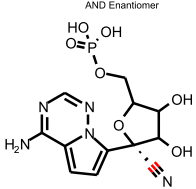 <p>[*]C#[*]</p>                                         | 0.584  | 6 out of 8                          |
| SCFP_8                                 | -553385769  | <p>AND Enantiomer</p>  <p>[*]C#N</p>                                           | 0.553  | 2 out of 2                          |
| Top Features for negative contribution |             |                                                                                                                                                                   |        |                                     |
| Fingerprint                            | Bit/Smiles  | Feature Structure                                                                                                                                                 | Score  | Multiple-Carcinogen in training set |
| SCFP_8                                 | -1381862798 | <p>AND Enantiomer</p>  <p>[*][c](:[*]):[c]1:[cH]:[cH]:[c]([*]):n:1:[*]</p>     | -0.572 | 1 out of 7                          |
| SCFP_8                                 | 1245795878  | <p>AND Enantiomer</p>  <p>[*][c]1:[*]:n(:[*]):n:[cH]:n:1</p>                 | -0.546 | 0 out of 2                          |
| SCFP_8                                 | -1375522316 | <p>AND Enantiomer</p>  <p>[*]C([*])([*])[c]1:[cH]:[cH]:[c](:[*]):n:1:[*]</p> | -0.546 | 0 out of 2                          |





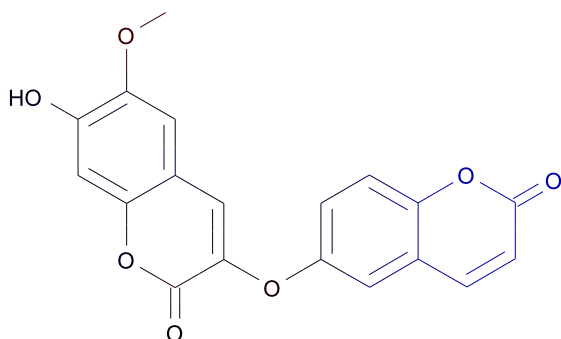C<sub>19</sub>H<sub>12</sub>O<sub>7</sub>

Molecular Weight: 352.29437

ALogP: 2.975

Rotatable Bonds: 3

Acceptors: 7

Donors: 1

## Model Prediction

Prediction: Mild

Probability: 0.174

Enrichment: 0.471

Bayesian Score: -5.89

Mahalanobis Distance: 9.49

Mahalanobis Distance p-value: 0.11

Prediction: Positive if the Bayesian score is above the estimated best cutoff value from minimizing the false positive and false negative rate.

Probability: The estimated probability that the sample is in the positive category. This assumes that the Bayesian score follows a normal distribution and is different from the prediction using a cutoff.

Enrichment: An estimate of enrichment, that is, the increased likelihood (versus random) of this sample being in the category.

Bayesian Score: The standard Laplacian-modified Bayesian score.

Mahalanobis Distance: The Mahalanobis distance (MD) is the distance to the center of the training data. The larger the MD, the less trustworthy the prediction.

Mahalanobis Distance p-value: The p-value gives the fraction of training data with an MD greater than or equal to the one for the given sample, assuming normally distributed data. The smaller the p-value, the less trustworthy the prediction. For highly non-normal X properties (e.g., fingerprints), the MD p-value is wildly inaccurate.

## Structural Similar Compounds

| Name               | Pregna-1,4-diene-3,20-dione, 21-(acetyloxy)-11-hydroxy-6-methyl-17- (1-oxopropoxy)-, (6- $\alpha$ ,11- $\beta$ )-                                                                | 1,4-Pentadien-3-one, 1,5-bis(p-azidophenyl)-                                                                                                      | Phosphorothioic acid, O,O-dimethyl O-(3,5,6-trichloro-2-pyridyl) ester                                                                               |
|--------------------|----------------------------------------------------------------------------------------------------------------------------------------------------------------------------------|---------------------------------------------------------------------------------------------------------------------------------------------------|------------------------------------------------------------------------------------------------------------------------------------------------------|
| Structure          |                                                                                                                                                                                  |                                                                                                                                                   |                                                                                                                                                      |
| Actual Endpoint    | Mild                                                                                                                                                                             | Mild                                                                                                                                              | Mild                                                                                                                                                 |
| Predicted Endpoint | Mild                                                                                                                                                                             | Mild                                                                                                                                              | Mild                                                                                                                                                 |
| Distance           | 0.752                                                                                                                                                                            | 0.767                                                                                                                                             | 0.774                                                                                                                                                |
| Reference          | YACHDS Yakuri to Chiryo. Pharmacology and Therapeutics. (Raifu Saiensu Shup pan K.K., 2-5-13, Yaesu, Chuo-ku, Tokyo 104, Japan) V.1-1972- Volume(issue) /page/year: 19,3103,1991 | 85JCAE "Prehled Prumyslove Toxikologie; Organické Latky," Marhold, J., Prague, Czechoslovakia, Avicenum, 1986 Volume(issue)/page/year: -,733,1986 | TXAPA9 Toxicology and Applied Pharmacology. (Academic Press, Inc., 1 E. First St., Duluth, MN 55802) V.1- 1959- Volume(issue)/page/year: 21,369,1972 |

## Model Applicability

Unknown features are fingerprint features in the query molecule, but not found or appearing too infrequently in the training set.

1. All properties and OPS components are within expected ranges.

## Feature Contribution

### Top features for positive contribution

| Fingerprint | Bit/Smiles | Feature Structure | Score | Moderate_Severe in training set |
|-------------|------------|-------------------|-------|---------------------------------|
|-------------|------------|-------------------|-------|---------------------------------|

|         |             |                                                                                                                                                    |       |              |
|---------|-------------|----------------------------------------------------------------------------------------------------------------------------------------------------|-------|--------------|
| FCFP_12 | -1977641857 | 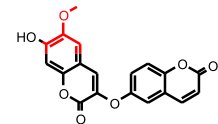<br><chem>[*][c]([*]):[c](OC):[cH]:[*]</chem>                   | 0.416 | 18 out of 32 |
| FCFP_12 | 136627117   | <br><chem>[*]OC</chem>                                          | 0.361 | 47 out of 90 |
| FCFP_12 | -1099193755 | <br><chem>[*][c]1:[*]:[cH]:[c]2C=[*]C(=[*])O[c]:2:[cH]:1</chem> | 0.343 | 6 out of 11  |

### Top Features for negative contribution

| Fingerprint | Bit/Smiles | Feature Structure                                                                                                                                  | Score  | Moderate_Severe in training set |
|-------------|------------|----------------------------------------------------------------------------------------------------------------------------------------------------|--------|---------------------------------|
| FCFP_12     | -395337223 | 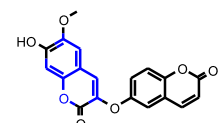<br><chem>[*]C1=C[c]2:[cH]:[c]([*]):[*]:[cH]:[c]:2O[*]1</chem> | -0.733 | 0 out of 3                      |
| FCFP_12     | 2140586096 | <br><chem>[*][c]1:[*]:[cH]:[c]2OC(=O)C=C[c]:2:[cH]:1</chem>   | -0.543 | 0 out of 2                      |

|         |            |                                                                                                                                     |        |            |
|---------|------------|-------------------------------------------------------------------------------------------------------------------------------------|--------|------------|
| FCFP_12 | -938580853 | 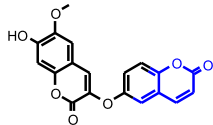<br><chem>*[cH]:[c]:[c]1C=CC(=O)O[c]:1[*]</chem> | -0.543 | 0 out of 2 |
|---------|------------|-------------------------------------------------------------------------------------------------------------------------------------|--------|------------|

# remdesivir

# TOPKAT\_Skin\_Irritancy\_Mild\_vs\_Moderate\_Severe

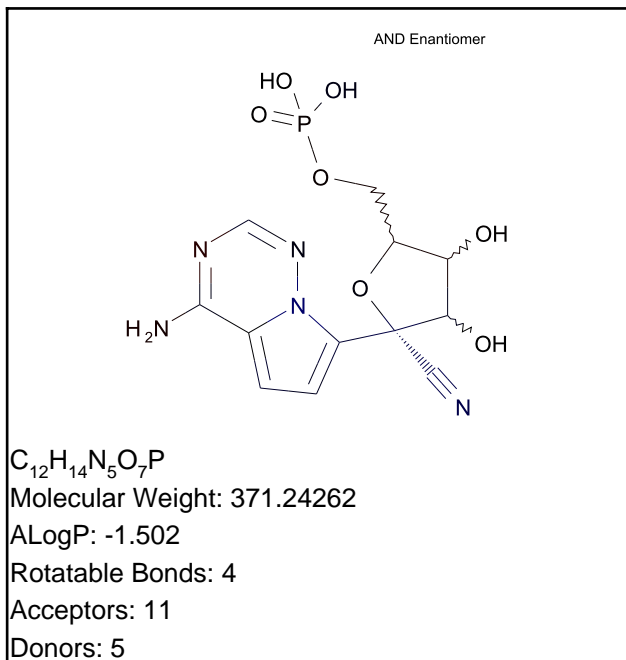

## Model Prediction

Prediction: Mild

Probability: 0.0911

Enrichment: 0.247

Bayesian Score: -8.73

Mahalanobis Distance: 13.5

Mahalanobis Distance p-value: 1.21e-009

Prediction: Positive if the Bayesian score is above the estimated best cutoff value from minimizing the false positive and false negative rate.

Probability: The estimated probability that the sample is in the positive category. This assumes that the Bayesian score follows a normal distribution and is different from the prediction using a cutoff.

Enrichment: An estimate of enrichment, that is, the increased likelihood (versus random) of this sample being in the category.

Bayesian Score: The standard Laplacian-modified Bayesian score.

Mahalanobis Distance: The Mahalanobis distance (MD) is the distance to the center of the training data. The larger the MD, the less trustworthy the prediction.

Mahalanobis Distance p-value: The p-value gives the fraction of training data with an MD greater than or equal to the one for the given sample, assuming normally distributed data. The smaller the p-value, the less trustworthy the prediction. For highly non-normal X properties (e.g., fingerprints), the MD p-value is wildly inaccurate.

## Structural Similar Compounds

| Name               | 1,3,6-Naphthalenetrisulfonic acid, 7-amino-                                                                                                           | 2,7-Anthracenedisulfonic acid, 9,10-dihydro-4,5-diamino-9,10-dioxo-1-hydroxy-, disodium salt                                                                                                                          | 1,5-Naphthalenedisulfonic acid, 2-amino-                                                                                                              |
|--------------------|-------------------------------------------------------------------------------------------------------------------------------------------------------|-----------------------------------------------------------------------------------------------------------------------------------------------------------------------------------------------------------------------|-------------------------------------------------------------------------------------------------------------------------------------------------------|
| Structure          |                                                                                                                                                       |                                                                                                                                                                                                                       |                                                                                                                                                       |
| Actual Endpoint    | Mild                                                                                                                                                  | Mild                                                                                                                                                                                                                  | Mild                                                                                                                                                  |
| Predicted Endpoint | Mild                                                                                                                                                  | Mild                                                                                                                                                                                                                  | Mild                                                                                                                                                  |
| Distance           | 0.759                                                                                                                                                 | 1.033                                                                                                                                                                                                                 | 1.137                                                                                                                                                 |
| Reference          | 85JCAE "Prehled Prumyslove Toxikologie; Organicke Latky," Marhold, J., Prague, Czechoslovakia, Avicenum, 1986<br>Volume(issue)/page/year: -,1058,1986 | 28ZPAK "Sbornik Vysledku Toxikologickeho Vysetreni Latek A Pripravku," Marhol d, J.V., Institut Pro Vychovu Vedoucicn Pracovniku Chemickeho Prumyclu Praha, Cz echoslovakia, 1972<br>Volume(issue)/page/year: -,239,1 | 85JCAE "Prehled Prumyslove Toxikologie; Organicke Latky," Marhold, J., Prague, Czechoslovakia, Avicenum, 1986<br>Volume(issue)/page/year: -,1058,1986 |

## Model Applicability

Unknown features are fingerprint features in the query molecule, but not found or appearing too infrequently in the training set.

1. All properties and OPS components are within expected ranges.
2. Unknown FCFP\_2 feature: 472180098: [\*]OP(=O)(O)O
3. Unknown FCFP\_2 feature: -332197802: [\*][c]1:[\*]:[\*]:[c]([\*]):n:1:n:[\*]

## Feature Contribution

### Top features for positive contribution

| Fingerprint | Bit/Smiles | Feature Structure | Score | Moderate_Severe in training set |
|-------------|------------|-------------------|-------|---------------------------------|
|-------------|------------|-------------------|-------|---------------------------------|

|                                        |             |                                                                                                                                                    |        |                                    |
|----------------------------------------|-------------|----------------------------------------------------------------------------------------------------------------------------------------------------|--------|------------------------------------|
| FCFP_12                                | 76292238    | <p>AND Enantiomer</p> 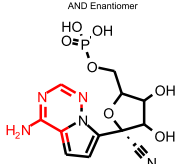 <p>[*]:[c]1:[*]:n:[cH]:n<br/>:[c]:1N</p> | 0.385  | 1 out of 1                         |
| FCFP_12                                | -1151884458 | <p>AND Enantiomer</p>  <p>[*]:n:[c](N):[c](:[*]<br/>):[*]</p>   | 0.385  | 1 out of 1                         |
| FCFP_12                                | -124685461  | <p>AND Enantiomer</p>  <p>[*]:n:[cH]:n:[*]</p>                  | 0.206  | 2 out of 4                         |
| Top Features for negative contribution |             |                                                                                                                                                    |        |                                    |
| Fingerprint                            | Bit/Smiles  | Feature Structure                                                                                                                                  | Score  | Moderate_Severe<br>in training set |
| FCFP_12                                | 4427049     | <p>AND Enantiomer</p>  <p>[*]:[cH]:n:n(:[*]):[*]<br/>]</p>     | -0.893 | 0 out of 4                         |
| FCFP_12                                | -1277879912 | <p>AND Enantiomer</p>  <p>[*]C([*])([*])C#N</p>               | -0.548 | 5 out of 26                        |

|         |            |                                                                                                                                                                                  |        |            |
|---------|------------|----------------------------------------------------------------------------------------------------------------------------------------------------------------------------------|--------|------------|
| FCFP_12 | -836603894 | <p>AND Enantiomer</p> 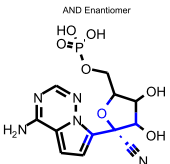 <p><chem>[*]C1[*][*]O[C@H]1(C#N)[C@@H](O)[C@H](O)OP(=O)(O)O</chem></p> | -0.543 | 0 out of 2 |
|---------|------------|----------------------------------------------------------------------------------------------------------------------------------------------------------------------------------|--------|------------|

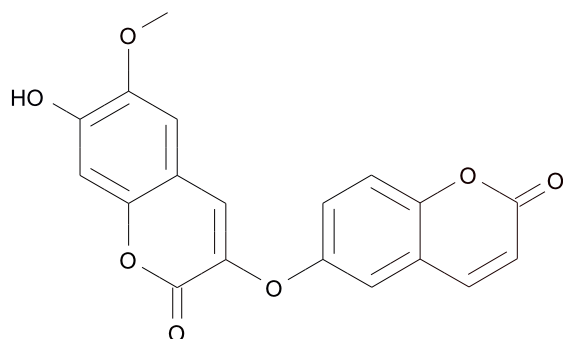C<sub>19</sub>H<sub>12</sub>O<sub>7</sub>

Molecular Weight: 352.29437

ALogP: 2.975

Rotatable Bonds: 3

Acceptors: 7

Donors: 1

## Model Prediction

Prediction: Irritant

Probability: 0.995

Enrichment: 1.08

Bayesian Score: -0.0259

Mahalanobis Distance: 9.01

Mahalanobis Distance p-value: 0.416

Prediction: Positive if the Bayesian score is above the estimated best cutoff value from minimizing the false positive and false negative rate.

Probability: The estimated probability that the sample is in the positive category. This assumes that the Bayesian score follows a normal distribution and is different from the prediction using a cutoff.

Enrichment: An estimate of enrichment, that is, the increased likelihood (versus random) of this sample being in the category.

Bayesian Score: The standard Laplacian-modified Bayesian score.

Mahalanobis Distance: The Mahalanobis distance (MD) is the distance to the center of the training data. The larger the MD, the less trustworthy the prediction.

Mahalanobis Distance p-value: The p-value gives the fraction of training data with an MD greater than or equal to the one for the given sample, assuming normally distributed data. The smaller the p-value, the less trustworthy the prediction. For highly non-normal X properties (e.g., fingerprints), the MD p-value is wildly inaccurate.

## Structural Similar Compounds

| Name               | Pregna-1,4-diene-3,20-dione, 21-(acetyloxy)-11-hydroxy-6-methyl-17- (1-oxopropoxy)-, (6- $\alpha$ ,11- $\beta$ )-                                                                | 1,4-Pentadien-3-one, 1,5-bis(p-azidophenyl)-                                                                                                      | Phosphorothioic acid, O,O-dimethyl O-(3,5,6-trichloro-2-pyridyl) ester                                                                               |
|--------------------|----------------------------------------------------------------------------------------------------------------------------------------------------------------------------------|---------------------------------------------------------------------------------------------------------------------------------------------------|------------------------------------------------------------------------------------------------------------------------------------------------------|
| Structure          |                                                                                                                                                                                  |                                                                                                                                                   |                                                                                                                                                      |
| Actual Endpoint    | Irritant                                                                                                                                                                         | Irritant                                                                                                                                          | Irritant                                                                                                                                             |
| Predicted Endpoint | Irritant                                                                                                                                                                         | Irritant                                                                                                                                          | Irritant                                                                                                                                             |
| Distance           | 0.760                                                                                                                                                                            | 0.766                                                                                                                                             | 0.777                                                                                                                                                |
| Reference          | YACHDS Yakuri to Chiryo. Pharmacology and Therapeutics. (Raifu Saiensu Shup pan K.K., 2-5-13, Yaesu, Chuo-ku, Tokyo 104, Japan) V.1-1972- Volume(issue) /page/year: 19,3103,1991 | 85JCAE "Prehled Prumyslove Toxikologie; Organicke Latky," Marhold, J., Prague, Czechoslovakia, Avicenum, 1986 Volume(issue)/page/year: -,733,1986 | TXAPA9 Toxicology and Applied Pharmacology. (Academic Press, Inc., 1 E. First St., Duluth, MN 55802) V.1- 1959- Volume(issue)/page/year: 21,369,1972 |

## Model Applicability

Unknown features are fingerprint features in the query molecule, but not found or appearing too infrequently in the training set.

1. All properties and OPS components are within expected ranges.

## Feature Contribution

| Top features for positive contribution |            |                   |       |                          |
|----------------------------------------|------------|-------------------|-------|--------------------------|
| Fingerprint                            | Bit/Smiles | Feature Structure | Score | Irritant in training set |
|                                        |            |                   |       |                          |

| FCFP_12                                | -146015125  | 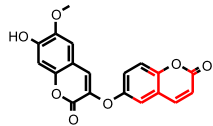<br><chem>[*]=C1[*][c]([*]):[c]([*]):[cH]:[*])C=C1</chem>            | 0.085  | 24 out of 24             |
|----------------------------------------|-------------|---------------------------------------------------------------------------------------------------------------------------------------------------------|--------|--------------------------|
| FCFP_12                                | -1979033238 | <br><chem>[*]C1=[*][c]([*]):[c]([*]):[cH]:[*](OC1=O):[cH]:[*]</chem> | 0.0841 | 19 out of 19             |
| FCFP_12                                | -2132692875 | <br><chem>[*]:[c]1:[*]OC(=O)C=C1</chem>                              | 0.0756 | 6 out of 6               |
| Top Features for negative contribution |             |                                                                                                                                                         |        |                          |
| Fingerprint                            | Bit/Smiles  | Feature Structure                                                                                                                                       | Score  | Irritant in training set |
| FCFP_12                                | 7           | <br><chem>[*]O</chem>                                              | -0.118 | 104 out of 128           |
| FCFP_12                                | 74595001    | <br><chem>[*][c]([*]):[c]([*]):[cH]:[*]</chem>                     | -0.11  | 54 out of 66             |



FCFP\_12

-549108873

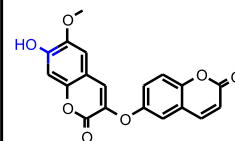

-0.11

54 out of 66

[\*]:[c](:[\*])O

# remdesivir

# TOPKAT\_Skin\_Irritancy\_None\_vs\_Irritant

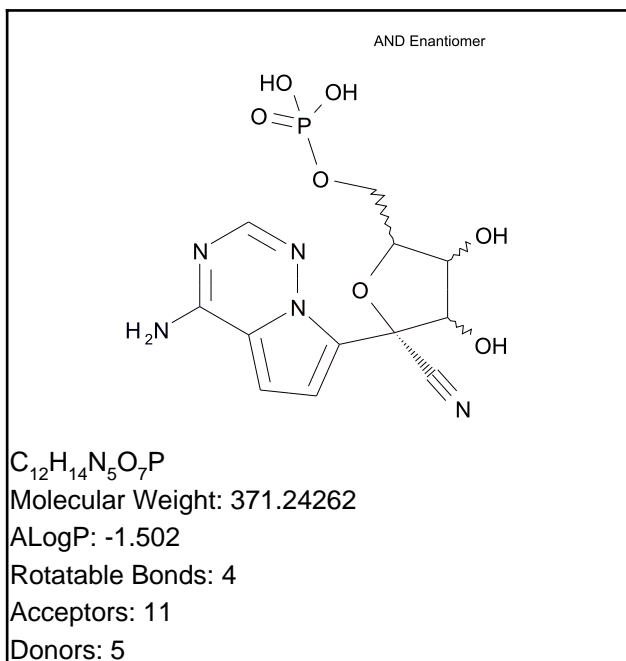

## Model Prediction

Prediction: Irritant

Probability: 0.976

Enrichment: 1.06

Bayesian Score: -0.492

Mahalanobis Distance: 13.2

Mahalanobis Distance p-value: 3.18e-008

Prediction: Positive if the Bayesian score is above the estimated best cutoff value from minimizing the false positive and false negative rate.

Probability: The estimated probability that the sample is in the positive category. This assumes that the Bayesian score follows a normal distribution and is different from the prediction using a cutoff.

Enrichment: An estimate of enrichment, that is, the increased likelihood (versus random) of this sample being in the category. Bayesian Score: The standard Laplacian-modified Bayesian score.

Mahalanobis Distance: The Mahalanobis distance (MD) is the distance to the center of the training data. The larger the MD, the less trustworthy the prediction.

Mahalanobis Distance p-value: The p-value gives the fraction of training data with an MD greater than or equal to the one for the given sample, assuming normally distributed data. The smaller the p-value, the less trustworthy the prediction. For highly non-normal X properties (e.g., fingerprints), the MD p-value is wildly inaccurate.

## Structural Similar Compounds

| Name               | 1,3,6-Naphthalenetrisulfonic acid, 7-amino-                                                                                                         | 2,2'-Benzidine disulfonic acid                                                      | 2,7-Anthracenedisulfonic acid, 9,10-dihydro-4,5-diamino-9,10-dioxo- 1-hydroxy-, disodium salt                                                                                                                       |
|--------------------|-----------------------------------------------------------------------------------------------------------------------------------------------------|-------------------------------------------------------------------------------------|---------------------------------------------------------------------------------------------------------------------------------------------------------------------------------------------------------------------|
| Structure          | 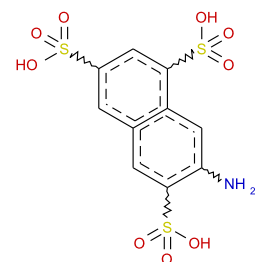                                                                 |  |                                                                                                                                  |
| Actual Endpoint    | Irritant                                                                                                                                            | Non-Irritant                                                                        | Irritant                                                                                                                                                                                                            |
| Predicted Endpoint | Non-Irritant                                                                                                                                        | Non-Irritant                                                                        | Non-Irritant                                                                                                                                                                                                        |
| Distance           | 0.755                                                                                                                                               | 0.896                                                                               | 1.025                                                                                                                                                                                                               |
| Reference          | 85JCAE "Prehled Prumyslove Toxikologie; Organické Latky," Marhold, J., Prague , Czechoslovakia, Avicenum, 1986 Volume(issue)/page/year: -,1058,1986 | 28ZPAK -,191,72                                                                     | 28ZPAK "Sbornik Vysledku Toxikologickeho Vysvetreni Latek A Pripravku," Marhol d, J.V., Institut Pro Vychovu Vedoucicn Pracovniku Chemickeho Prumyclu Praha, Cz echoslovakia, 1972 Volume(issue)/page/year: -,239,1 |

## Model Applicability

Unknown features are fingerprint features in the query molecule, but not found or appearing too infrequently in the training set.

1. All properties and OPS components are within expected ranges.
2. Unknown FCFP\_2 feature: 472180098: [\*]OP(=O)(O)O
3. Unknown FCFP\_2 feature: -332197802: [\*][c]1:[\*]:[\*]:[c]([\*]):n:1:n:[\*]

## Feature Contribution

### Top features for positive contribution

| Fingerprint | Bit/Smiles | Feature Structure | Score | Irritant in training set |
|-------------|------------|-------------------|-------|--------------------------|
|             |            |                   |       |                          |

|                                        |             |                                                                                                                                                                |         |                          |
|----------------------------------------|-------------|----------------------------------------------------------------------------------------------------------------------------------------------------------------|---------|--------------------------|
| FCFP_12                                | 654335567   | <p>AND Enantiomer</p> 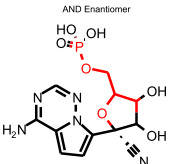 <p>[*]C1[*]([*])OC1COP(=O)(O)O</p>                   | 0.0856  | 29 out of 29             |
| FCFP_12                                | -1539132615 | <p>AND Enantiomer</p>  <p>[*]C([*])([*])[c]1:[cH]:[*]:n:1:[*]</p>           | 0.0795  | 9 out of 9               |
| FCFP_12                                | -1280036918 | <p>AND Enantiomer</p>  <p>[*]C([*])([*])[c]1:[cH]:[cH]:[c]([*]):n:1:[*]</p> | 0.0772  | 7 out of 7               |
| Top Features for negative contribution |             |                                                                                                                                                                |         |                          |
| Fingerprint                            | Bit/Smiles  | Feature Structure                                                                                                                                              | Score   | Irritant in training set |
| FCFP_12                                | 1069584379  | <p>AND Enantiomer</p>  <p>[*]:[c]([*])N</p>                                | -0.439  | 38 out of 65             |
| FCFP_12                                | 1618154665  | <p>AND Enantiomer</p>  <p>[*][c]([*]):[cH]:[c]([*]):[*]</p>               | -0.0845 | 412 out of 490           |

|         |    |                                                                                                                                   |         |                |
|---------|----|-----------------------------------------------------------------------------------------------------------------------------------|---------|----------------|
| FCFP_12 | 16 | <p>AND Enantiomer</p> 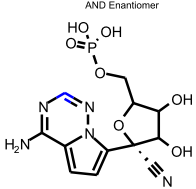 <p>[*][c](:[*]):[*]</p> | -0.0843 | 423 out of 503 |
|---------|----|-----------------------------------------------------------------------------------------------------------------------------------|---------|----------------|

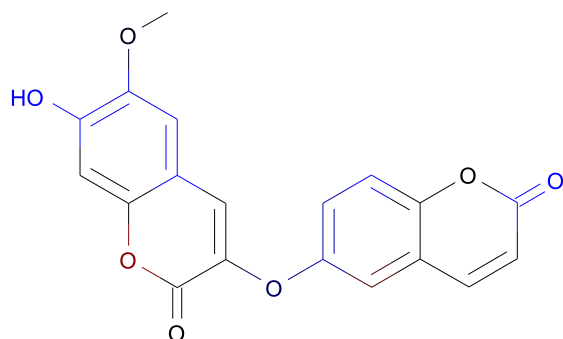C<sub>19</sub>H<sub>12</sub>O<sub>7</sub>

Molecular Weight: 352.29437

ALogP: 2.975

Rotatable Bonds: 3

Acceptors: 7

Donors: 1

## Model Prediction

Prediction: 101

Unit: mg/kg\_body\_weight/day

Mahalanobis Distance: 10.1

Mahalanobis Distance p-value: 0.0278

Mahalanobis Distance: The Mahalanobis distance (MD) is a generalization of the Euclidean distance that accounts for correlations among the X properties. It is calculated as the distance to the center of the training data. The larger the MD, the less trustworthy the prediction.

Mahalanobis Distance p-value: The p-value gives the fraction of training data with an MD greater than or equal to the one for the given sample, assuming normally distributed data. The smaller the p-value, the less trustworthy the prediction. For highly non-normal X properties (e.g., fingerprints), the MD p-value is wildly inaccurate.

## Structural Similar Compounds

| Name                        | Sterigmatocystin s | C.I. pigment red 3 | Griseofulvin s |
|-----------------------------|--------------------|--------------------|----------------|
| Structure                   |                    |                    |                |
| Actual Endpoint (-log C)    | 5.55284            | 0.937339           | 4.40761        |
| Predicted Endpoint (-log C) | 3.6442             | 3.17837            | 3.87261        |
| Distance                    | 0.612              | 0.656              | 0.703          |
| Reference                   | CPDB               | CPDB               | CPDB           |

## Model Applicability

Unknown features are fingerprint features in the query molecule, but not found or appearing too infrequently in the training set.

1. All properties and OPS components are within expected ranges.

## Feature Contribution

### Top features for positive contribution

| Fingerprint | Bit/Smiles | Feature Structure | Score |
|-------------|------------|-------------------|-------|
| ECFP_6      | 683445015  | <br>[*]O[*]       | 0.136 |

| ECFP_6                                 | -176455838 | 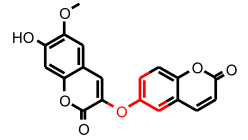<br><chem>[*]O[c]([cH]:[*]):[cH]:[*]</chem>  | 0.0818 |
|----------------------------------------|------------|---------------------------------------------------------------------------------------------------------------------------------|--------|
| ECFP_6                                 | 734603939  | <br><chem>[*]C</chem>                        | 0.0424 |
| Top Features for negative contribution |            |                                                                                                                                 |        |
| Fingerprint                            | Bit/Smiles | Feature Structure                                                                                                               | Score  |
| ECFP_6                                 | 2106656448 | <br><chem>[*]C(=O)[*]</chem>                 | -0.275 |
| ECFP_6                                 | 2019062761 | <br><chem>[*]:[c]([*])O</chem>             | -0.258 |
| ECFP_6                                 | 1996767644 | <br><chem>[*][c]([*]):[cH]:[cH]:[*]</chem> | -0.251 |



# remdesivir

# TOPKAT\_Carcinogenic\_Potency\_TD50\_Mouse

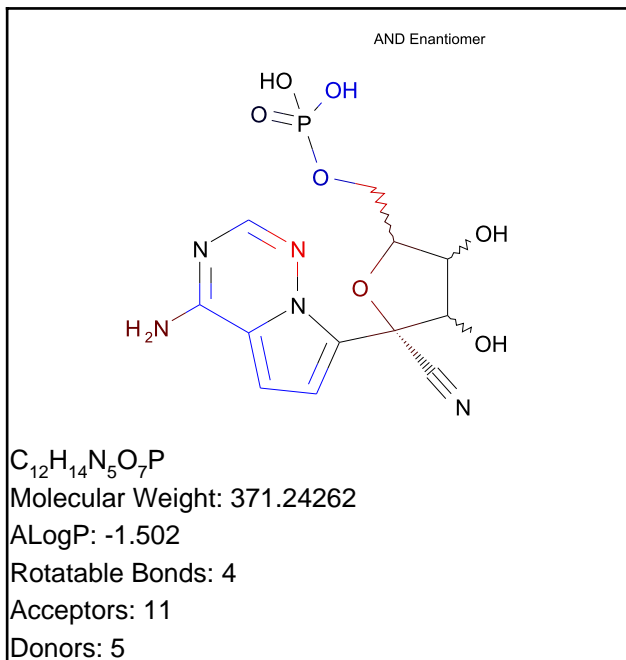

## Model Prediction

Prediction: 9.25

Unit: mg/kg\_body\_weight/day

Mahalanobis Distance: 14

Mahalanobis Distance p-value: 2.59e-010

Mahalanobis Distance: The Mahalanobis distance (MD) is a generalization of the Euclidean distance that accounts for correlations among the X properties. It is calculated as the distance to the center of the training data. The larger the MD, the less trustworthy the prediction.

Mahalanobis Distance p-value: The p-value gives the fraction of training data with an MD greater than or equal to the one for the given sample, assuming normally distributed data. The smaller the p-value, the less trustworthy the prediction. For highly non-normal X properties (e.g., fingerprints), the MD p-value is wildly inaccurate.

## Structural Similar Compounds

| Name                        | 377                                                                                 | (N-6)-(Methylnitroso)adenosine                                                      | 338                                                                                 |
|-----------------------------|-------------------------------------------------------------------------------------|-------------------------------------------------------------------------------------|-------------------------------------------------------------------------------------|
| Structure                   | 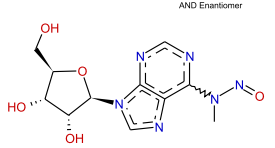 |  |  |
| Actual Endpoint (-log C)    | 4.22928                                                                             | 4.22928                                                                             | 4.39533                                                                             |
| Predicted Endpoint (-log C) | 5.36013                                                                             | 5.36013                                                                             | 4.31268                                                                             |
| Distance                    | 0.852                                                                               | 0.852                                                                               | 0.919                                                                               |
| Reference                   | CPDB                                                                                | CPDB                                                                                | CPDB                                                                                |

## Model Applicability

Unknown features are fingerprint features in the query molecule, but not found or appearing too infrequently in the training set.

1. All properties and OPS components are within expected ranges.
2. Unknown ECFP\_2 feature: 1126642748: [\*]OP(=O)(O)O
3. Unknown ECFP\_2 feature: 2024329577: [\*]P(=O)([\*])O
4. Unknown ECFP\_2 feature: -194719409: [\*]C1[\*]C([\*])([\*])O1
5. Unknown ECFP\_2 feature: 1258791451: [\*]C1[\*]O[C@]1(C#[\*])[c](:[\*]):[\*]
6. Unknown ECFP\_2 feature: -264833661: [\*]C([\*])([\*])C#N
7. Unknown ECFP\_2 feature: -1507082173: [\*][c]1:[\*]:[\*]:[c](:[\*]):n:1:n:[\*]
8. Unknown ECFP\_2 feature: -676555381: [\*]:[cH]:n:n(:[\*]):[\*]
9. Unknown ECFP\_2 feature: -66263742: [\*]C([\*])([\*])[c]1:[cH]:[\*]:[\*]:n:1:[\*]

## Feature Contribution

### Top features for positive contribution

| Fingerprint | Bit/Smiles | Feature Structure | Score |
|-------------|------------|-------------------|-------|
|             |            |                   |       |





|        |           |                                                                                                                               |       |
|--------|-----------|-------------------------------------------------------------------------------------------------------------------------------|-------|
| ECFP_6 | 182236392 | <p>AND Enantiomer</p> 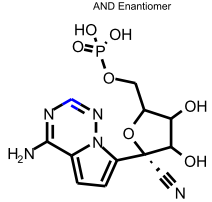 <p>[*]:[cH]:[*]</p> | 0.232 |
|--------|-----------|-------------------------------------------------------------------------------------------------------------------------------|-------|

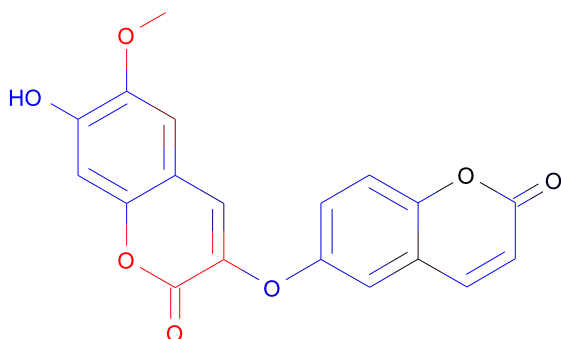C<sub>19</sub>H<sub>12</sub>O<sub>7</sub>

Molecular Weight: 352.29437

ALogP: 2.975

Rotatable Bonds: 3

Acceptors: 7

Donors: 1

## Model Prediction

Prediction: 7.88

Unit: mg/kg\_body\_weight/day

Mahalanobis Distance: 14.4

Mahalanobis Distance p-value: 2.26e-009

Mahalanobis Distance: The Mahalanobis distance (MD) is a generalization of the Euclidean distance that accounts for correlations among the X properties. It is calculated as the distance to the center of the training data. The larger the MD, the less trustworthy the prediction.

Mahalanobis Distance p-value: The p-value gives the fraction of training data with an MD greater than or equal to the one for the given sample, assuming normally distributed data. The smaller the p-value, the less trustworthy the prediction. For highly non-normal X properties (e.g., fingerprints), the MD p-value is wildly inaccurate.

## Structural Similar Compounds

| Name                        | 5,6-Dimethoxysterigmatocystin | Sterigmatocystin s | C.I. pigment red 3 |
|-----------------------------|-------------------------------|--------------------|--------------------|
| Structure                   |                               |                    |                    |
| Actual Endpoint (-log C)    | 6.02361                       | 6.32908            | 2.41938            |
| Predicted Endpoint (-log C) | 4.98771                       | 4.10741            | 4.26375            |
| Distance                    | 0.555                         | 0.587              | 0.632              |
| Reference                   | CPDB                          | CPDB               | CPDB               |

## Model Applicability

Unknown features are fingerprint features in the query molecule, but not found or appearing too infrequently in the training set.

1. All properties and OPS components are within expected ranges.

## Feature Contribution

### Top features for positive contribution

| Fingerprint | Bit/Smiles | Feature Structure | Score |
|-------------|------------|-------------------|-------|
| FCFP_6      | 136627117  | <br>[*]OC         | 0.69  |

|                                        |            |                                                                                                                         |        |
|----------------------------------------|------------|-------------------------------------------------------------------------------------------------------------------------|--------|
| FCFP_6                                 | 565998553  | 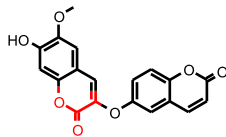<br><chem>[*]OC(=O)C(=[*])[*]</chem> | 0.357  |
| FCFP_6                                 | 1          | <br><chem>[*]O[*]</chem>             | 0.234  |
| Top Features for negative contribution |            |                                                                                                                         |        |
| Fingerprint                            | Bit/Smiles | Feature Structure                                                                                                       | Score  |
| FCFP_6                                 | 451847724  | <br><chem>[*]C=C/C(=[*])[*]</chem>   | -0.436 |
| FCFP_6                                 | 7          | <br><chem>[*]O</chem>              | -0.372 |
| FCFP_6                                 | 16         | <br><chem>[*][c](:[*]):[*]</chem>  | -0.354 |



# remdesivir

# TOPKAT\_Carcinogenic\_Potency\_TD50\_Rat

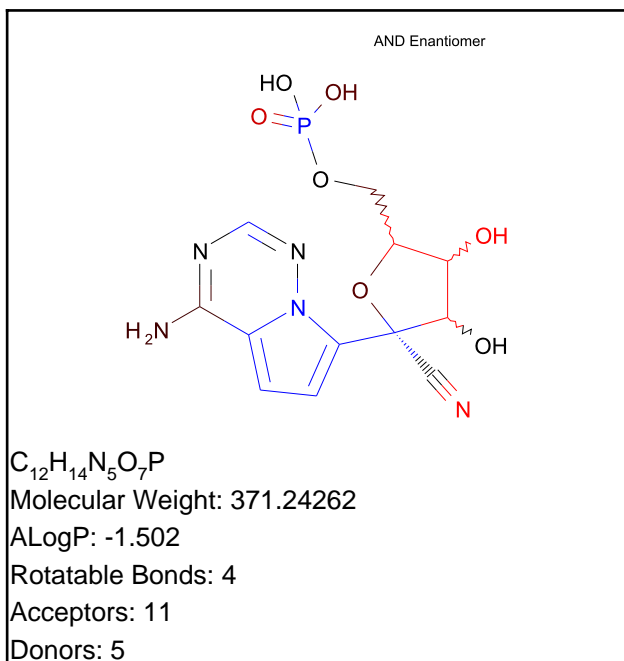

## Model Prediction

Prediction: 1.01

Unit: mg/kg\_body\_weight/day

Mahalanobis Distance: 16.2

Mahalanobis Distance p-value: 4.38e-015

Mahalanobis Distance: The Mahalanobis distance (MD) is a generalization of the Euclidean distance that accounts for correlations among the X properties. It is calculated as the distance to the center of the training data. The larger the MD, the less trustworthy the prediction.

Mahalanobis Distance p-value: The p-value gives the fraction of training data with an MD greater than or equal to the one for the given sample, assuming normally distributed data. The smaller the p-value, the less trustworthy the prediction. For highly non-normal X properties (e.g., fingerprints), the MD p-value is wildly inaccurate.

## Structural Similar Compounds

| Name                        | b-Thioguanine deoxyriboside                                                         | Hexamethylmelamine                                                                  | 604                                                                                 |
|-----------------------------|-------------------------------------------------------------------------------------|-------------------------------------------------------------------------------------|-------------------------------------------------------------------------------------|
| Structure                   | 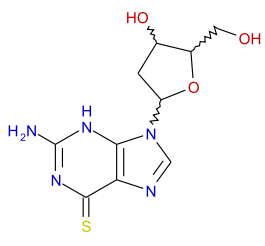 |  |  |
| Actual Endpoint (-log C)    | 5.13004                                                                             | 4.47751                                                                             | 5.13004                                                                             |
| Predicted Endpoint (-log C) | 4.82552                                                                             | 3.76275                                                                             | 4.96687                                                                             |
| Distance                    | 0.805                                                                               | 0.832                                                                               | 0.835                                                                               |
| Reference                   | CPDB                                                                                | CPDB                                                                                | CPDB                                                                                |

## Model Applicability

Unknown features are fingerprint features in the query molecule, but not found or appearing too infrequently in the training set.

1. All properties and OPS components are within expected ranges.
2. Unknown FCFP\_2 feature: 472180098: [\*]OP(=O)(O)O
3. Unknown FCFP\_2 feature: -836603894: [\*]C1[\*][\*]O[C@]1(C#[\*])[c]([\*]):[\*]

## Feature Contribution

### Top features for positive contribution

| Fingerprint | Bit/Smiles  | Feature Structure                                                                                                                       | Score |
|-------------|-------------|-----------------------------------------------------------------------------------------------------------------------------------------|-------|
| FCFP_6      | -1043250487 | <p>AND Enantiomer</p> 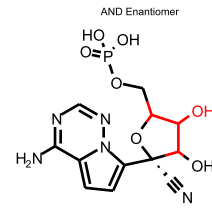 <p>[*]C1[*][*]C([*])C1O</p> | 1.15  |

|                                        |             |                                                                                                                                                                |        |
|----------------------------------------|-------------|----------------------------------------------------------------------------------------------------------------------------------------------------------------|--------|
| FCFP_6                                 | 9           | <p>AND Enantiomer</p> 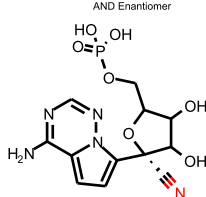 <p>[*]#N</p>                                         | 0.385  |
| FCFP_6                                 | 1           | <p>AND Enantiomer</p>  <p>[*]O[*]</p>                                       | 0.234  |
| Top Features for negative contribution |             |                                                                                                                                                                |        |
| Fingerprint                            | Bit/Smiles  | Feature Structure                                                                                                                                              | Score  |
| FCFP_6                                 | -1280036918 | <p>AND Enantiomer</p>  <p>[*]C([*])([*])[c]1:[cH]:[cH]:[c]([*]):n:1:[*]</p> | -0.363 |
| FCFP_6                                 | 16          | <p>AND Enantiomer</p>  <p>[*][c](:[*]):[*]</p>                            | -0.354 |
| FCFP_6                                 | 17          | <p>AND Enantiomer</p>  <p>[*]:n(:[*]):[*]</p>                             | -0.149 |





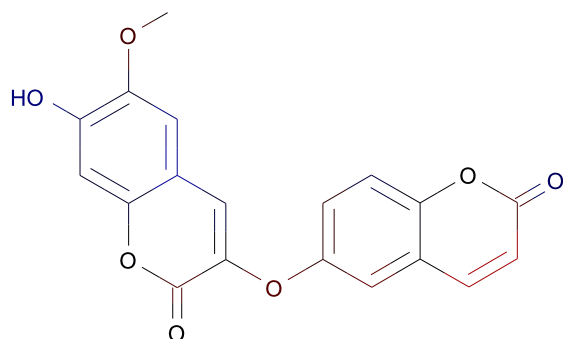C<sub>19</sub>H<sub>12</sub>O<sub>7</sub>

Molecular Weight: 352.29437

ALogP: 2.975

Rotatable Bonds: 3

Acceptors: 7

Donors: 1

## Model Prediction

Prediction: 0.0221

Unit: g/kg\_body\_weight

Mahalanobis Distance: 28.1

Mahalanobis Distance p-value: 3.16e-021

Mahalanobis Distance: The Mahalanobis distance (MD) is a generalization of the Euclidean distance that accounts for correlations among the X properties. It is calculated as the distance to the center of the training data. The larger the MD, the less trustworthy the prediction.

Mahalanobis Distance p-value: The p-value gives the fraction of training data with an MD greater than or equal to the one for the given sample, assuming normally distributed data. The smaller the p-value, the less trustworthy the prediction. For highly non-normal X properties (e.g., fingerprints), the MD p-value is wildly inaccurate.

## Structural Similar Compounds

| Name                        | ROTENONE         | 3,3'-DIMETHOXYBENZIDINE-4,4'-DIISOCYANATE | SODIUM ACIFLUORFEN              |
|-----------------------------|------------------|-------------------------------------------|---------------------------------|
| Structure                   |                  |                                           |                                 |
| Actual Endpoint (-log C)    | 5.0219           | 2.2956                                    | 4.16036                         |
| Predicted Endpoint (-log C) | 4.24871          | 3.47444                                   | 4.65915                         |
| Distance                    | 0.590            | 0.601                                     | 0.623                           |
| Reference                   | NTP REPORT # 320 | NTP 128 31                                | EPA COVER SHEET 0192;891101;(1) |

## Model Applicability

Unknown features are fingerprint features in the query molecule, but not found or appearing too infrequently in the training set.

1. All properties and OPS components are within expected ranges.
2. Unknown ECFP\_6 feature: 1336666212: [\*][c](:[\*]):[c](C=[\*]):[cH]:[\*]
3. Unknown ECFP\_6 feature: -570915357: [\*]O[c](:[cH]:[\*]):[c]([\*]):[\*]
4. Unknown ECFP\_6 feature: 464808839: [\*]C(=C[c](:[\*]):[\*])[\*]
5. Unknown ECFP\_6 feature: -741588105: [\*]O\C(=C[\*])\C(=[\*])[\*]
6. Unknown ECFP\_6 feature: -560785749: [\*]C(=[\*])O[c](:[\*]):[\*]
7. Unknown ECFP\_6 feature: 1573945311: [\*]OC(=O)C(=[\*])[\*]
8. Unknown ECFP\_6 feature: 1305253718: [\*]C(=[\*])O[c](:[\*]):[\*]
9. Unknown ECFP\_6 feature: 1745066357: [\*]\C=C/[c](:[\*]):[\*]
10. Unknown ECFP\_6 feature: -1885846789: [\*]OC(=O)C=[\*]
11. Unknown ECFP\_6 feature: 1307307440: [\*]:[c](:[\*])OC
12. Unknown ECFP\_6 feature: 2019062761: [\*]:[c](:[\*])O

## Feature Contribution

### Top features for positive contribution

| Fingerprint | Bit/Smiles | Feature Structure | Score |
|-------------|------------|-------------------|-------|
|             |            |                   |       |

|                                        |            |                                                                                                                                 |        |
|----------------------------------------|------------|---------------------------------------------------------------------------------------------------------------------------------|--------|
| FCFP_6                                 | 451847724  | 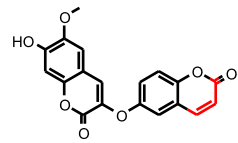<br><chem>[*]C=C/C(=[*])[*]</chem>           | 0.16   |
| ECFP_6                                 | -176455838 | <br><chem>[*]O[c](:[cH]:[*]):[cH]:[*]</chem> | 0.106  |
| ECFP_6                                 | 683445015  | <br><chem>[*]O[*]</chem>                     | 0.0734 |
| Top Features for negative contribution |            |                                                                                                                                 |        |
| Fingerprint                            | Bit/Smiles | Feature Structure                                                                                                               | Score  |
| ECFP_6                                 | 2106656448 | <br><chem>[*]C(=O)[*]</chem>               | -0.11  |
| FCFP_6                                 | 1          | <br><chem>[*]O[*]</chem>                   | -0.102 |

FCFP\_6

203677720

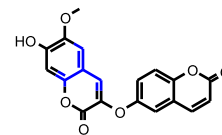

[\*][c](:[\*]):[c](C=[\*]  
):[cH]:[\*]

-0.0713

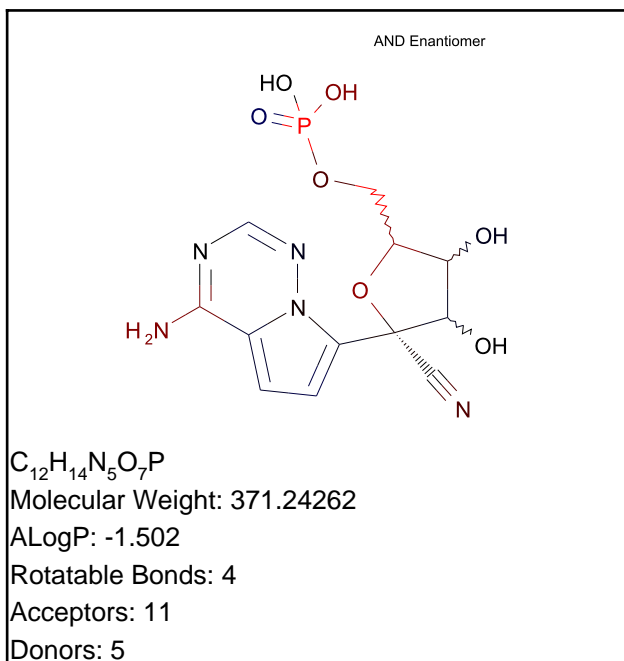

### Model Prediction

Prediction: 0.00379

Unit: g/kg\_body\_weight

Mahalanobis Distance: 47.7

Mahalanobis Distance p-value: 2.93e-054

Mahalanobis Distance: The Mahalanobis distance (MD) is a generalization of the Euclidean distance that accounts for correlations among the X properties. It is calculated as the distance to the center of the training data. The larger the MD, the less trustworthy the prediction.

Mahalanobis Distance p-value: The p-value gives the fraction of training data with an MD greater than or equal to the one for the given sample, assuming normally distributed data. The smaller the p-value, the less trustworthy the prediction. For highly non-normal X properties (e.g., fingerprints), the MD p-value is wildly inaccurate.

### Structural Similar Compounds

| Name                        | TETRACYCLINE .HCL                                                                   | 4;4'-DIAMINO-2;2'-STILBENEDIS                                                       | OXYTETRACYCLINE .HCL                                                                |
|-----------------------------|-------------------------------------------------------------------------------------|-------------------------------------------------------------------------------------|-------------------------------------------------------------------------------------|
| Structure                   | 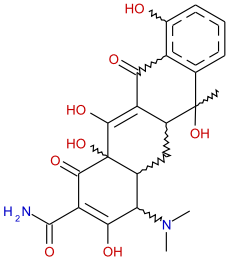 |  |  |
| Actual Endpoint (-log C)    | 2.85193                                                                             | 2.47175                                                                             | 2.56626                                                                             |
| Predicted Endpoint (-log C) | 3.94748                                                                             | 3.53715                                                                             | 3.75581                                                                             |
| Distance                    | 0.746                                                                               | 0.746                                                                               | 0.802                                                                               |
| Reference                   | NTP REPORT # 344                                                                    | NTP 412 82                                                                          | NTP REPORT # 315                                                                    |

### Model Applicability

Unknown features are fingerprint features in the query molecule, but not found or appearing too infrequently in the training set.

1. All properties and OPS components are within expected ranges.
2. Unknown FCFP\_2 feature: 472180098: [\*]OP(=O)(O)O
3. Unknown FCFP\_2 feature: -332197802: [\*][c]1:[\*]:[\*]:[c](:[\*]):n:1:n:[\*]
4. Unknown ECFP\_6 feature: -1114776580: [\*]C#[\*]
5. Unknown ECFP\_6 feature: -1101847286: [\*]#N
6. Unknown ECFP\_6 feature: 672362763: [\*]:n(:[\*]):[\*]
7. Unknown ECFP\_6 feature: 1126642748: [\*]OP(=O)(O)O
8. Unknown ECFP\_6 feature: 2100964382: [\*]P(=O)([\*])[\*]
9. Unknown ECFP\_6 feature: 2024329577: [\*]P(=O)([\*])O
10. Unknown ECFP\_6 feature: -1250439909: [\*]COP(=O)([\*])[\*]
11. Unknown ECFP\_6 feature: -1687549011: [\*]OCC([\*])[\*]
12. Unknown ECFP\_6 feature: -194719409: [\*]C1[\*][\*]C([\*])([\*])O1
13. Unknown ECFP\_6 feature: -553149446: [\*]CC1O[\*][\*]C1[\*]
14. Unknown ECFP\_6 feature: 305695353: [\*]C1[\*][\*]C([\*])C1O
15. Unknown ECFP\_6 feature: -521596699: [\*]C1[\*][\*]C([\*])([\*])C1O
16. Unknown ECFP\_6 feature: 1258791451: [\*]C1[\*][\*]O[C@]1(C#[\*])[c](:[\*]):[\*]
17. Unknown ECFP\_6 feature: 2024749573: [\*]C([\*])O
18. Unknown ECFP\_6 feature: -264833661: [\*]C([\*])([\*])C#N
19. Unknown ECFP\_6 feature: 1412053881: [\*]C#N

20. Unknown ECFP\_6 feature: -1507082173: [\*][c]1:[\*]:[\*]:[c](:[\*]):n:1:n:[\*]
21. Unknown ECFP\_6 feature: -676555381: [\*]:[cH]:n:n(:[\*]):[\*]
22. Unknown ECFP\_6 feature: -710237522: [\*]:n:[cH]:n:[\*]
23. Unknown ECFP\_6 feature: -677309799: [\*][c](:[\*]):n:[cH]:[\*]
24. Unknown ECFP\_6 feature: -1734834311: [\*]:n:[c](N):[c](:[\*]):[\*]
25. Unknown ECFP\_6 feature: 1334415134: [\*][c](:[\*]):[c]1:[cH]:[\*]:[\*]:n:1:[\*]
26. Unknown ECFP\_6 feature: -66263742: [\*]C([\*])([\*])[c]1:[cH]:[\*]:[\*]:n:1:[\*]
27. Unknown ECFP\_6 feature: -938530932: [\*]:[c](:[\*])N

## Feature Contribution

### Top features for positive contribution

| Fingerprint | Bit/Smiles  | Feature Structure                                                                                                                      | Score |
|-------------|-------------|----------------------------------------------------------------------------------------------------------------------------------------|-------|
| ECFP_6      | -167460056  | <p>AND Enantiomer</p> 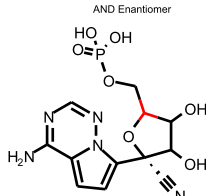 <p>[*]C([*])[*]</p>          | 0.136 |
| FCFP_6      | -1143715940 | <p>AND Enantiomer</p>  <p>[*]COP(=[*])([*])[*]</p> | 0.13  |
| ECFP_6      | 1559650422  | <p>AND Enantiomer</p>  <p>[*]C[*]</p>             | 0.129 |

### Top Features for negative contribution

| Fingerprint | Bit/Smiles | Feature Structure | Score |
|-------------|------------|-------------------|-------|
|             |            |                   |       |

|        |            |                                                                                                                                                      |         |
|--------|------------|------------------------------------------------------------------------------------------------------------------------------------------------------|---------|
| FCFP_6 | 1          | <div><p>AND Enantiomer</p>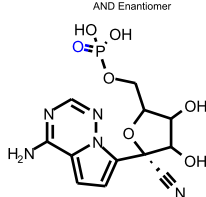<p>[*]O[*]</p></div>                    | -0.102  |
| ECFP_6 | 1996767644 | <div><p>AND Enantiomer</p><p>[*][c](:[*]):[cH]:[cH]:[*]</p></div> | -0.0497 |
| FCFP_6 | 16         | <div><p>AND Enantiomer</p><p>[*][c](:[*]):[*]</p></div>           | -0.0462 |

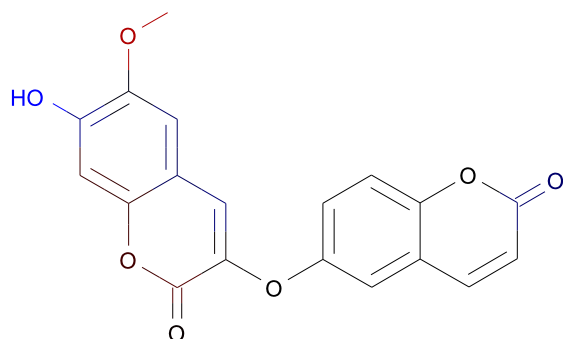C<sub>19</sub>H<sub>12</sub>O<sub>7</sub>

Molecular Weight: 352.29437

ALogP: 2.975

Rotatable Bonds: 3

Acceptors: 7

Donors: 1

## Model Prediction

Prediction: 0.117

Unit: g/kg\_body\_weight

Mahalanobis Distance: 7.65

Mahalanobis Distance p-value: 0.0562

Mahalanobis Distance: The Mahalanobis distance (MD) is a generalization of the Euclidean distance that accounts for correlations among the X properties. It is calculated as the distance to the center of the training data. The larger the MD, the less trustworthy the prediction.

Mahalanobis Distance p-value: The p-value gives the fraction of training data with an MD greater than or equal to the one for the given sample, assuming normally distributed data. The smaller the p-value, the less trustworthy the prediction. For highly non-normal X properties (e.g., fingerprints), the MD p-value is wildly inaccurate.

## Structural Similar Compounds

| Name                        | 3,3'-DIMETHOXYBENZIDINE-4,4'-DIISOCYANATE | ROTENONE       | C.I.PIGMENT RED 3 |
|-----------------------------|-------------------------------------------|----------------|-------------------|
| Structure                   |                                           |                |                   |
| Actual Endpoint (-log C)    | 2.17504                                   | 5.06769        | 2.65635           |
| Predicted Endpoint (-log C) | 3.78717                                   | 4.11907        | 2.97957           |
| Distance                    | 0.532                                     | 0.592          | 0.594             |
| Reference                   | NCI/NTP TR-128                            | NCI/NTP TR-320 | NCI/NTP TR-407    |

## Model Applicability

Unknown features are fingerprint features in the query molecule, but not found or appearing too infrequently in the training set.

1. All properties and OPS components are within expected ranges.

## Feature Contribution

### Top features for positive contribution

| Fingerprint | Bit/Smiles | Feature Structure | Score |
|-------------|------------|-------------------|-------|
| FCFP_2      | 136627117  | <br>[*]OC         | 0.173 |

|                                        |            |                                                                                                                                                       |        |
|----------------------------------------|------------|-------------------------------------------------------------------------------------------------------------------------------------------------------|--------|
| FCFP_2                                 | 1036089772 | 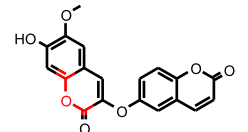<br><chem>[*]C(=[*])O[c](:[*]):</chem><br><chem>[*]</chem>         | 0.0749 |
| FCFP_2                                 | 332760439  | <br><chem>[*]O[c](:[cH]:[*]):[c]</chem><br><chem>][(*)]:[*]</chem> | 0.0611 |
| Top Features for negative contribution |            |                                                                                                                                                       |        |
| Fingerprint                            | Bit/Smiles | Feature Structure                                                                                                                                     | Score  |
| FCFP_2                                 | 7          | <br><chem>[*]O</chem>                                              | -0.214 |
| FCFP_2                                 | -549108873 | <br><chem>[*]:[c](:[*])O</chem>                                  | -0.127 |
| FCFP_2                                 | 1872154524 | <br><chem>[*]C(=O)[*]</chem>                                     | -0.105 |





## remdesivir

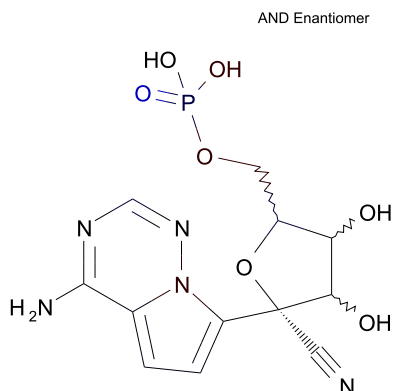
$$\text{C}_{12}\text{H}_{14}\text{N}_5\text{O}_7\text{P}$$

Molecular Weight: 371.24262

|ALogP: -1.502

Rotatable Bonds: 4

Acceptors: 11

Donors: 5

## Model Prediction

Prediction: 0.235

Unit: g/kg\_body\_weight

Mahalanobis Distance: 9.52

Mahalanobis Distance p-value: 0.000247

**Mahalanobis Distance:** The Mahalanobis distance (MD) is a generalization of the Euclidean distance that accounts for correlations among the X properties. It is calculated as the distance to the center of the training data. The larger the MD, the less trustworthy the prediction.

Mahalanobis Distance p-value: The p-value gives the fraction of training data with an MD greater than or equal to the one for the given sample, assuming normally distributed data. The smaller the p-value, the less trustworthy the prediction. For highly non-normal X properties (e.g., fingerprints), the MD p-value is wildly inaccurate.

## TOPKAT Rat Maximum Tolerated Dose Feed

## Structural Similar Compounds

| Name                        | 4,4'-DIAMINO-2,2'-STILBENEDISULFONIC ACID.2NaSALT | OXYTETRACYCLINE | 50%1,4,5,8-TETRAAMINOANTHRAQUINONE + DERIVATIVES |
|-----------------------------|---------------------------------------------------|-----------------|--------------------------------------------------|
| Structure                   |                                                   |                 |                                                  |
| Actual Endpoint (-log C)    | 2.50759                                           | 2.36214         | 3.0764                                           |
| Predicted Endpoint (-log C) | 3.26068                                           | 2.77834         | 3.08142                                          |
| Distance                    | 0.743                                             | 0.818           | 0.989                                            |
| Reference                   | NCI/NTP TR-412                                    | NCI/NTP TR-315  | NCI/NTP TR-299                                   |

## Model Applicability

Unknown features are fingerprint features in the query molecule, but not found or appearing too infrequently in the training set.

1. Molecular\_PolarSurfaceArea out of range. Value: 206.26. Training min, max, mean, SD: 0, 201.84, 63.052, 40.7.
2. Unknown FCFP\_2 feature: 472180098: [\*]OP(=O)(O)O
3. Unknown FCFP\_2 feature: -836603894: [\*]C1[\*][\*]O[C@]1(C#[\*])[c](:[\*]):[\*]
4. Unknown FCFP\_2 feature: -1277879912: [\*]C([\*])([\*])C#N
5. Unknown FCFP\_2 feature: -332197802: [\*][c]1:[\*]:[\*]:[c](:[\*]):n:1:n:[\*]
6. Unknown FCFP\_2 feature: -124685461: [\*]:n:[cH]:n:[\*]

## Feature Contribution

## Top features for positive contribution

| Fingerprint | Bit/Smiles | Feature Structure | Score |
|-------------|------------|-------------------|-------|
|             |            |                   |       |

| FCFP_2                                 | -1143715940 | <p>AND Enantiomer</p> 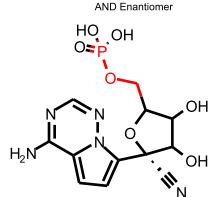 <p>[*]COP(=[*])([*])[*]</p> | 0.095   |
|----------------------------------------|-------------|---------------------------------------------------------------------------------------------------------------------------------------|---------|
| FCFP_2                                 | 3           | <p>AND Enantiomer</p>  <p>[*]O</p>                 | 0.0737  |
| FCFP_2                                 | 17          | <p>AND Enantiomer</p>  <p>[*]:n(:[*]):[*]</p>      | 0.0441  |
| Top Features for negative contribution |             |                                                                                                                                       |         |
| Fingerprint                            | Bit/Smiles  | Feature Structure                                                                                                                     | Score   |
| FCFP_2                                 | 1872154524  | <p>AND Enantiomer</p>  <p>[*]C(=O)[*]</p>         | -0.105  |
| FCFP_2                                 | 1           | <p>AND Enantiomer</p>  <p>[*]O[*]</p>            | -0.0796 |

|        |    |                                                                                                                                   |         |
|--------|----|-----------------------------------------------------------------------------------------------------------------------------------|---------|
| FCFP_2 | 16 | <p>AND Enantiomer</p> 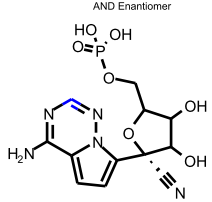 <p>[*][c](:[*]):[*]</p> | -0.0512 |
|--------|----|-----------------------------------------------------------------------------------------------------------------------------------|---------|

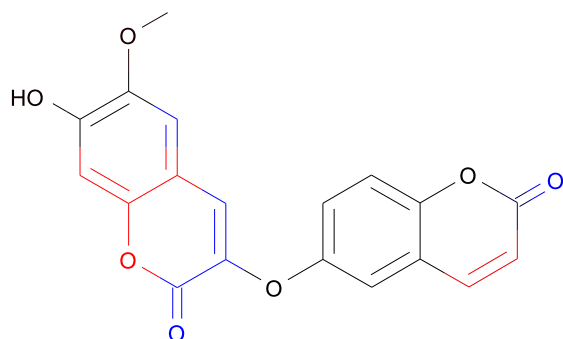C<sub>19</sub>H<sub>12</sub>O<sub>7</sub>

Molecular Weight: 352.29437

ALogP: 2.975

Rotatable Bonds: 3

Acceptors: 7

Donors: 1

## Model Prediction

Prediction: 0.000177

Unit: g/kg\_body\_weight

Mahalanobis Distance: 12

Mahalanobis Distance p-value: 8.53e-009

Mahalanobis Distance: The Mahalanobis distance (MD) is a generalization of the Euclidean distance that accounts for correlations among the X properties. It is calculated as the distance to the center of the training data. The larger the MD, the less trustworthy the prediction.

Mahalanobis Distance p-value: The p-value gives the fraction of training data with an MD greater than or equal to the one for the given sample, assuming normally distributed data. The smaller the p-value, the less trustworthy the prediction. For highly non-normal X properties (e.g., fingerprints), the MD p-value is wildly inaccurate.

## Structural Similar Compounds

| Name                        | PENICILLIN VK  | PROBENECID     | 8-METHOXYPSORALEN |
|-----------------------------|----------------|----------------|-------------------|
| Structure                   |                |                |                   |
| Actual Endpoint (-log C)    | 2.54455        | 2.85333        | 3.45978           |
| Predicted Endpoint (-log C) | 3.9702         | 2.4258         | 4.14745           |
| Distance                    | 0.835          | 0.867          | 0.868             |
| Reference                   | NCI/NTP TR-336 | NCI/NTP TR-395 | NCI/NTP TR-359    |

## Model Applicability

Unknown features are fingerprint features in the query molecule, but not found or appearing too infrequently in the training set.

1. Num\_H\_Acceptors out of range. Value: 7. Training min, max, mean, SD: 0, 6, 1.6146, 1.644.
2. OPS PC9 out of range. Value: 4.6388. Training min, max, SD, explained variance: -2.7086, 2.9267, 1.019, 0.0321.
3. Unknown FCFP\_2 feature: 436915834: [\*]O\C(=C\[\*])\C(=[\*])[\*]

## Feature Contribution

### Top features for positive contribution

| Fingerprint | Bit/Smiles | Feature Structure                                | Score |
|-------------|------------|--------------------------------------------------|-------|
| FCFP_2      | 332760439  | <br><chem>[*]O[c](:[cH]:[*]):[c]([*]):[*]</chem> | 0.672 |

|                                        |            |                                                                                                                                      |        |
|----------------------------------------|------------|--------------------------------------------------------------------------------------------------------------------------------------|--------|
| FCFP_2                                 | 1          | 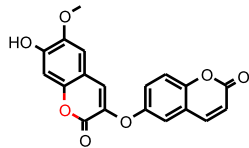<br><chem>[*]O[*]</chem>                          | 0.511  |
| FCFP_2                                 | 451847724  | <br><chem>[*]C=C/C(=[*])[*]</chem>                | 0.225  |
| Top Features for negative contribution |            |                                                                                                                                      |        |
| Fingerprint                            | Bit/Smiles | Feature Structure                                                                                                                    | Score  |
| FCFP_2                                 | 203677720  | <br><chem>[*][c](:[*]):[c](C=[*]):[cH]:[*]</chem> | -0.406 |
| FCFP_2                                 | 565998553  | <br><chem>[*]OC(=O)C(=[*])[*]</chem>            | -0.348 |
| FCFP_2                                 | 1872154524 | <br><chem>[*]C(=O)[*]</chem>                    | -0.307 |



# remdesivir

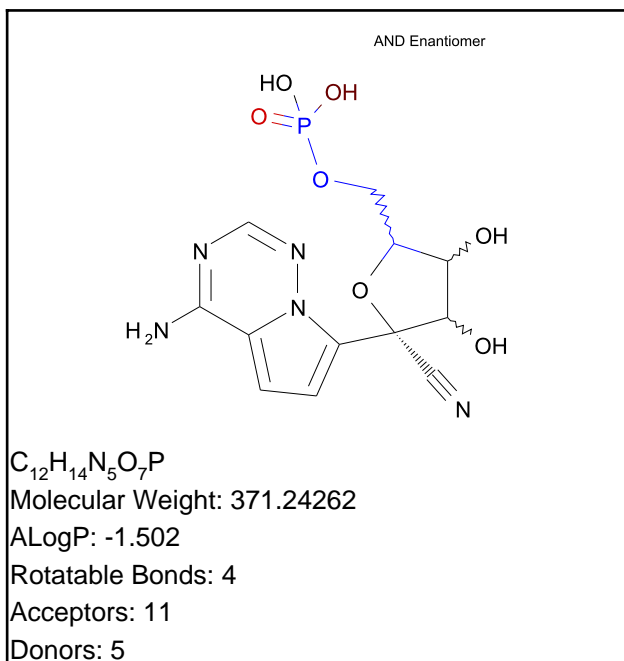

## Model Prediction

Prediction: 0.000298

Unit: g/kg\_body\_weight

Mahalanobis Distance: 17.2

Mahalanobis Distance p-value: 5.05e-016

Mahalanobis Distance: The Mahalanobis distance (MD) is a generalization of the Euclidean distance that accounts for correlations among the X properties. It is calculated as the distance to the center of the training data. The larger the MD, the less trustworthy the prediction.

Mahalanobis Distance p-value: The p-value gives the fraction of training data with an MD greater than or equal to the one for the given sample, assuming normally distributed data. The smaller the p-value, the less trustworthy the prediction. For highly non-normal X properties (e.g., fingerprints), the MD p-value is wildly inaccurate.

# TOPKAT\_Rat\_Maximum\_Tolerated\_Dose\_Gavage

## Structural Similar Compounds

| Name                        | AMPICILLIN TRIHYDRATE                                                               | OCHRATOXIN                                                                          | PENICILLIN VK                                                                       |
|-----------------------------|-------------------------------------------------------------------------------------|-------------------------------------------------------------------------------------|-------------------------------------------------------------------------------------|
| Structure                   | 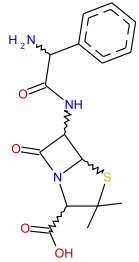 |  |  |
| Actual Endpoint (-log C)    | 2.36724                                                                             | 6.28396                                                                             | 2.54455                                                                             |
| Predicted Endpoint (-log C) | 2.27651                                                                             | 5.12358                                                                             | 3.9702                                                                              |
| Distance                    | 1.255                                                                               | 1.482                                                                               | 1.498                                                                               |
| Reference                   | NCI/NTP TR-318                                                                      | NCI/NTP TR-358                                                                      | NCI/NTP TR-336                                                                      |

## Model Applicability

Unknown features are fingerprint features in the query molecule, but not found or appearing too infrequently in the training set.

- Num\_H\_Donors out of range. Value: 5. Training min, max, mean, SD: 0, 3, 0.4375, 0.8311.
- Num\_H\_Acceptors out of range. Value: 11. Training min, max, mean, SD: 0, 6, 1.6146, 1.644.
- Molecular\_PolarSASA out of range. Value: 321.97. Training min, max, mean, SD: 0, 223.97, 50.816, 55.15.
- Molecular\_PolarSurfaceArea out of range. Value: 206.26. Training min, max, mean, SD: 0, 138.03, 28.978, 32.1.
- OPS PC1 out of range. Value: 9.0116. Training min, max, SD, explained variance: -4.0008, 7.9165, 2.861, 0.2531.
- OPS PC5 out of range. Value: -4.1876. Training min, max, SD, explained variance: -3.4, 4.1587, 1.489, 0.0686.
- OPS PC9 out of range. Value: -2.7276. Training min, max, SD, explained variance: -2.7086, 2.9267, 1.019, 0.0321.
- Unknown FCFP\_2 feature: 472180098: [\*]OP(=O)(O)O
- Unknown FCFP\_2 feature: -836603894: [\*]C1[\*][\*]O[C@]1(C#[\*])[c](:[\*]):[\*]
- Unknown FCFP\_2 feature: -1277879912: [\*]C([\*])([\*])C#N
- Unknown FCFP\_2 feature: -1362791977: [\*]C#N
- Unknown FCFP\_2 feature: -332197802: [\*][c]1:[\*]:[\*]:[c](:[\*]):n:1:n:[\*]
- Unknown FCFP\_2 feature: -124685461: [\*]:n:[cH]:n:[\*]

## Feature Contribution



| Top features for positive contribution |            |                                                                                                                               |        |
|----------------------------------------|------------|-------------------------------------------------------------------------------------------------------------------------------|--------|
| Fingerprint                            | Bit/Smiles | Feature Structure                                                                                                             | Score  |
| FCFP_2                                 | 1          | <p>AND Enantiomer</p> 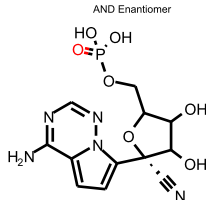 <p>[*]O[*]</p>      | 0.511  |
| FCFP_2                                 | 3          | <p>AND Enantiomer</p>  <p>[*]O</p>         | 0.104  |
| Top Features for negative contribution |            |                                                                                                                               |        |
| Fingerprint                            | Bit/Smiles | Feature Structure                                                                                                             | Score  |
| FCFP_2                                 | 1872154524 | <p>AND Enantiomer</p>  <p>[*]C(=O)[*]</p> | -0.307 |
| FCFP_2                                 | 0          | <p>AND Enantiomer</p>  <p>[*]C=[*]</p>   | -0.29  |
|                                        |            |                                                                                                                               |        |

|        |             |                                                                                                                                 |        |
|--------|-------------|---------------------------------------------------------------------------------------------------------------------------------|--------|
| FCFP_2 | -1272768868 | <p>AND Enantiomer</p> 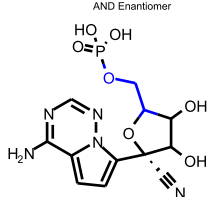 <p>[*]OCC([*])[*]</p> | -0.271 |
|--------|-------------|---------------------------------------------------------------------------------------------------------------------------------|--------|

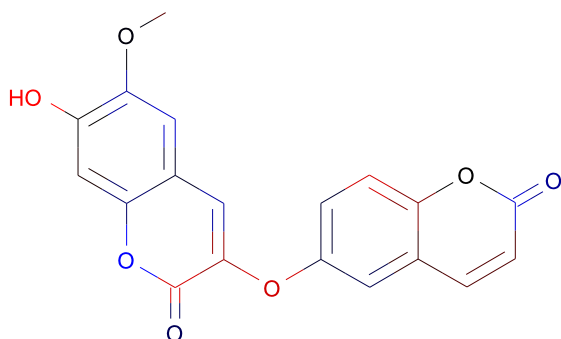C<sub>19</sub>H<sub>12</sub>O<sub>7</sub>

Molecular Weight: 352.29437

ALogP: 2.975

Rotatable Bonds: 3

Acceptors: 7

Donors: 1

## Model Prediction

Prediction: 0.288

Unit: g/kg\_body\_weight

Mahalanobis Distance: 16.5

Mahalanobis Distance p-value: 0.121

Mahalanobis Distance: The Mahalanobis distance (MD) is a generalization of the Euclidean distance that accounts for correlations among the X properties. It is calculated as the distance to the center of the training data. The larger the MD, the less trustworthy the prediction.

Mahalanobis Distance p-value: The p-value gives the fraction of training data with an MD greater than or equal to the one for the given sample, assuming normally distributed data. The smaller the p-value, the less trustworthy the prediction. For highly non-normal X properties (e.g., fingerprints), the MD p-value is wildly inaccurate.

## Structural Similar Compounds

| Name                        | STERIGMATOCYSTIN | DICOUMAROL       | METHYL ORANGE; SODIUM SALT (Na STRIPPED) |
|-----------------------------|------------------|------------------|------------------------------------------|
| Structure                   |                  |                  |                                          |
| Actual Endpoint (-log C)    | 3.432            | 3.129            | 3.707                                    |
| Predicted Endpoint (-log C) | 3.69503          | 2.86156          | 2.64236                                  |
| Distance                    | 0.509            | 0.543            | 0.588                                    |
| Reference                   | FCTXAV 7;135;69  | SMWOAS 83;471;53 | 85JCAE -;1306;86                         |

## Model Applicability

Unknown features are fingerprint features in the query molecule, but not found or appearing too infrequently in the training set.

1. All properties and OPS components are within expected ranges.
2. Unknown FCFP\_6 feature: 16: [\*][c](:[\*]):[\*]
3. Unknown FCFP\_6 feature: 1618154665: [\*][c](:[\*]):[cH]:[c]([\*]):[\*]
4. Unknown FCFP\_6 feature: 74595001: [\*][c](:[\*]):[c](O):[cH]:[\*]
5. Unknown FCFP\_6 feature: 451371068: [\*]C(=C[c](:[\*]):[\*])[\*]
6. Unknown FCFP\_6 feature: -549108873: [\*]:[c](:[\*])O

## Feature Contribution

### Top features for positive contribution

| Fingerprint | Bit/Smiles | Feature Structure | Score |
|-------------|------------|-------------------|-------|
|             |            |                   |       |

|                                        |            |                                                                                                                                               |        |
|----------------------------------------|------------|-----------------------------------------------------------------------------------------------------------------------------------------------|--------|
| ECFP_6                                 | 642810091  | 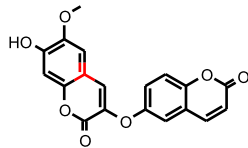<br><chem>[*][c](:[*]):[*]</chem>                          | 0.281  |
| ECFP_6                                 | 560785749  | <br><chem>[*]C(=[*])O[c](:[*]):</chem><br><chem>[*]</chem> | 0.259  |
| FCFP_6                                 | 436915834  | <br><chem>[*]O[C(=C[*])C(=[*])</chem><br><chem>][*]</chem> | 0.184  |
| Top Features for negative contribution |            |                                                                                                                                               |        |
| Fingerprint                            | Bit/Smiles | Feature Structure                                                                                                                             | Score  |
| ECFP_6                                 | 2106656448 | <br><chem>[*]C(=O)[*]</chem>                             | -0.352 |
| ECFP_6                                 | 683445015  | <br><chem>[*]O[*]</chem>                                 | -0.266 |

ECFP\_6

-176455838

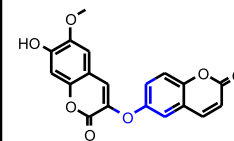

[\*]O[c](:[cH]:[\*]):[c  
H]:[\*]

-0.257

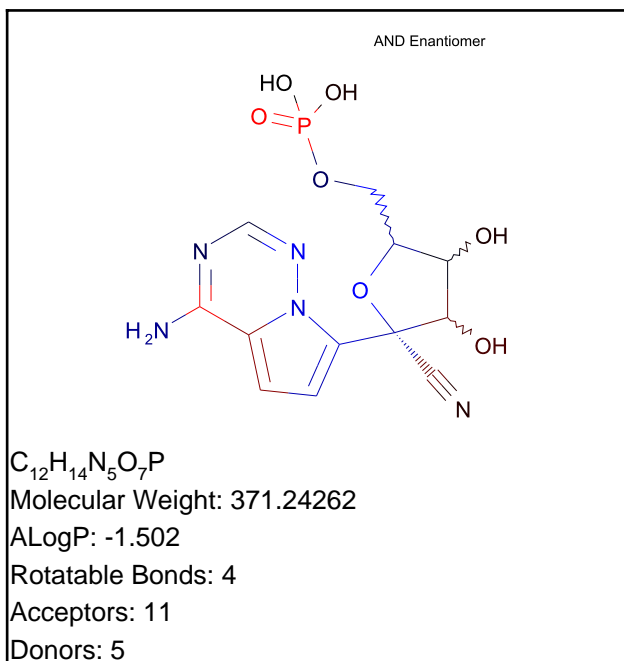

### Model Prediction

Prediction: 0.309

Unit: g/kg\_body\_weight

Mahalanobis Distance: 29.4

Mahalanobis Distance p-value: 1.72e-059

Mahalanobis Distance: The Mahalanobis distance (MD) is a generalization of the Euclidean distance that accounts for correlations among the X properties. It is calculated as the distance to the center of the training data. The larger the MD, the less trustworthy the prediction.

Mahalanobis Distance p-value: The p-value gives the fraction of training data with an MD greater than or equal to the one for the given sample, assuming normally distributed data. The smaller the p-value, the less trustworthy the prediction. For highly non-normal X properties (e.g., fingerprints), the MD p-value is wildly inaccurate.

### Structural Similar Compounds

| Name                        | 5'-ADENYLIC ACID; POTASSIUM SALT (K STRIPPED)                                       | INOSINATE; DISODIUM SALT (Na STRIPPED)                                              | INOSINE-5'-PHOSPHORIC ACID                                                          |
|-----------------------------|-------------------------------------------------------------------------------------|-------------------------------------------------------------------------------------|-------------------------------------------------------------------------------------|
| Structure                   | 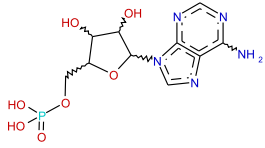 |  |  |
| Actual Endpoint (-log C)    | 1.49                                                                                | 1.34                                                                                | 1.338                                                                               |
| Predicted Endpoint (-log C) | 2.45569                                                                             | 2.92201                                                                             | 1.35922                                                                             |
| Distance                    | 0.361                                                                               | 0.428                                                                               | 0.592                                                                               |
| Reference                   | OYYAA2 4;689;70                                                                     | AJINO* -;-,73                                                                       | ARTODN 47;77;81                                                                     |

### Model Applicability

Unknown features are fingerprint features in the query molecule, but not found or appearing too infrequently in the training set.

- OPS PC10 out of range. Value: 15.526. Training min, max, SD, explained variance: -6.0395, 14.892, 2.468, 0.0220.
- Unknown ECFP\_2 feature: 1258791451: [\*]C1[\*][\*]O[C@]1(C#[\*])[c](:[\*]):[\*]
- Unknown ECFP\_2 feature: -264833661: [\*]C([\*])([\*])C#N
- Unknown ECFP\_2 feature: -66263742: [\*]C([\*])([\*])[c]1:[cH]:[\*]:[\*]:n:1:[\*]
- Unknown FCFP\_6 feature: 16: [\*][c](:[\*]):[\*]
- Unknown FCFP\_6 feature: 472180098: [\*]OP(=O)(O)O
- Unknown FCFP\_6 feature: -836603894: [\*]C1[\*][\*]O[C@]1(C#[\*])[c](:[\*]):[\*]
- Unknown FCFP\_6 feature: -332197802: [\*][c]1:[\*]:[\*]:[c](:[\*]):n:1:n:[\*]
- Unknown FCFP\_6 feature: 4427049: [\*]:[cH]:n:n(:[\*]):[\*]
- Unknown FCFP\_6 feature: -124685461: [\*]:n:[cH]:n:[\*]
- Unknown FCFP\_6 feature: 1747237384: [\*][c](:[\*]):n:[cH]:[\*]
- Unknown FCFP\_6 feature: -1151884458: [\*]:n:[c](N):[c](:[\*]):[\*]
- Unknown FCFP\_6 feature: 1618154665: [\*][c](:[\*]):[cH]:[c]([\*]):[\*]
- Unknown FCFP\_6 feature: 1069584379: [\*]:[c](:[\*])N

### Feature Contribution

Top features for positive contribution

| Fingerprint                            | Bit/Smiles | Feature Structure                                                                                                                   | Score  |
|----------------------------------------|------------|-------------------------------------------------------------------------------------------------------------------------------------|--------|
| ECFP_6                                 | 642810091  | <p>AND Enantiomer</p> 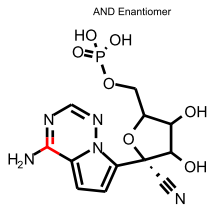 <p>[*][c](:[*]):[*]</p>   | 0.281  |
| ECFP_6                                 | -826638028 | <p>AND Enantiomer</p>  <p>[*]P(=[*])([*])[*]</p> | 0.225  |
| ECFP_6                                 | 2100964382 | <p>AND Enantiomer</p>  <p>[*]P(=O)([*])[*]</p>   | 0.166  |
| Top Features for negative contribution |            |                                                                                                                                     |        |
| Fingerprint                            | Bit/Smiles | Feature Structure                                                                                                                   | Score  |
| ECFP_6                                 | 683445015  | <p>AND Enantiomer</p>  <p>[*]O[*]</p>          | -0.266 |
|                                        |            |                                                                                                                                     |        |

|        |             |                                                                                                                                                               |        |
|--------|-------------|---------------------------------------------------------------------------------------------------------------------------------------------------------------|--------|
| ECFP_6 | 655739385   | <p>AND Enantiomer</p> 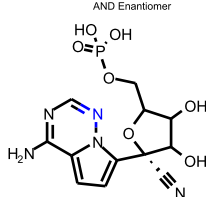 <p>[*]:n:[*]</p>                                    | -0.239 |
| FCFP_6 | -1539132615 | <p>AND Enantiomer</p>  <p>[*]C([*])([*])[c]1:[c<br/>H]:[*]:[*]:n:1:[*]</p> | -0.2   |
